# Supplementary material for: Non-Invasive Differential Diagnosis of Cervical Neoplastic Lesions by the Lipid Profile Analysis of Cervical Scrapings
Source: MDPI journal article supplement (doi:10.3390/metabo12090883), 2022-09-19

# NILM vs cervicitis

$$R^2_X = 0.67$$
$$R^2_Y = 0.26$$
$$Q^2Y = -0.39$$
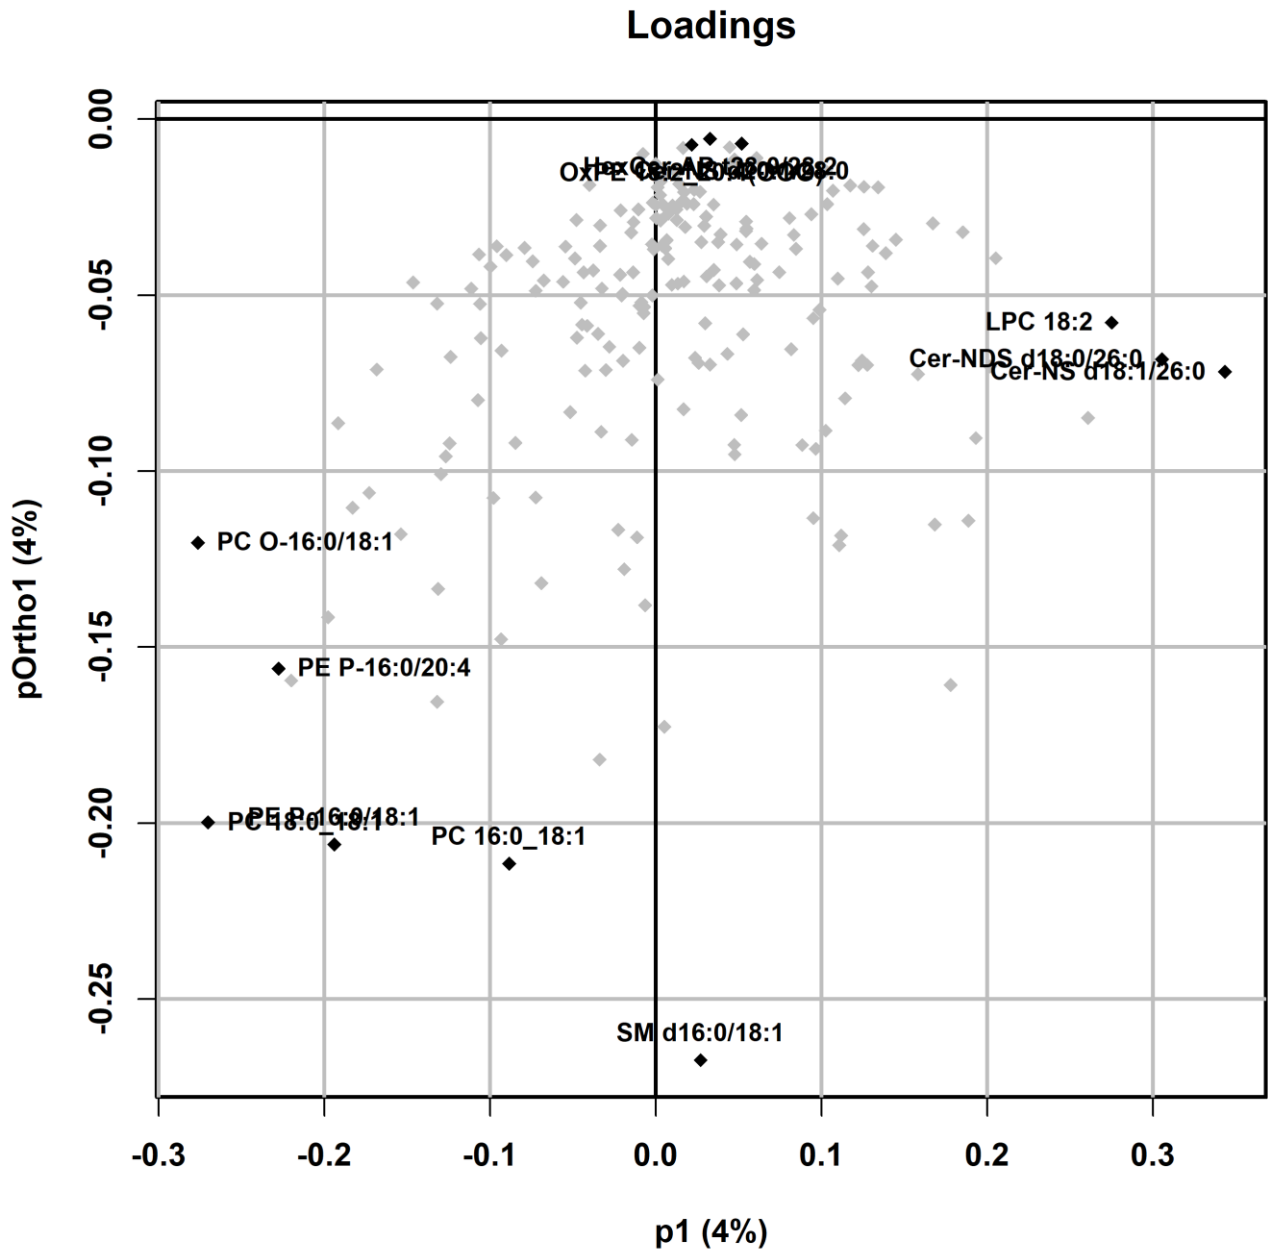

S-plot

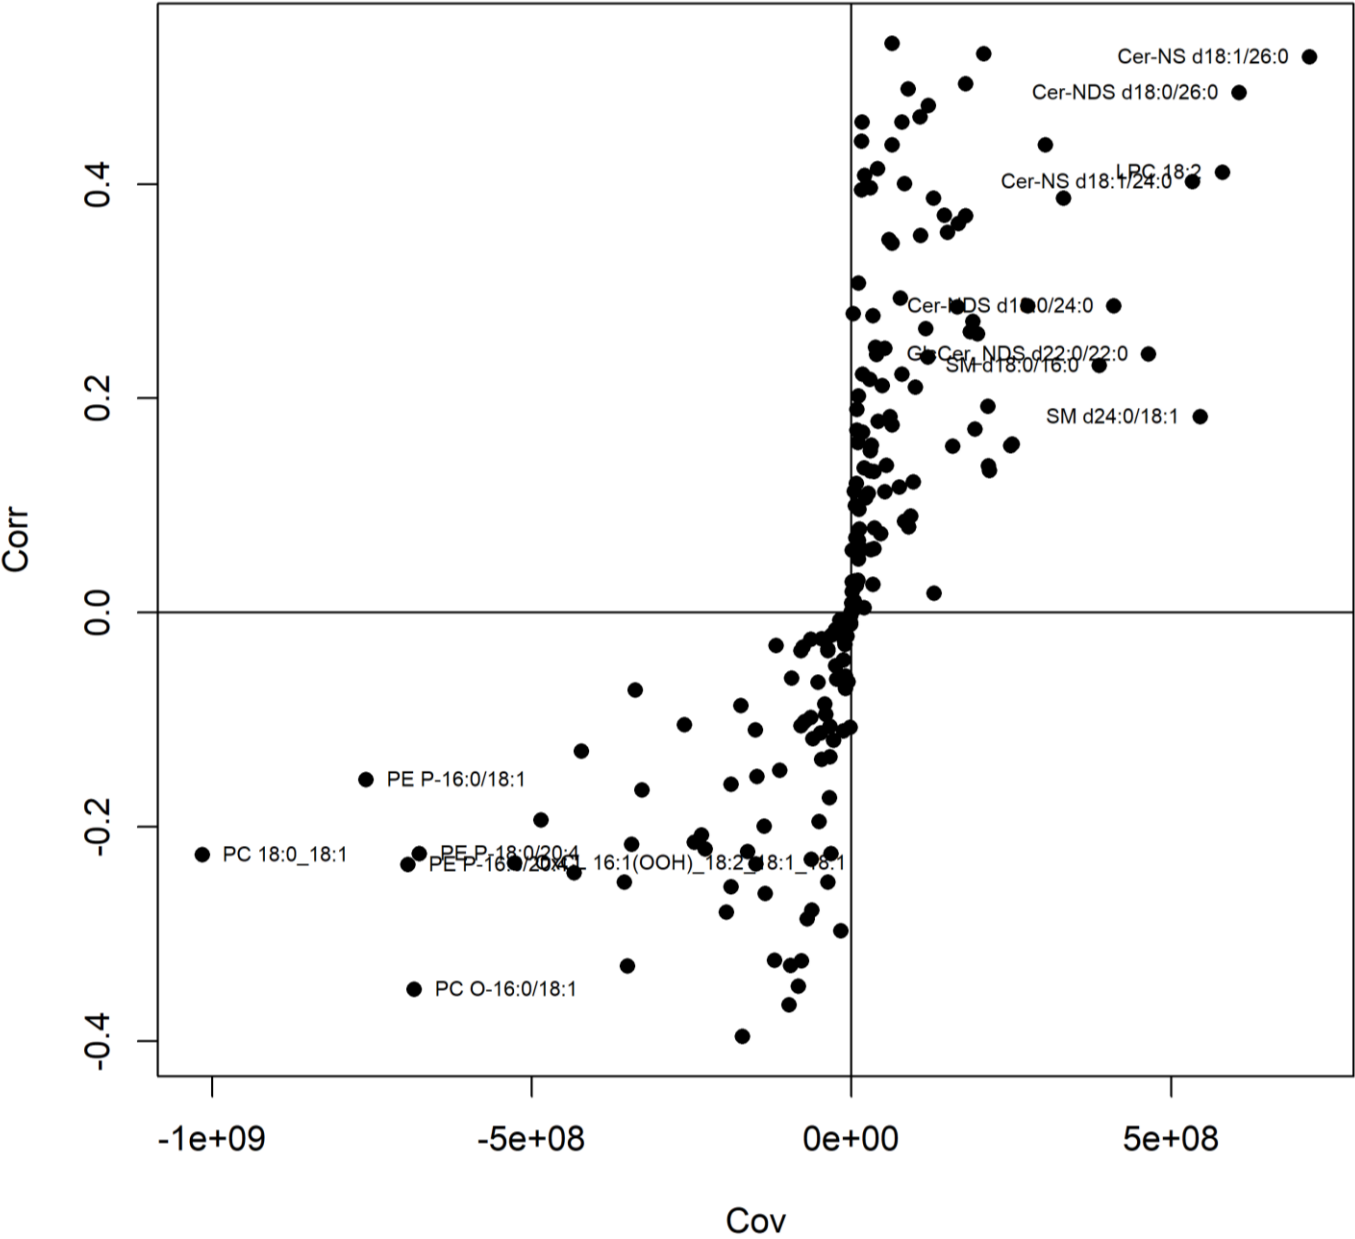

## VIP-plot

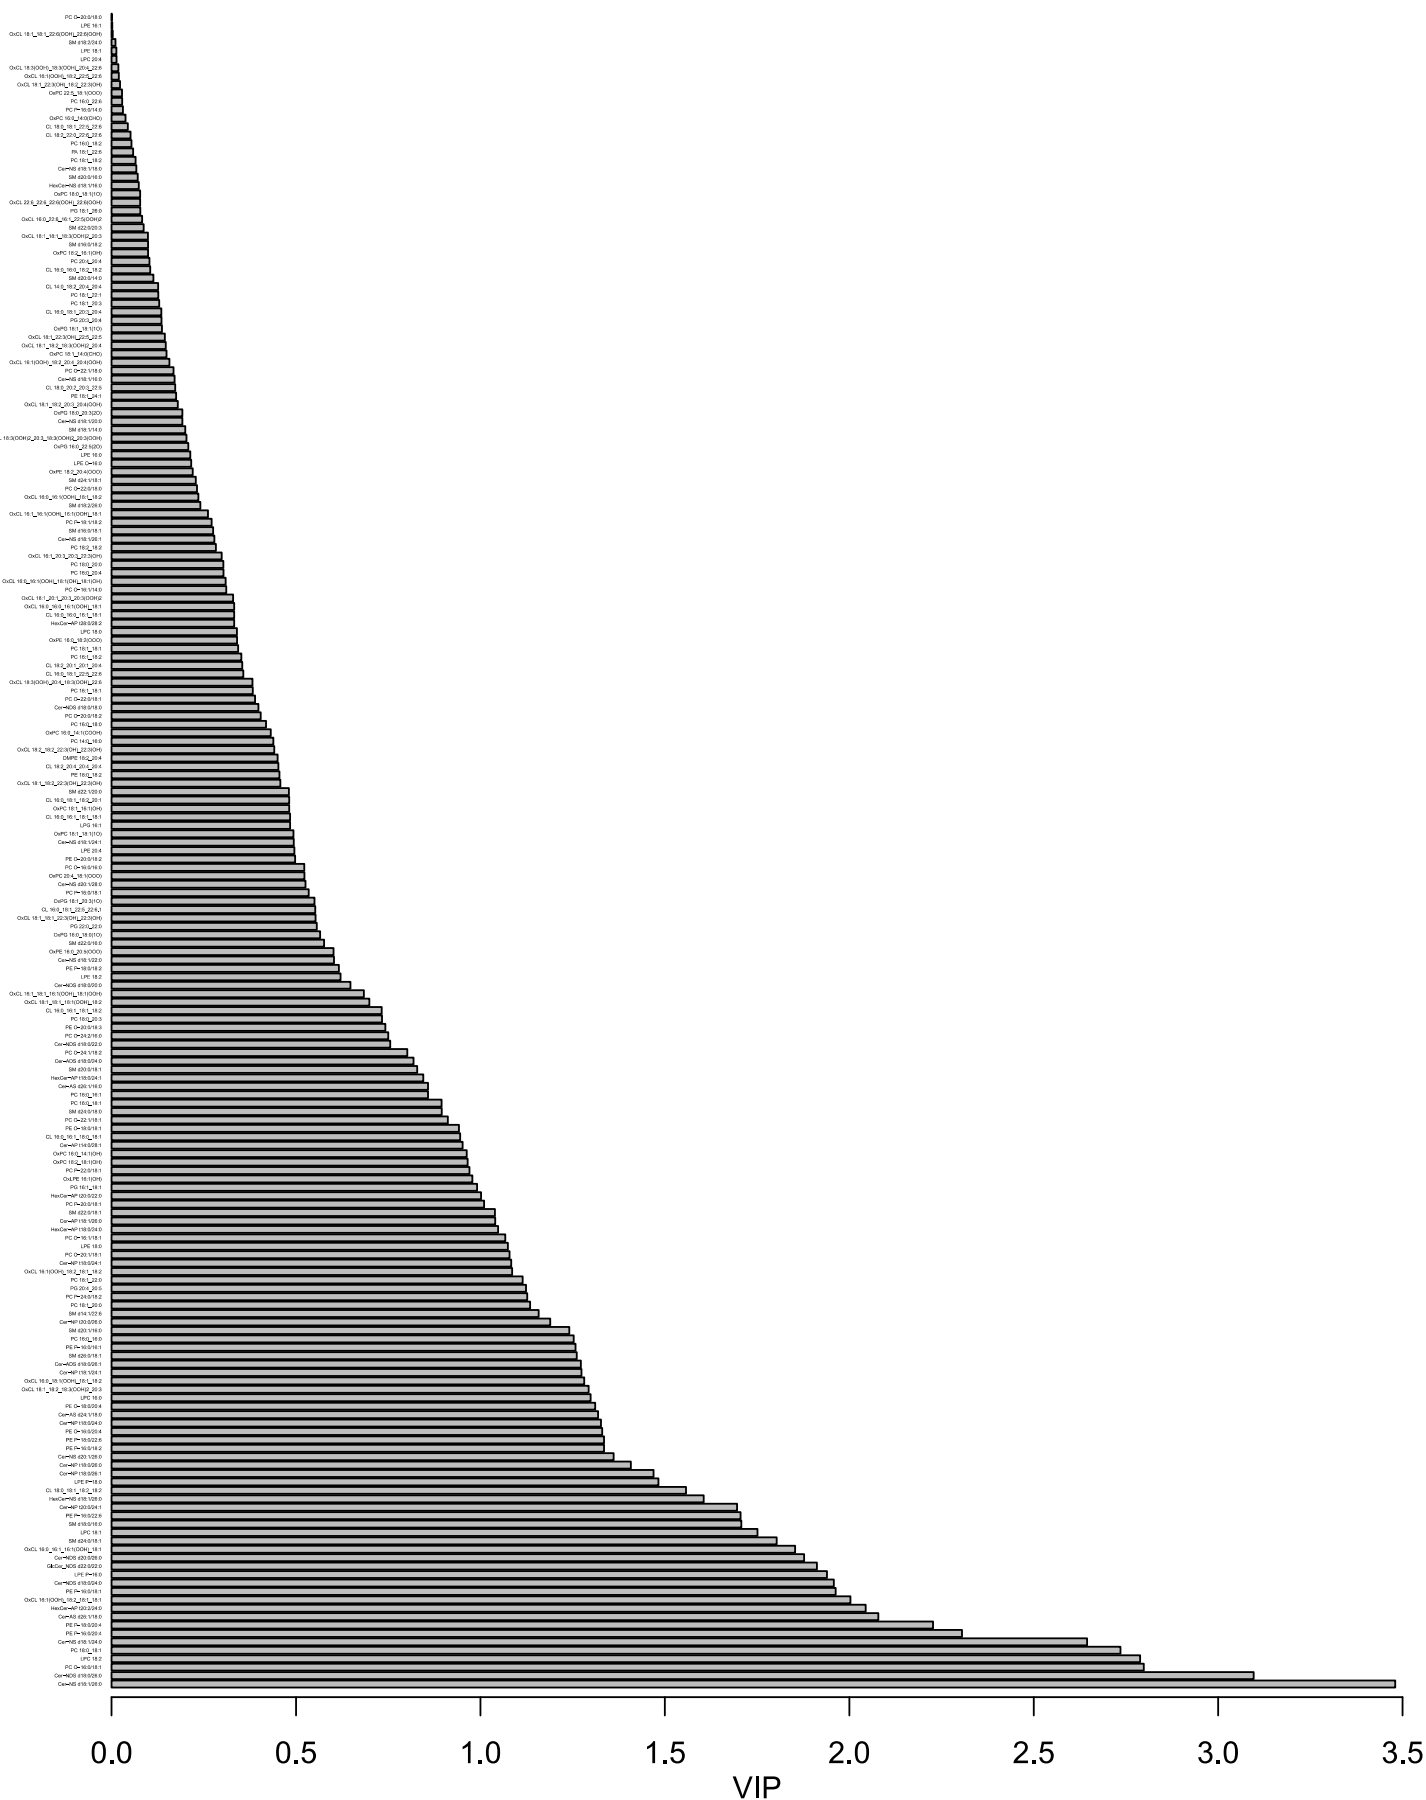

# NILM vs LSIL

$R^2X = 0.74$

$R^2Y = 0.16$

$Q^2Y = -0.36$

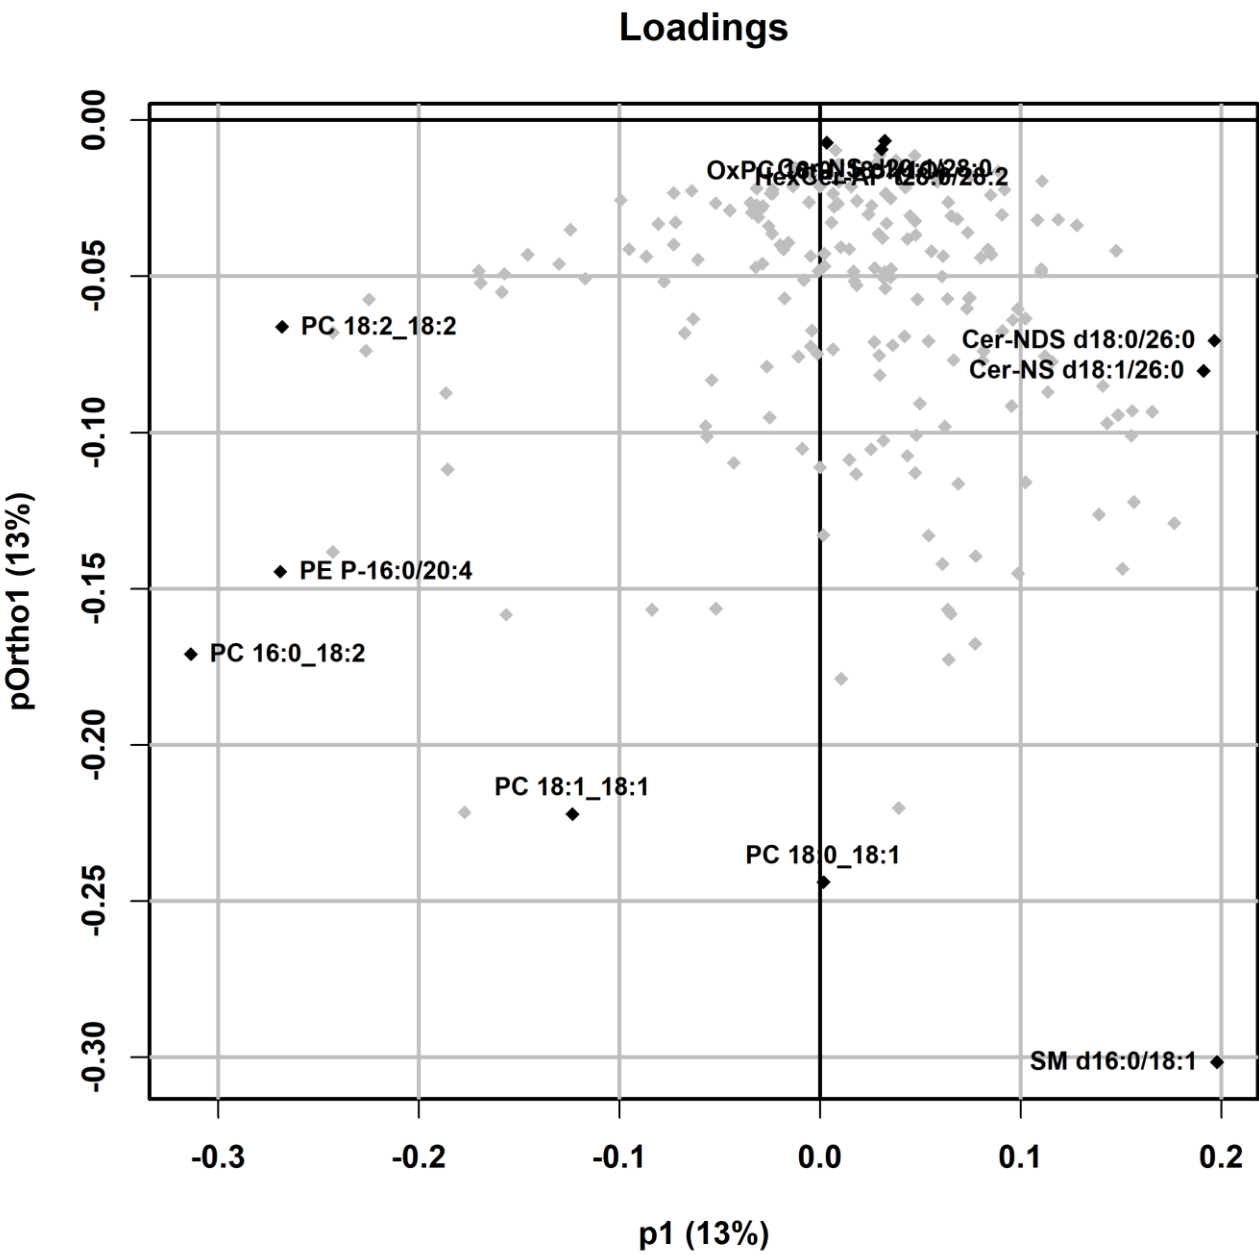

S-plot

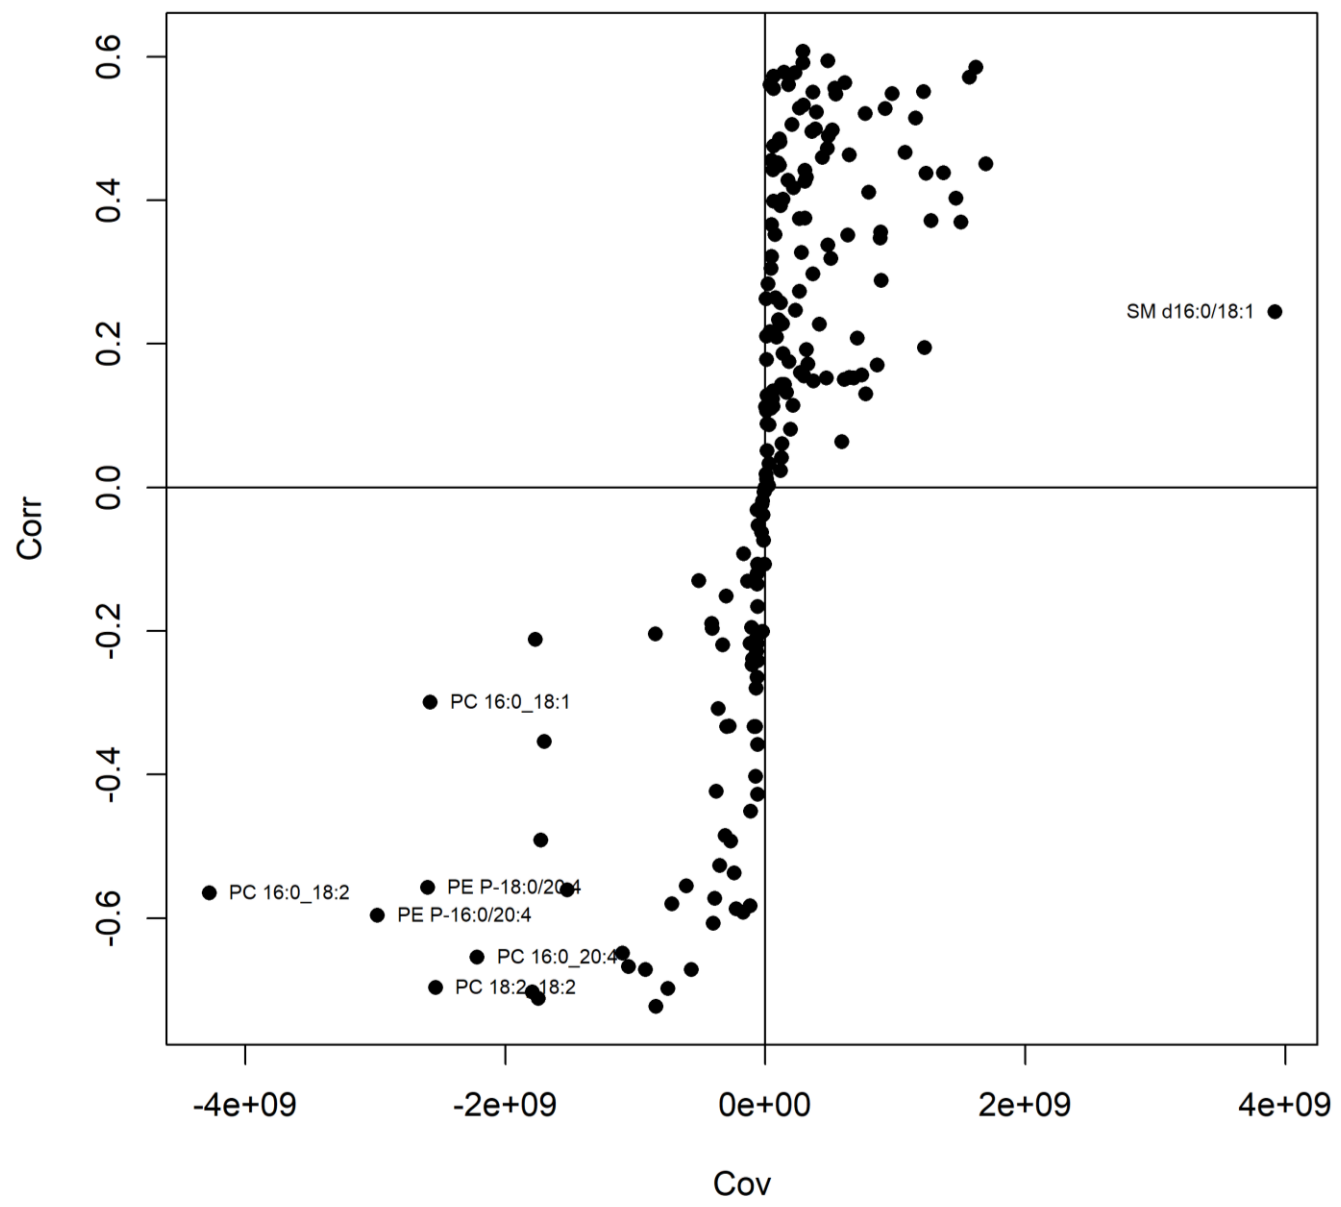

## VIP-plot

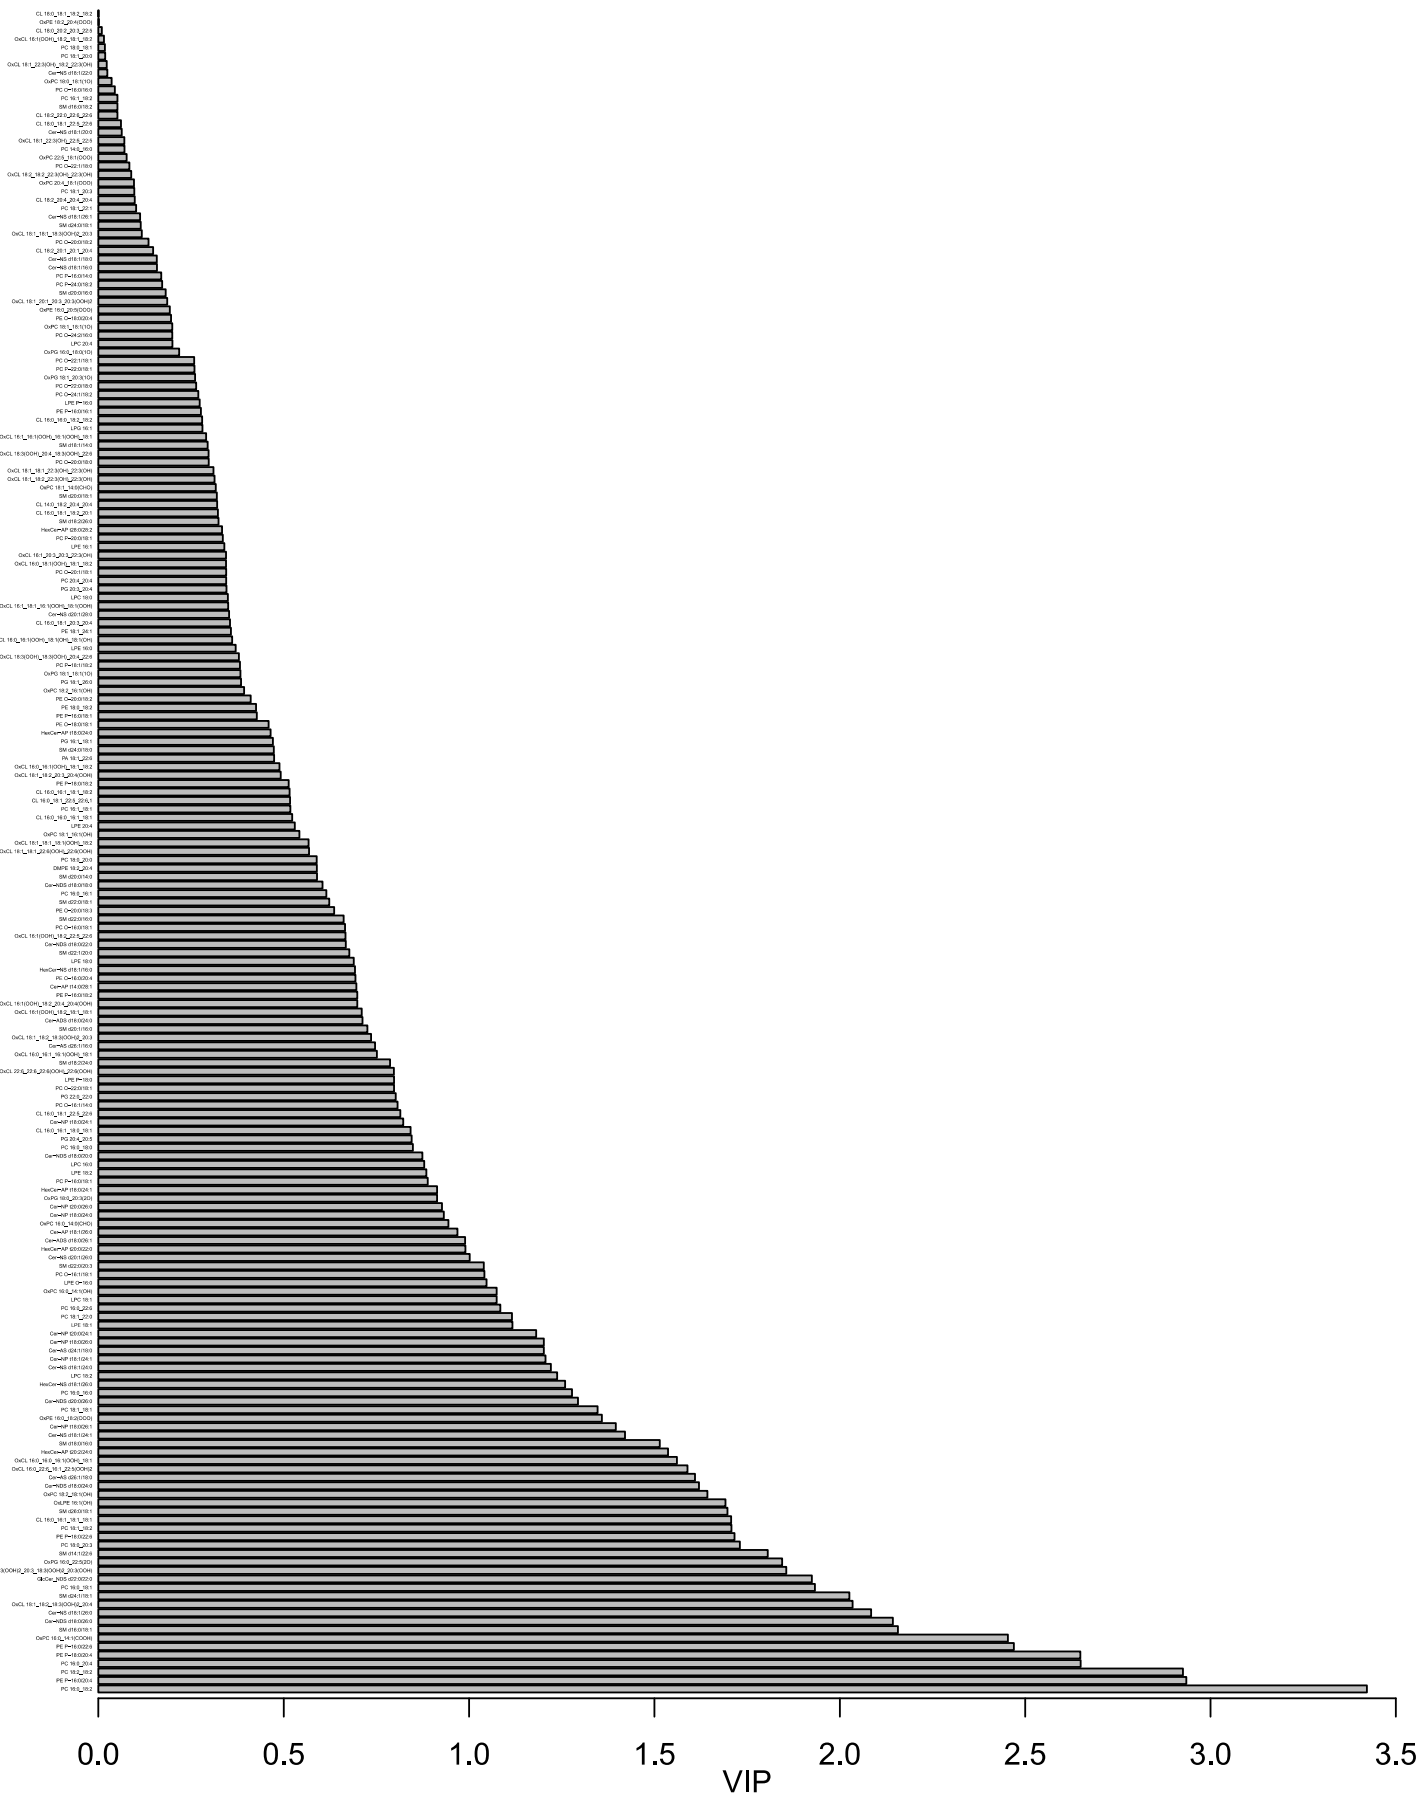

## NILM vs HSIL

$$R^2_X = 0.72$$
$$R^2_Y = 0.19$$
$$Q^2Y = 0.00$$

## Loadings

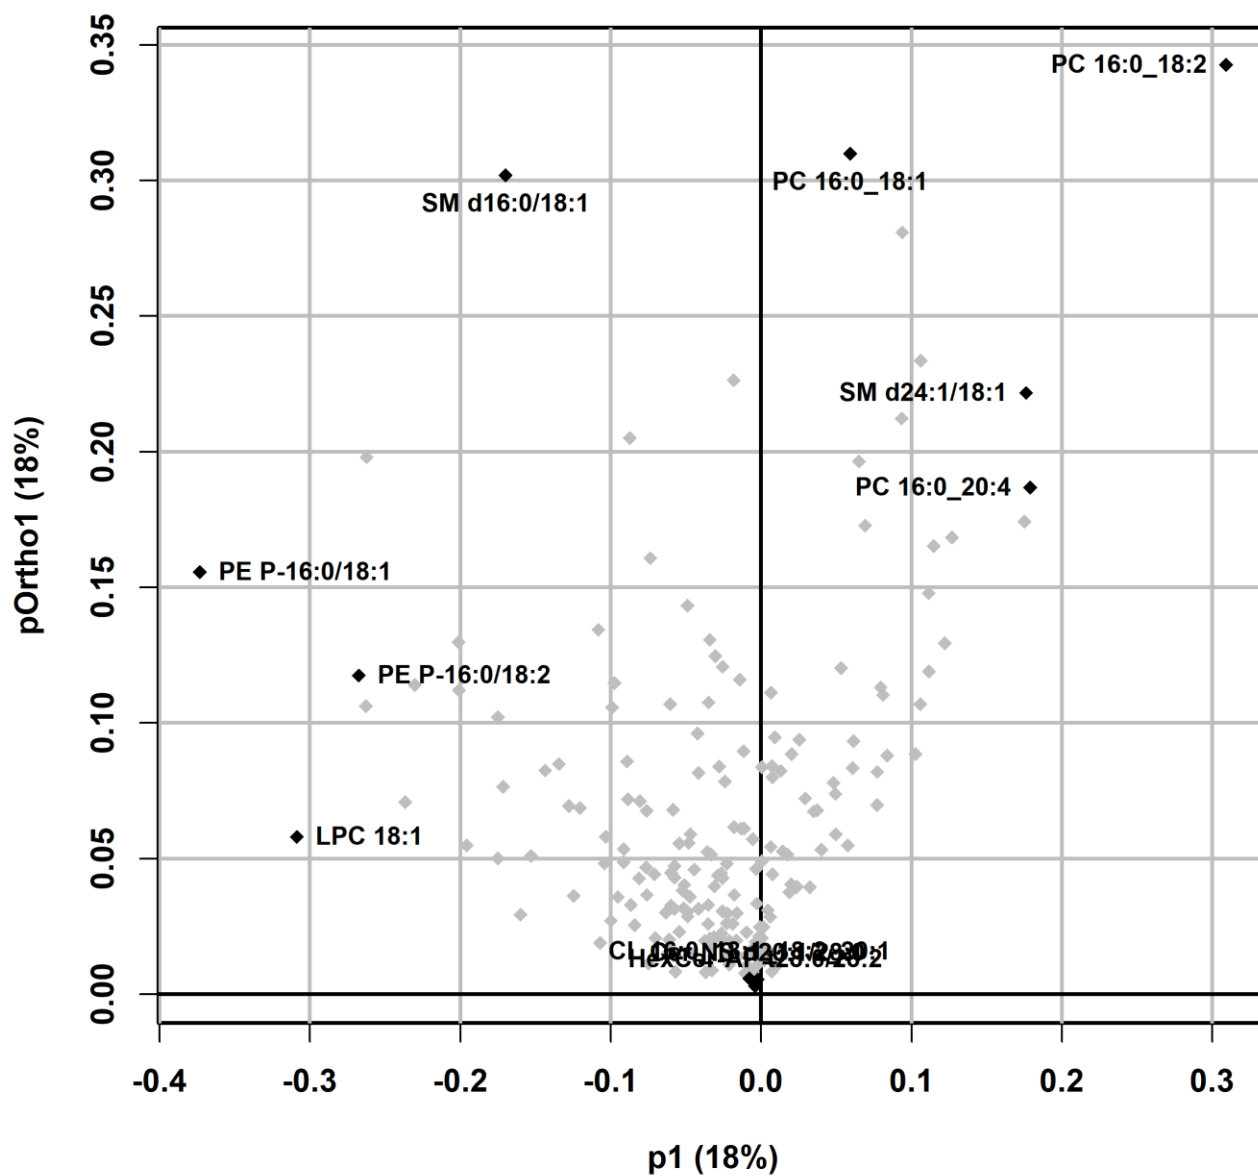

S-plot

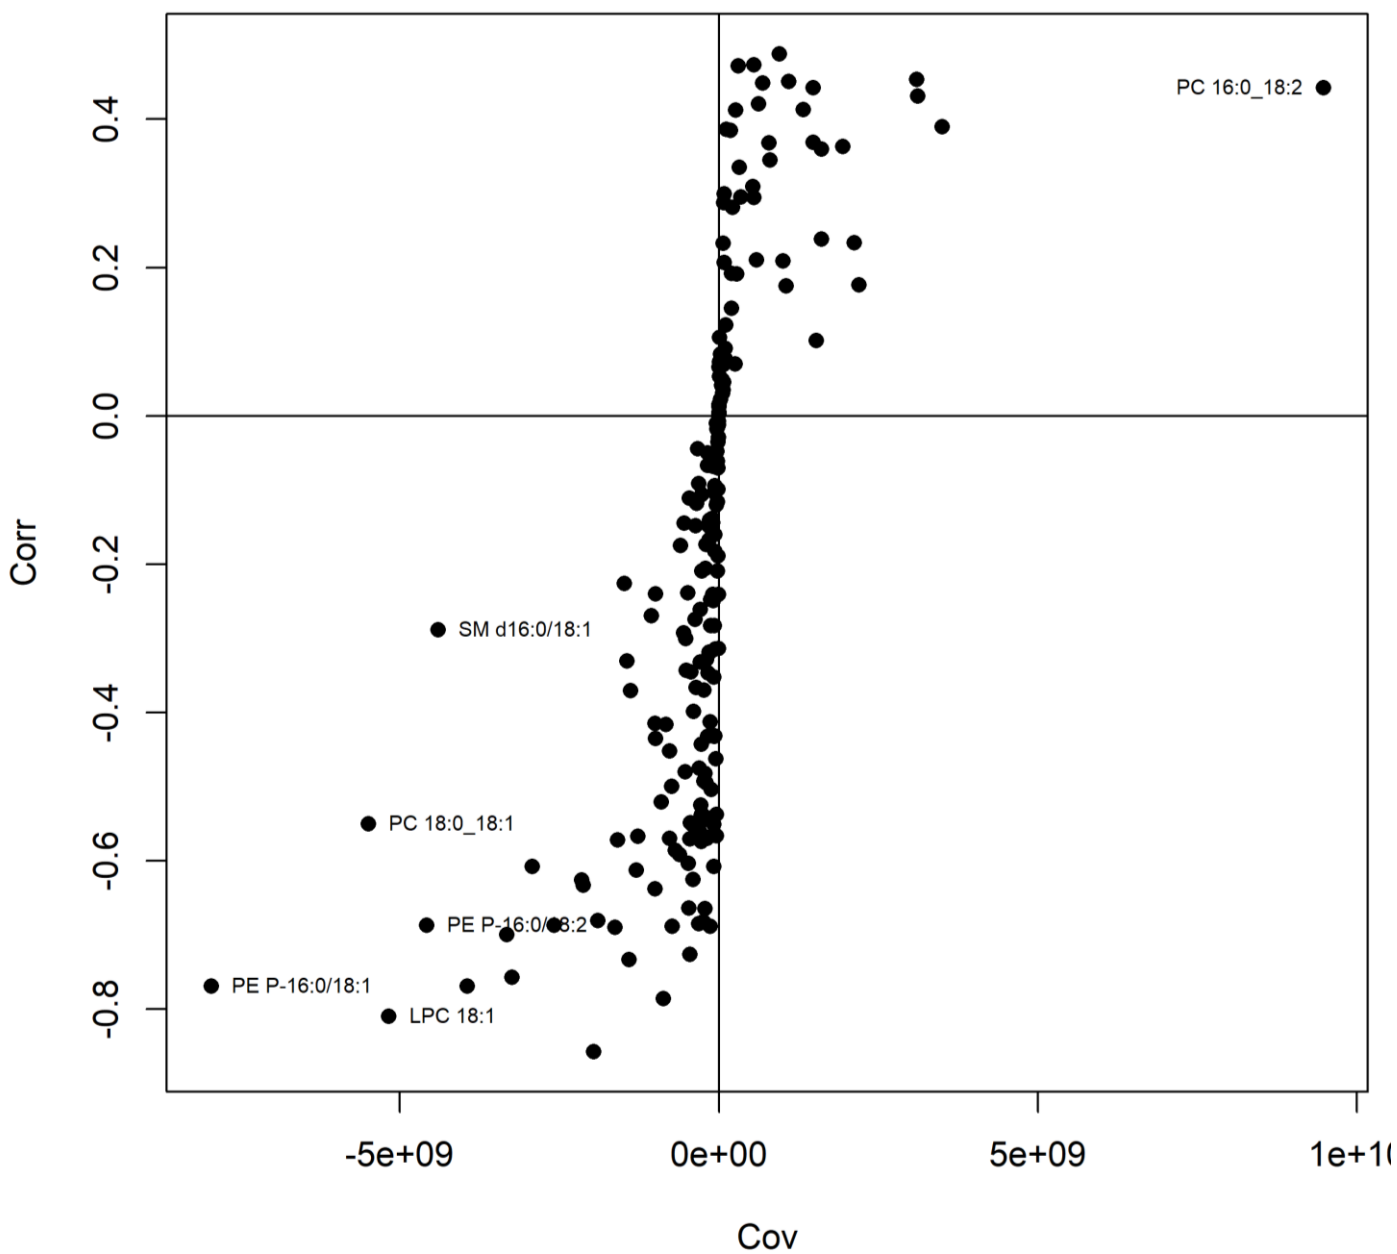



## VIP-plot

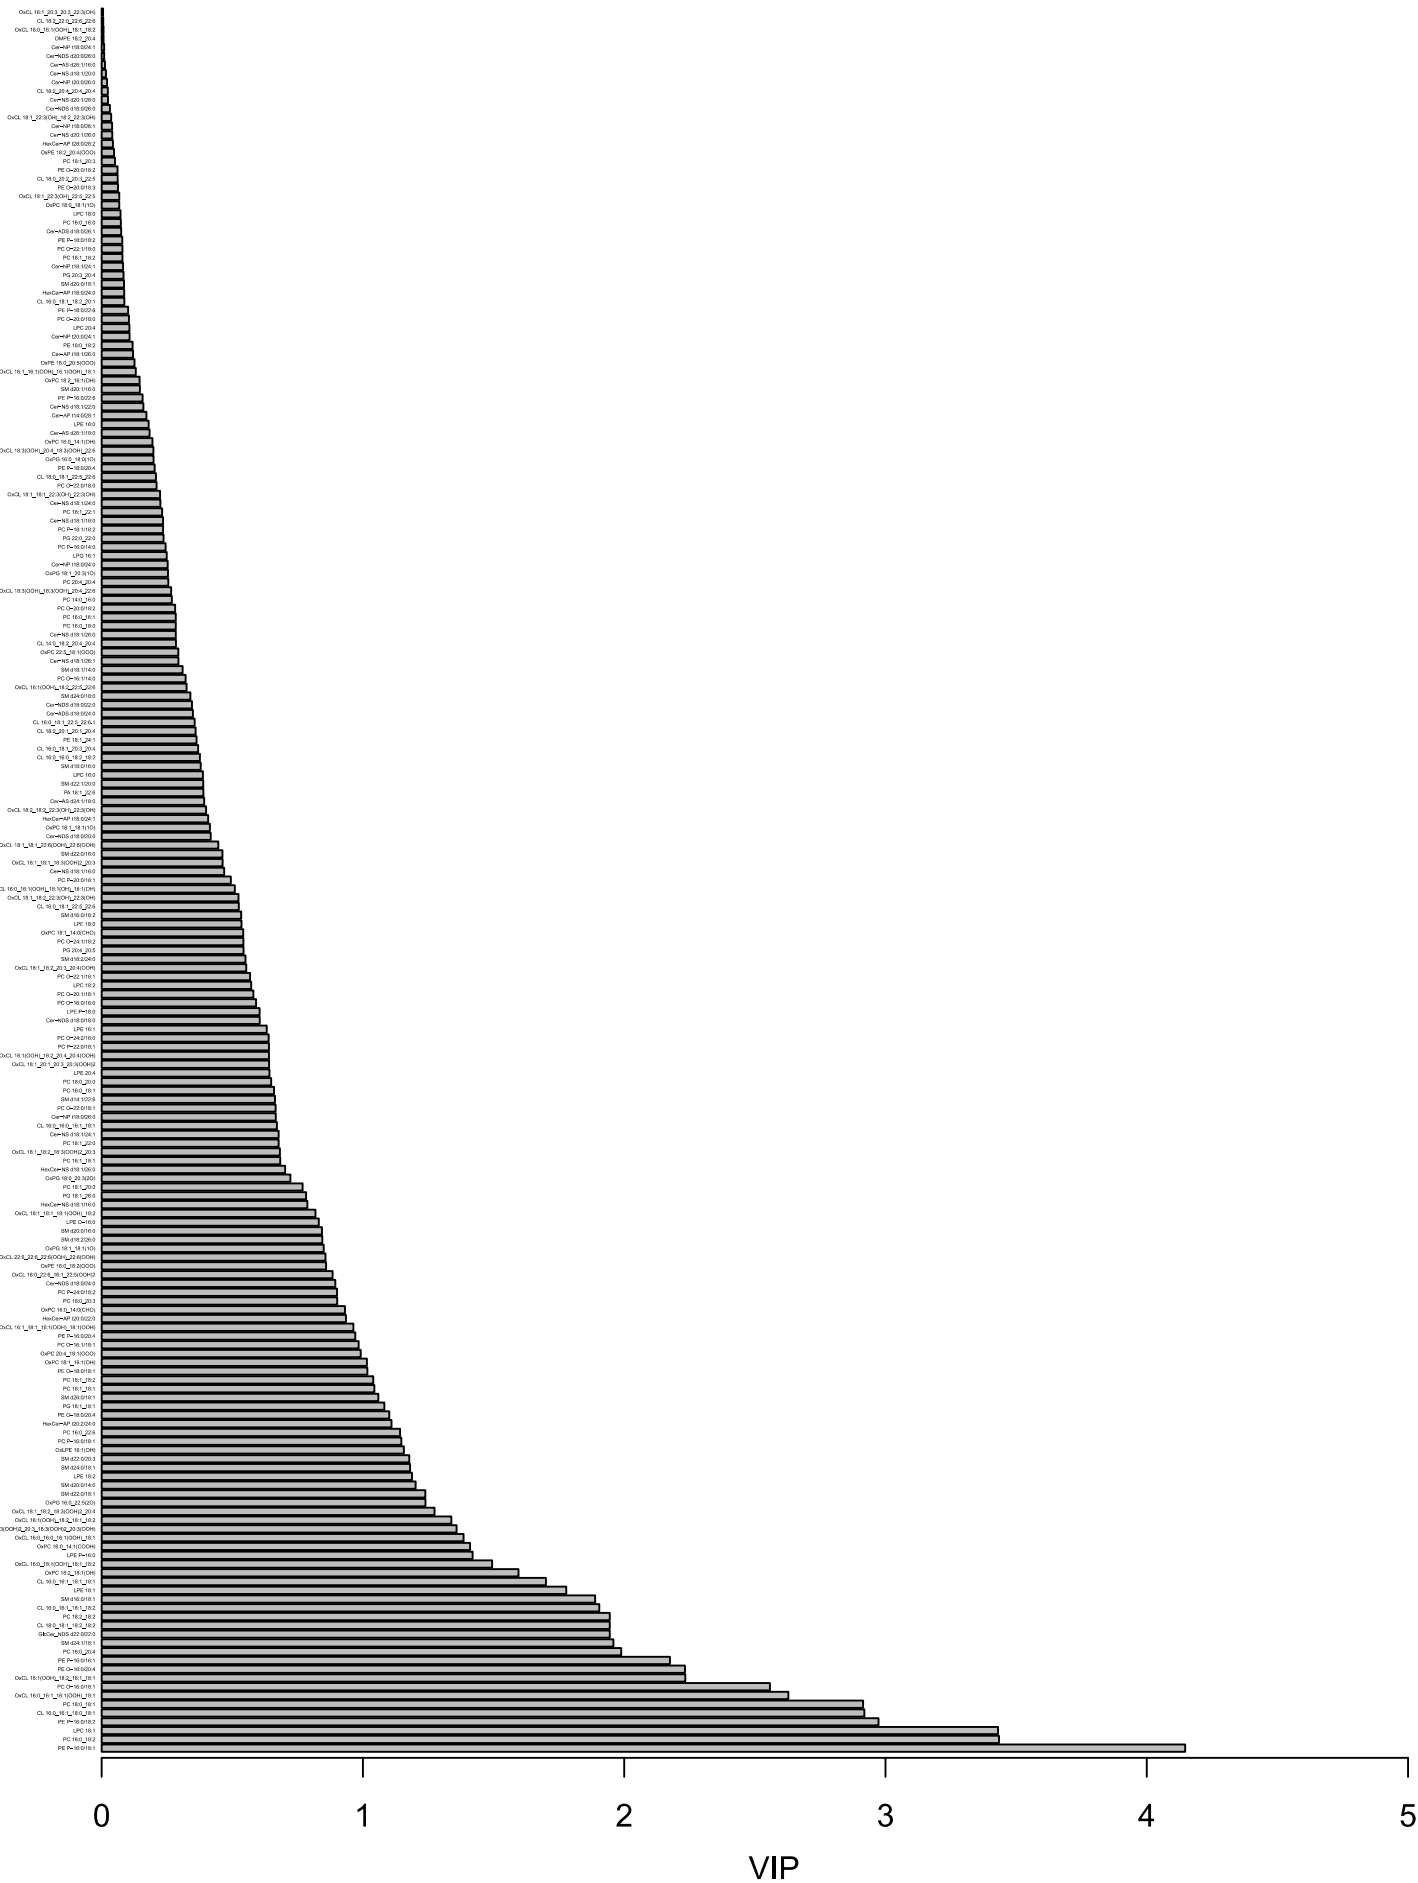

# NILM vs cancer

$R^2X = 0.77$

$R^2Y = 0.29$

$Q^2Y = 0.14$

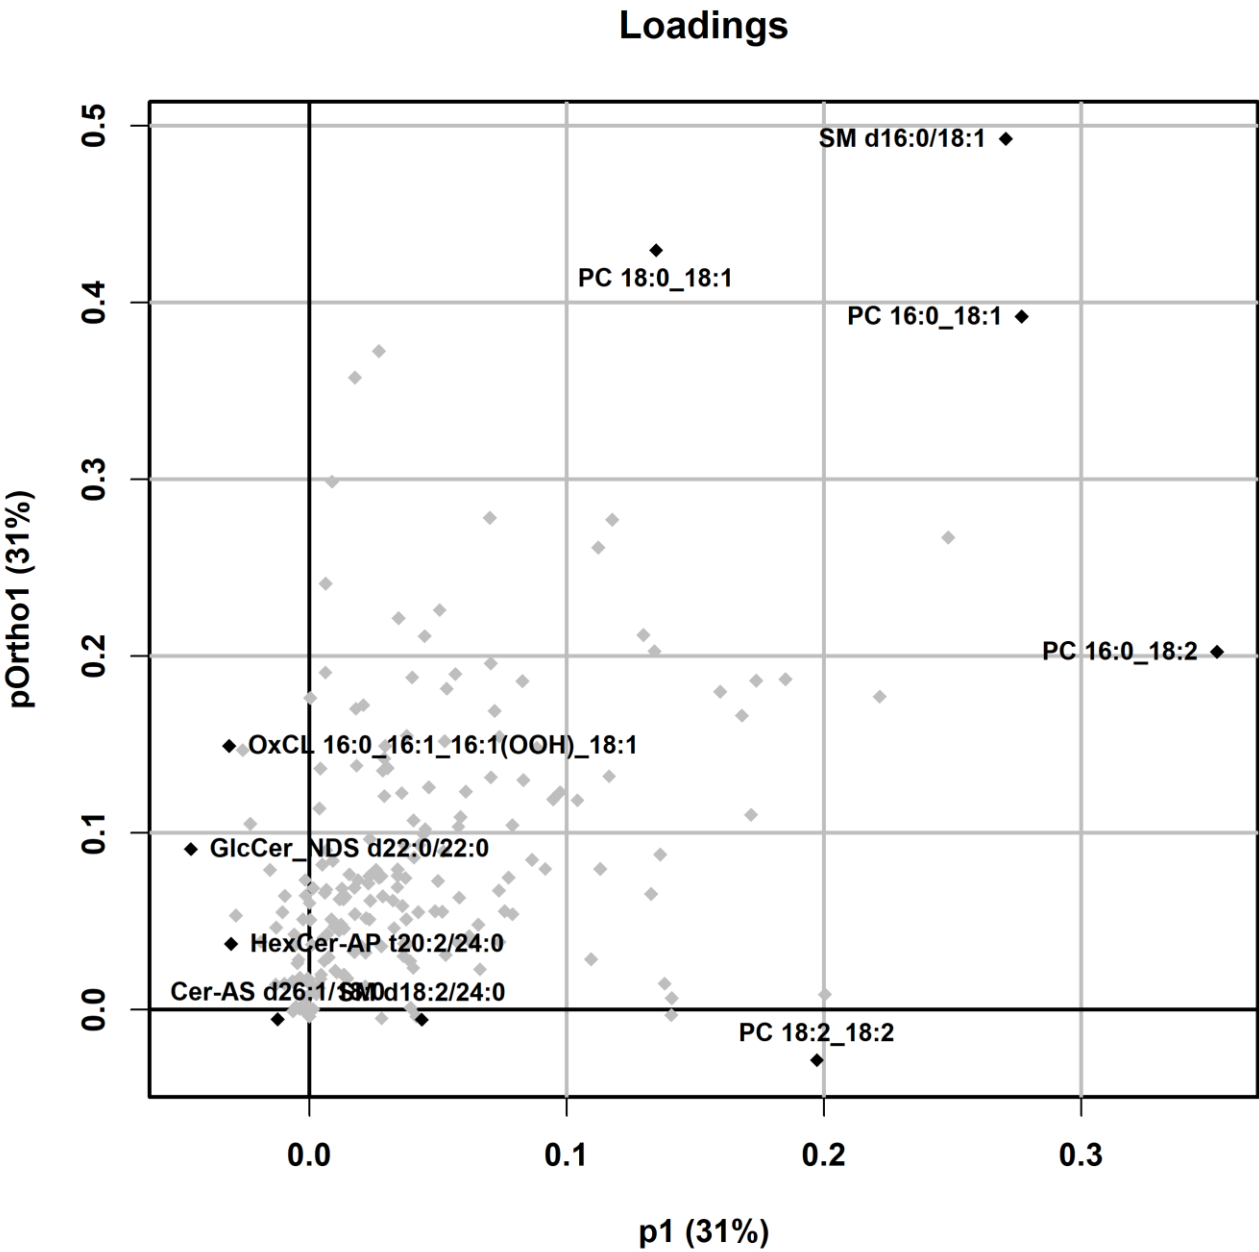

# S-plot

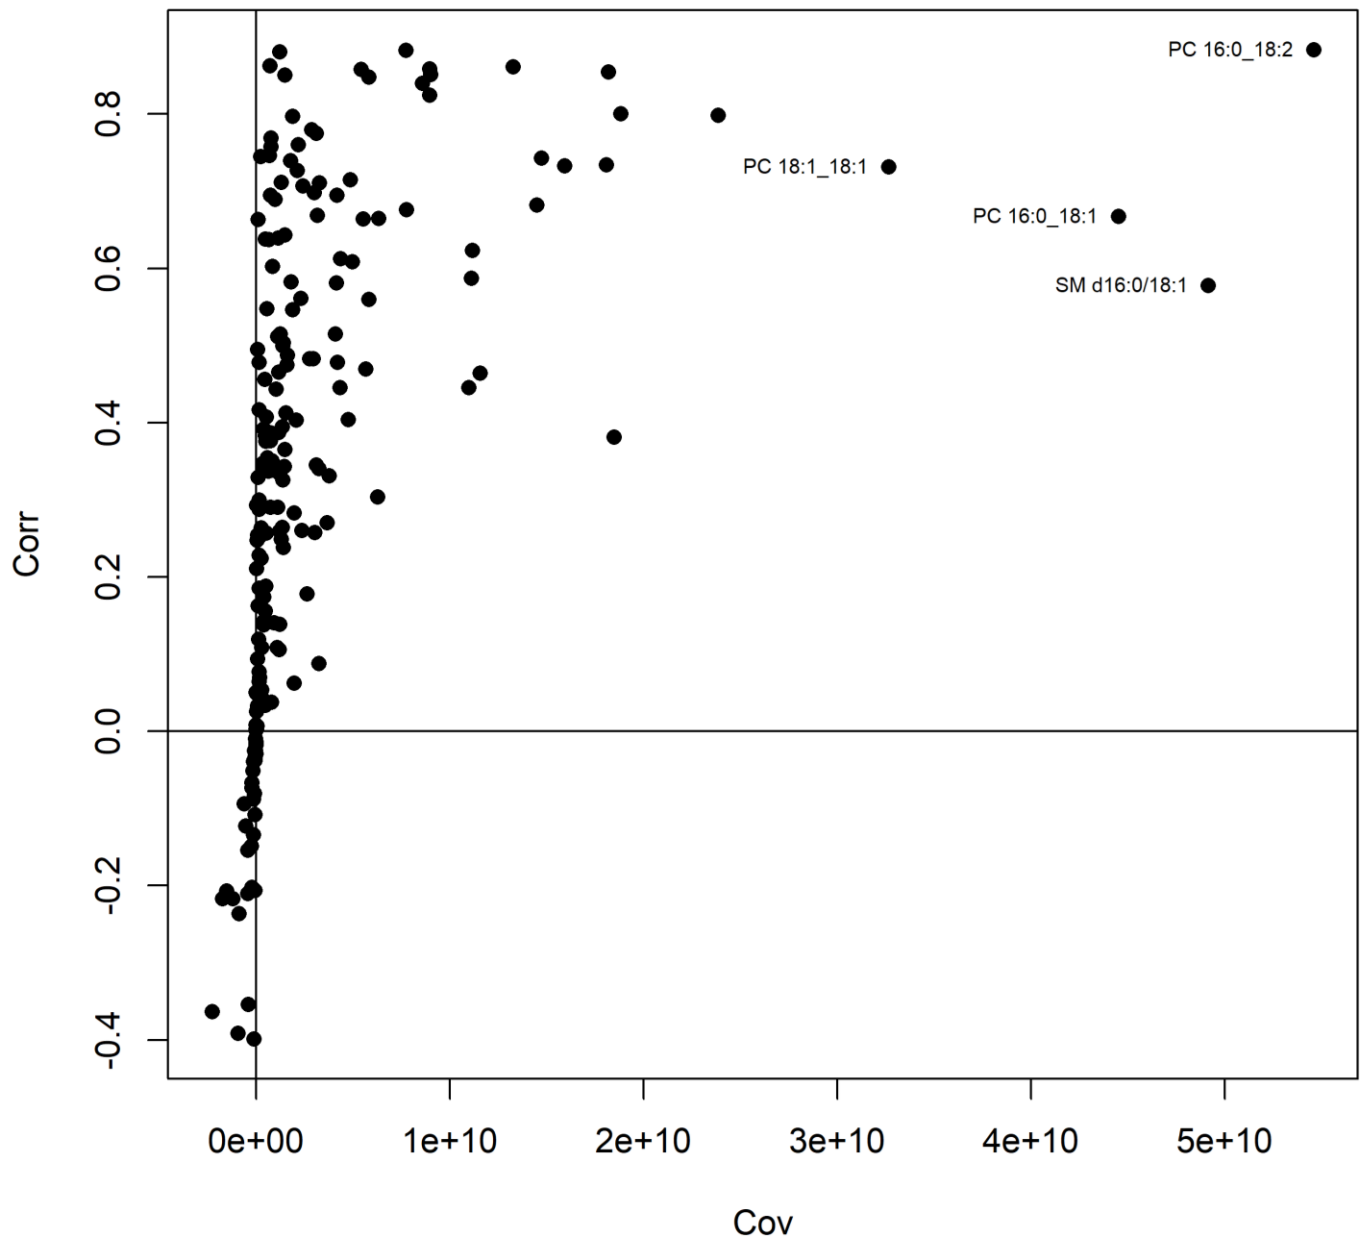

# VIP-plot

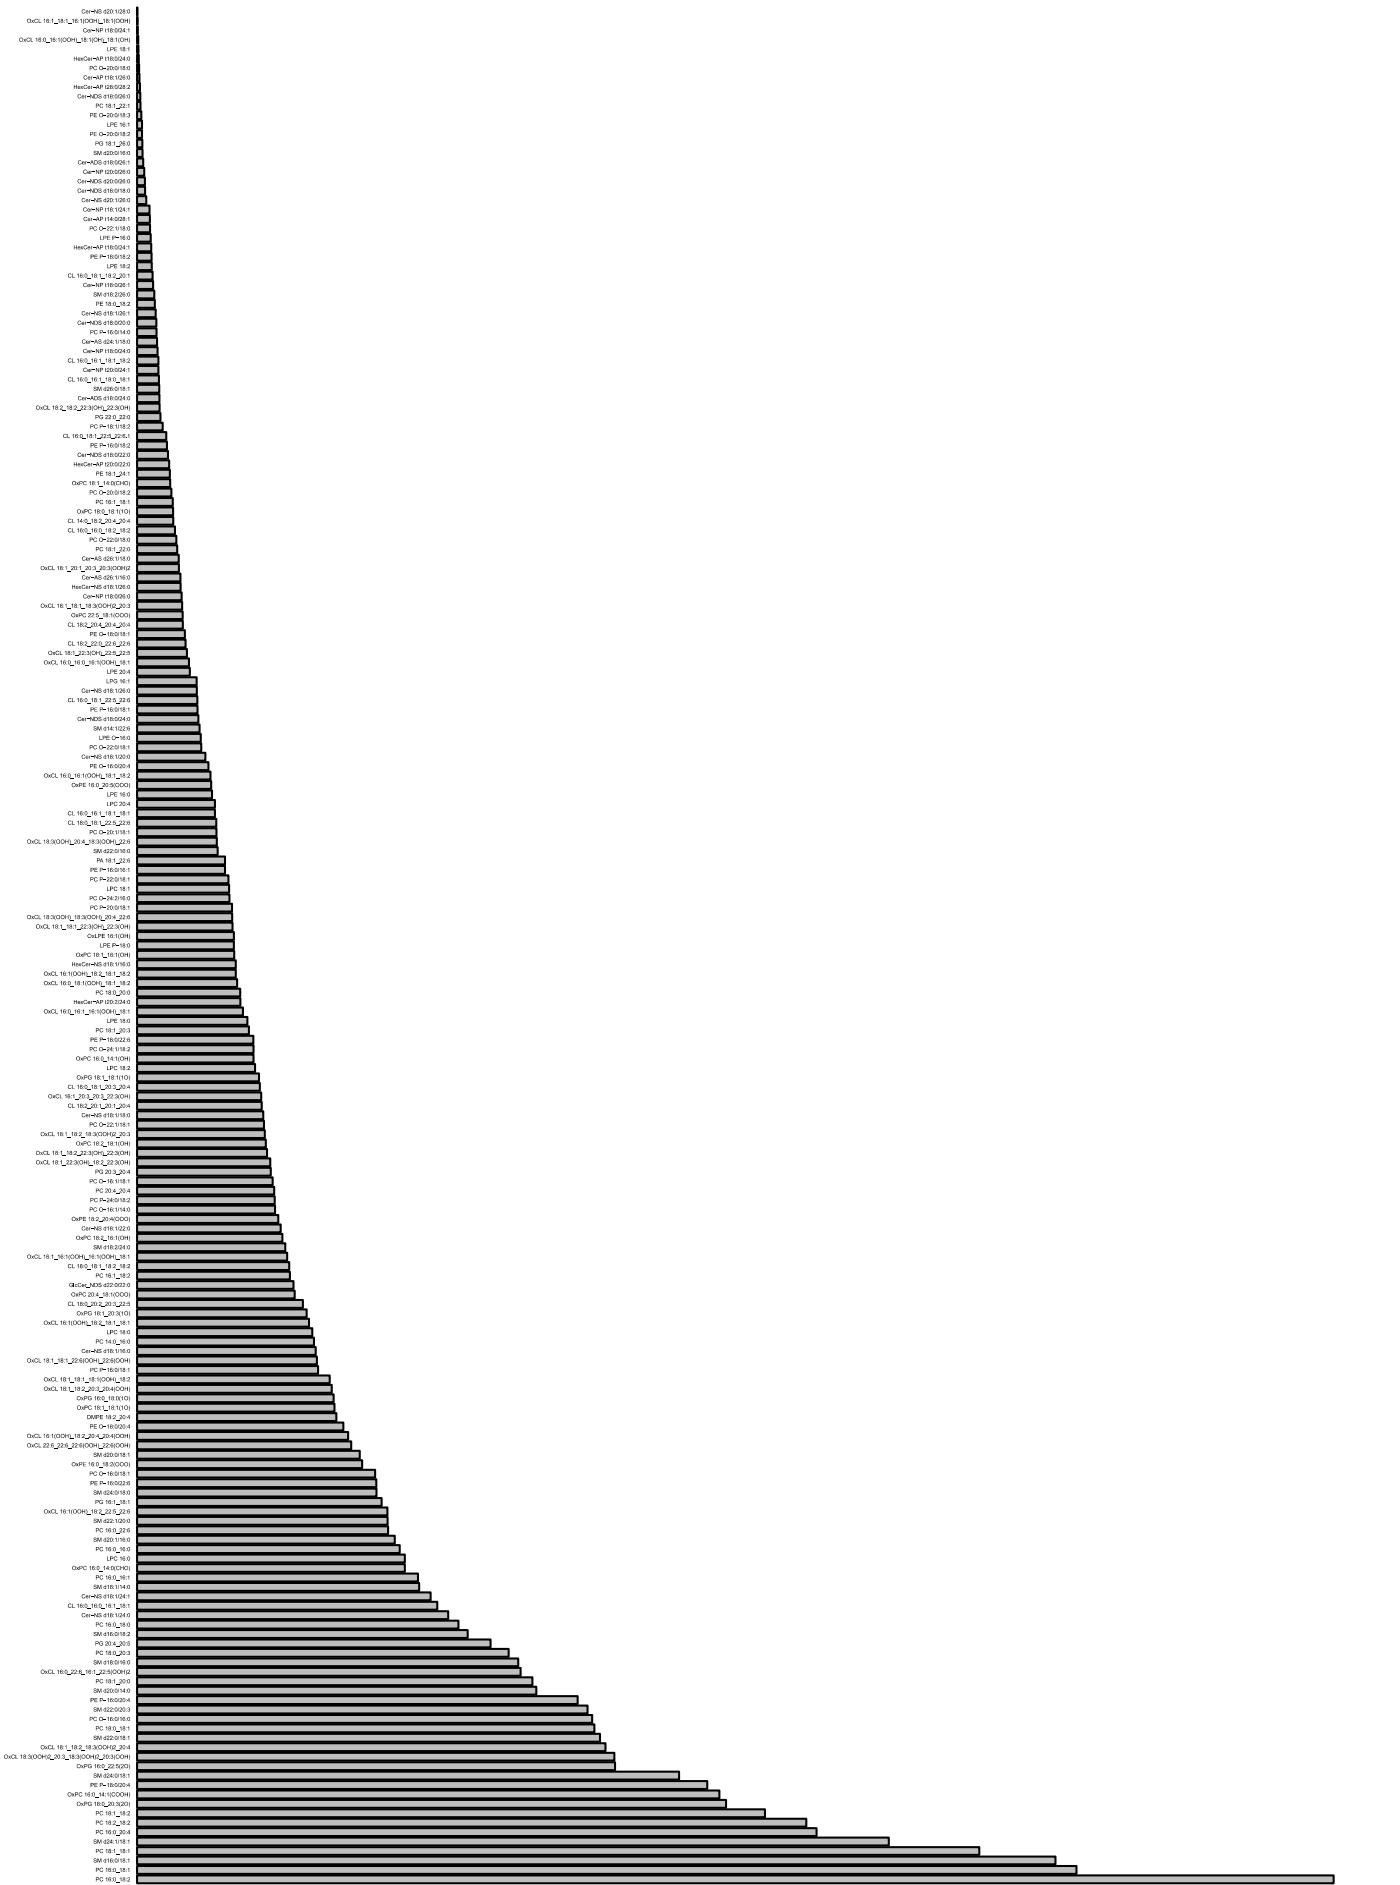

# Cervicitis vs LSIL

$R^2X = 0.77$

$R^2Y = 0.09$

$Q^2Y = -0.04$

Loadings

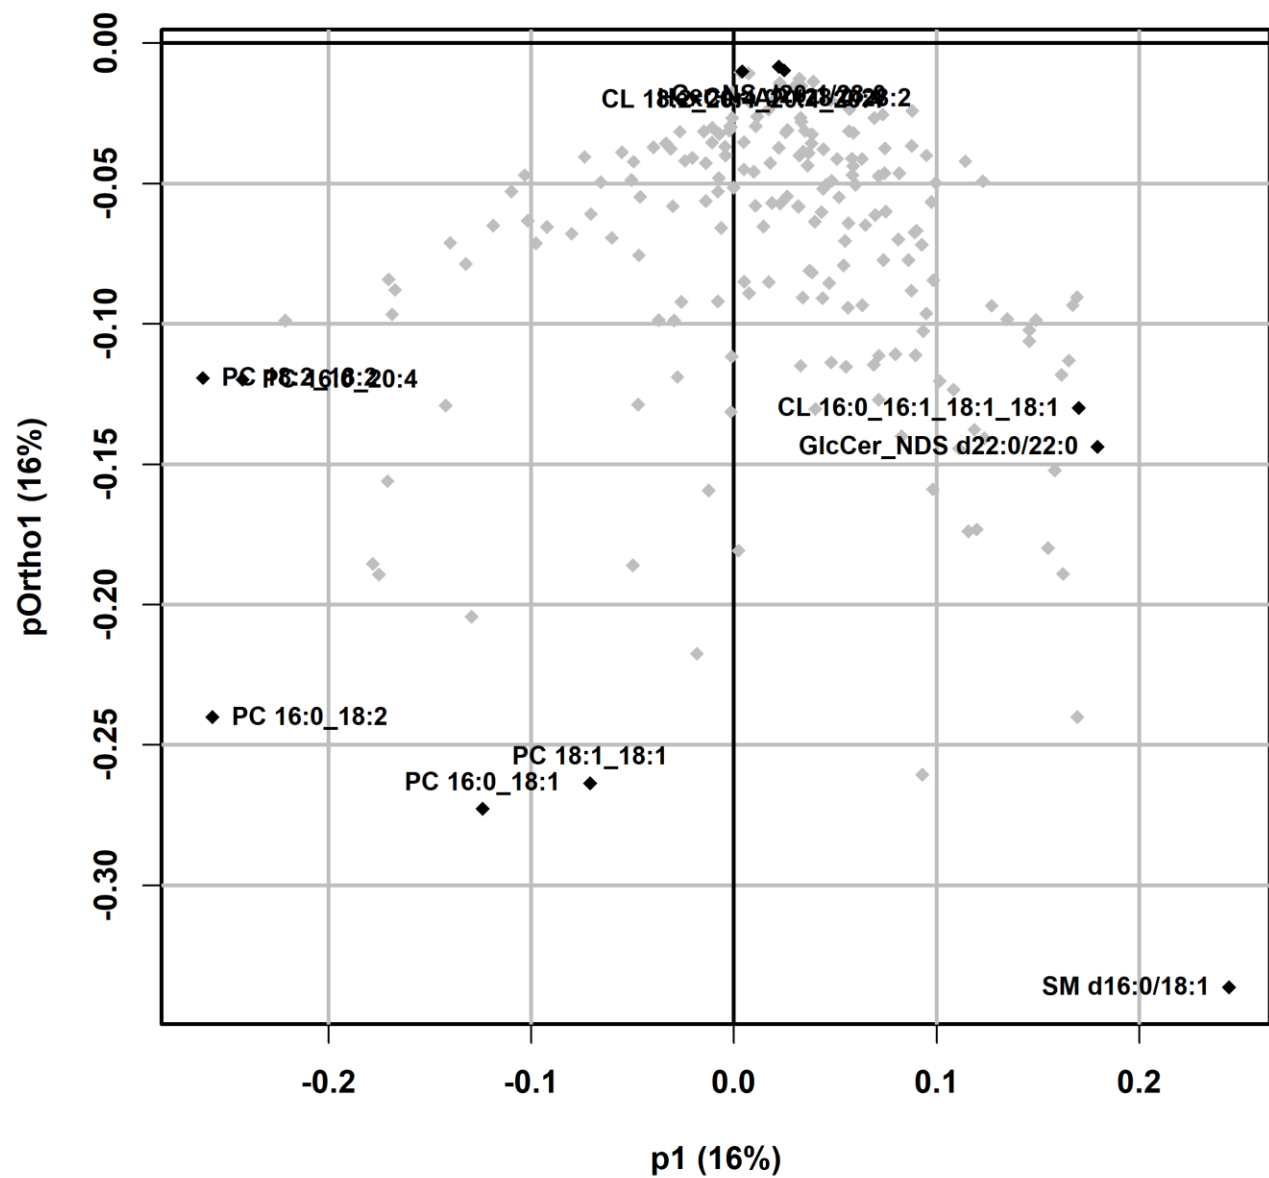

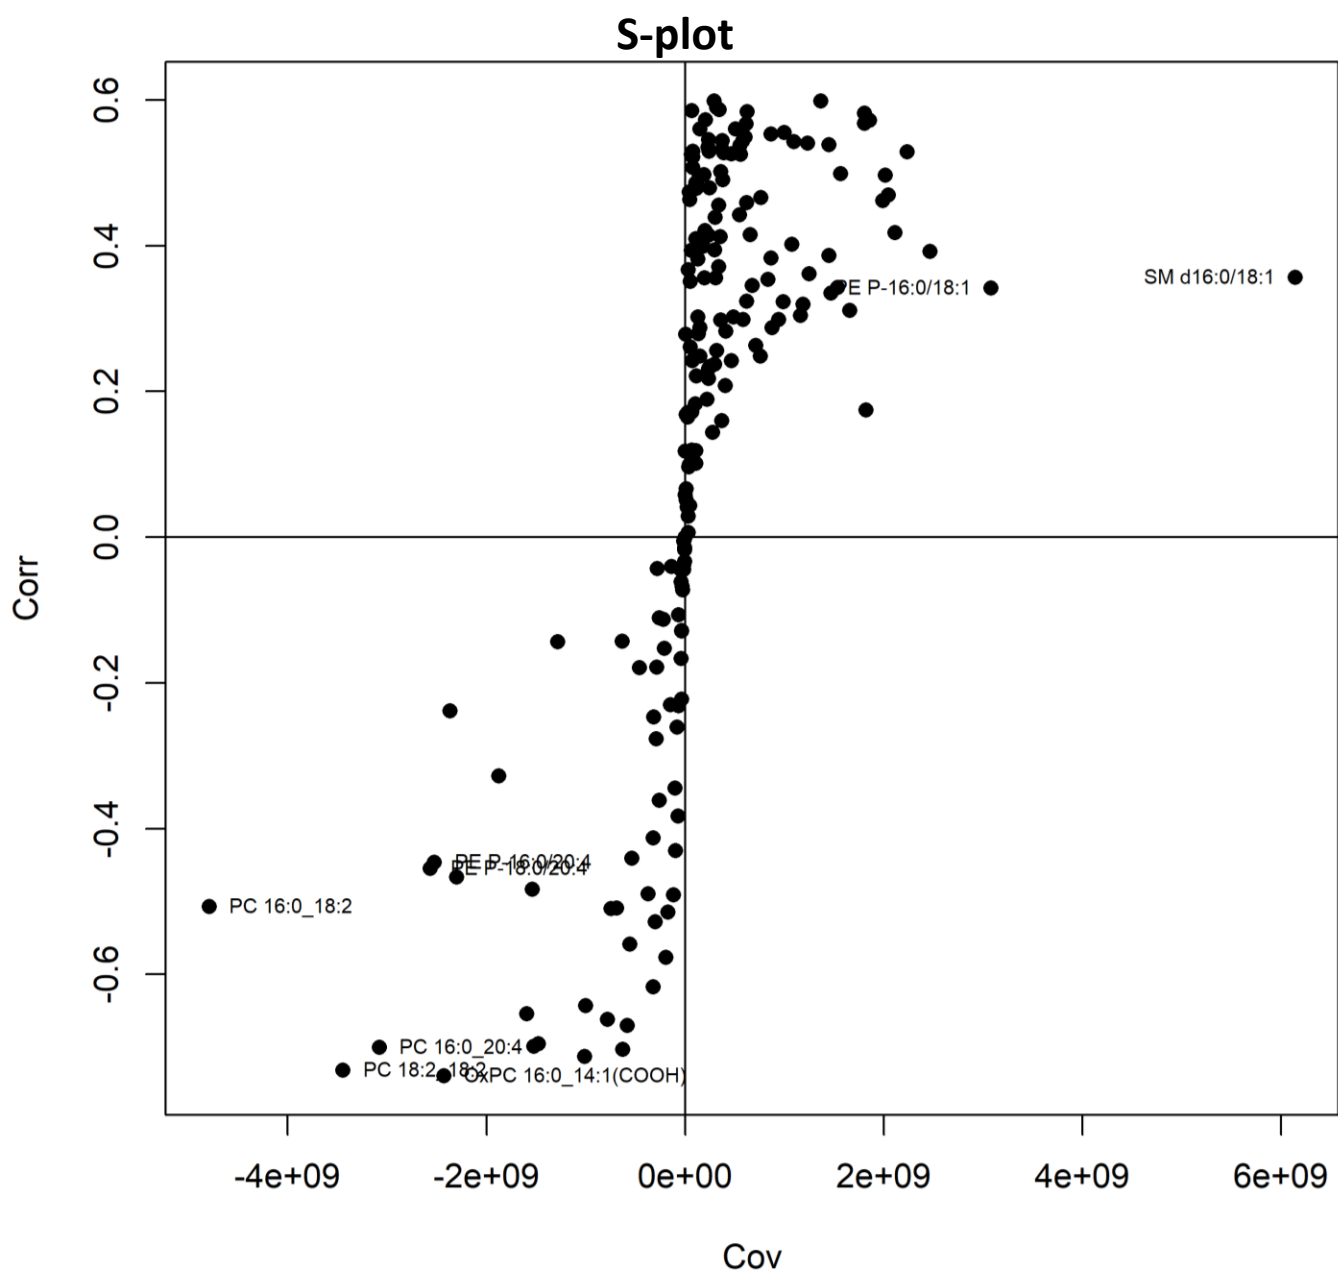

## VIP-plot

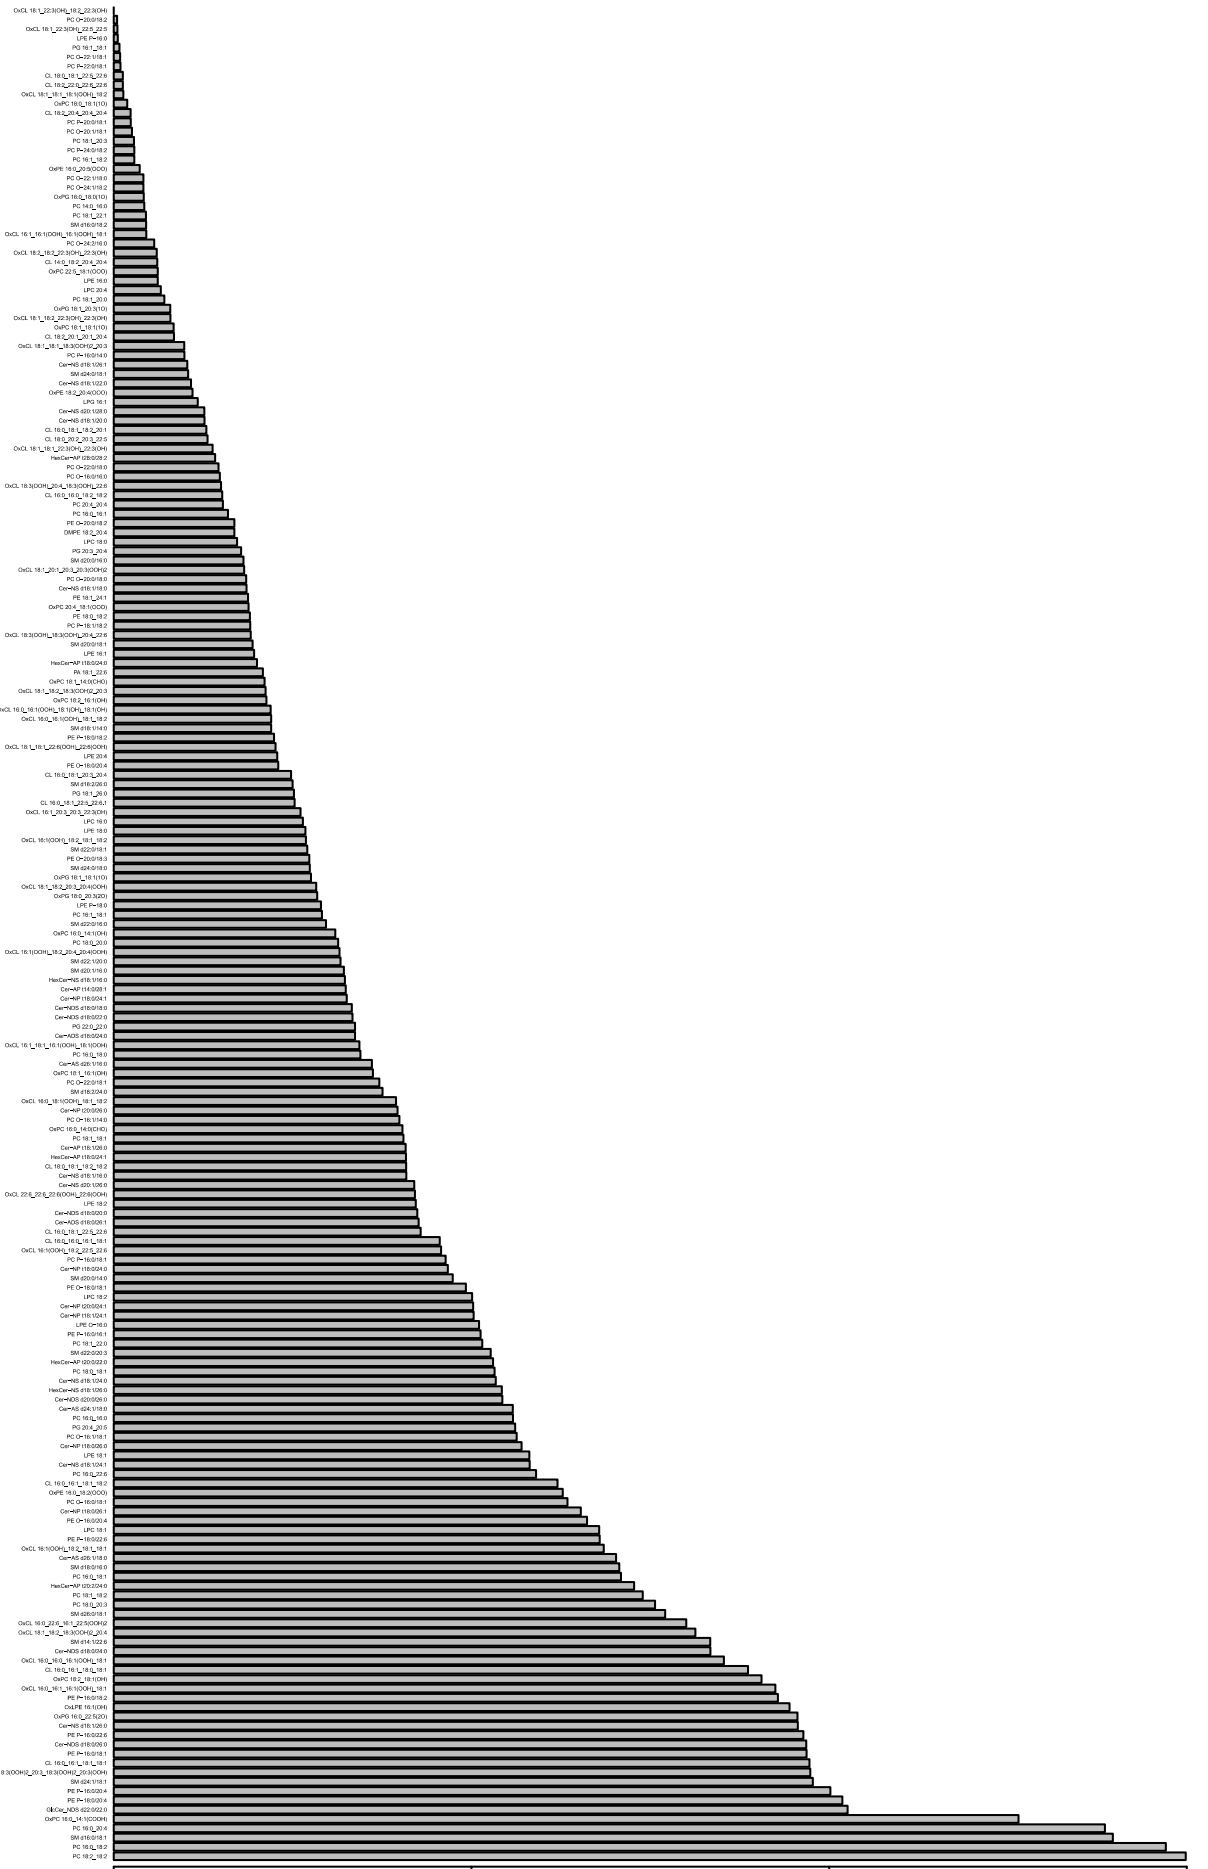

# Cervicitis vs HSIL

$$R^2_X = 0.76$$
$$R^2Y = 0.15$$
$$Q^2Y = -0.08$$
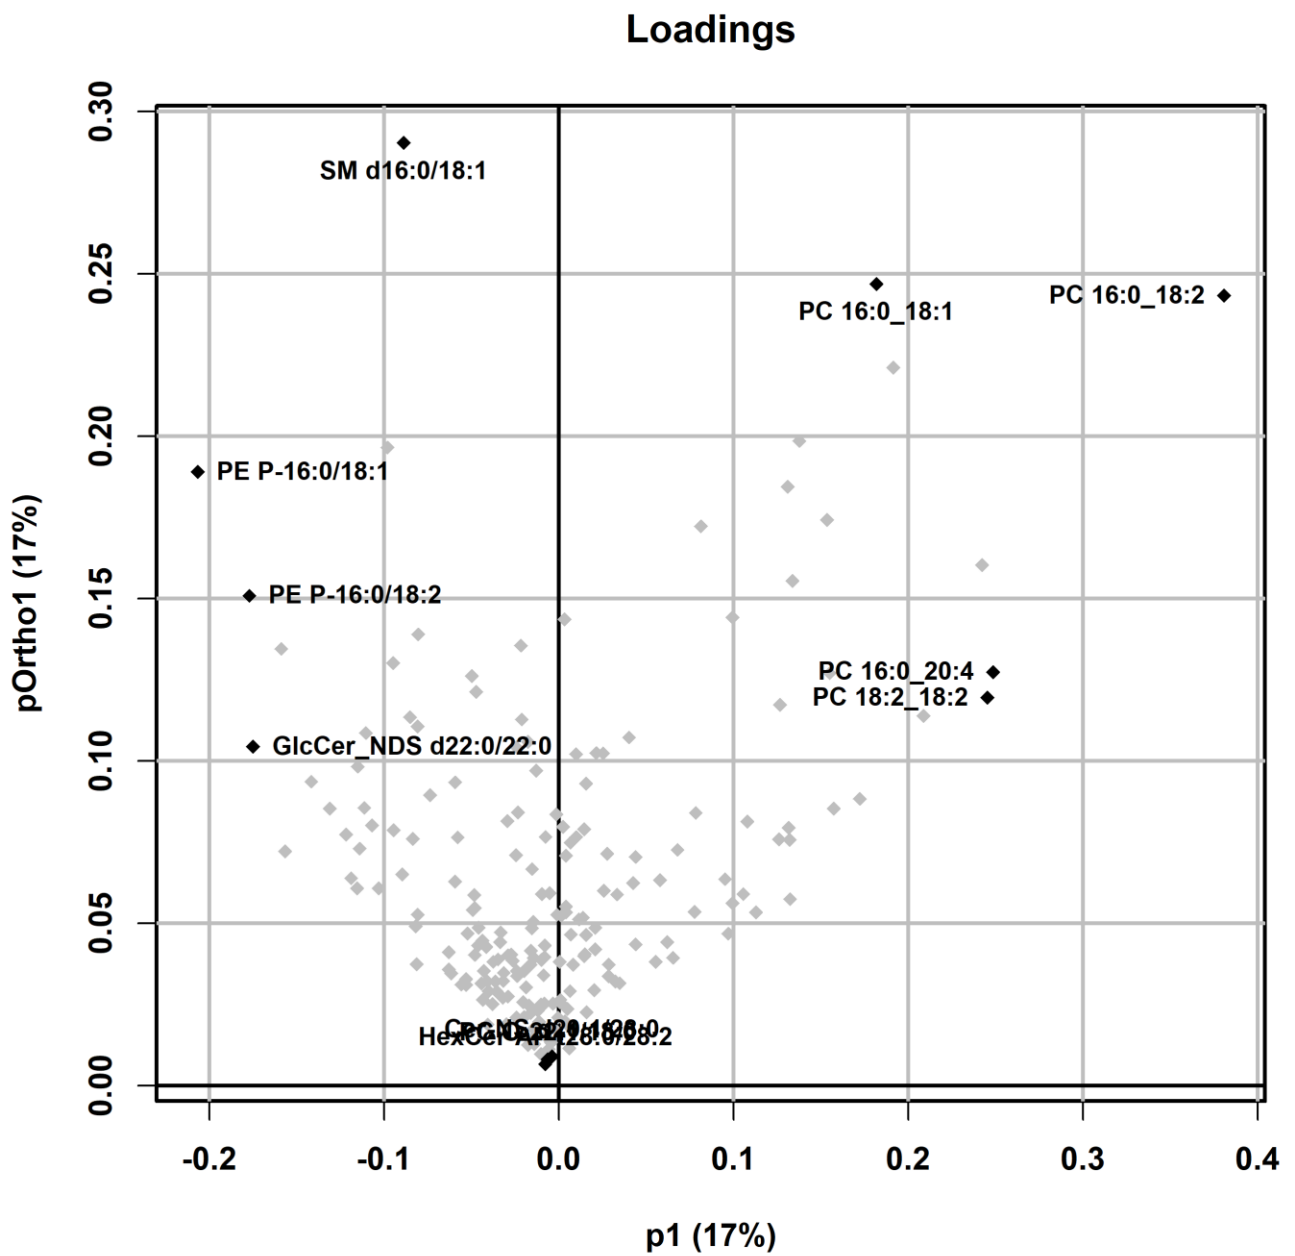



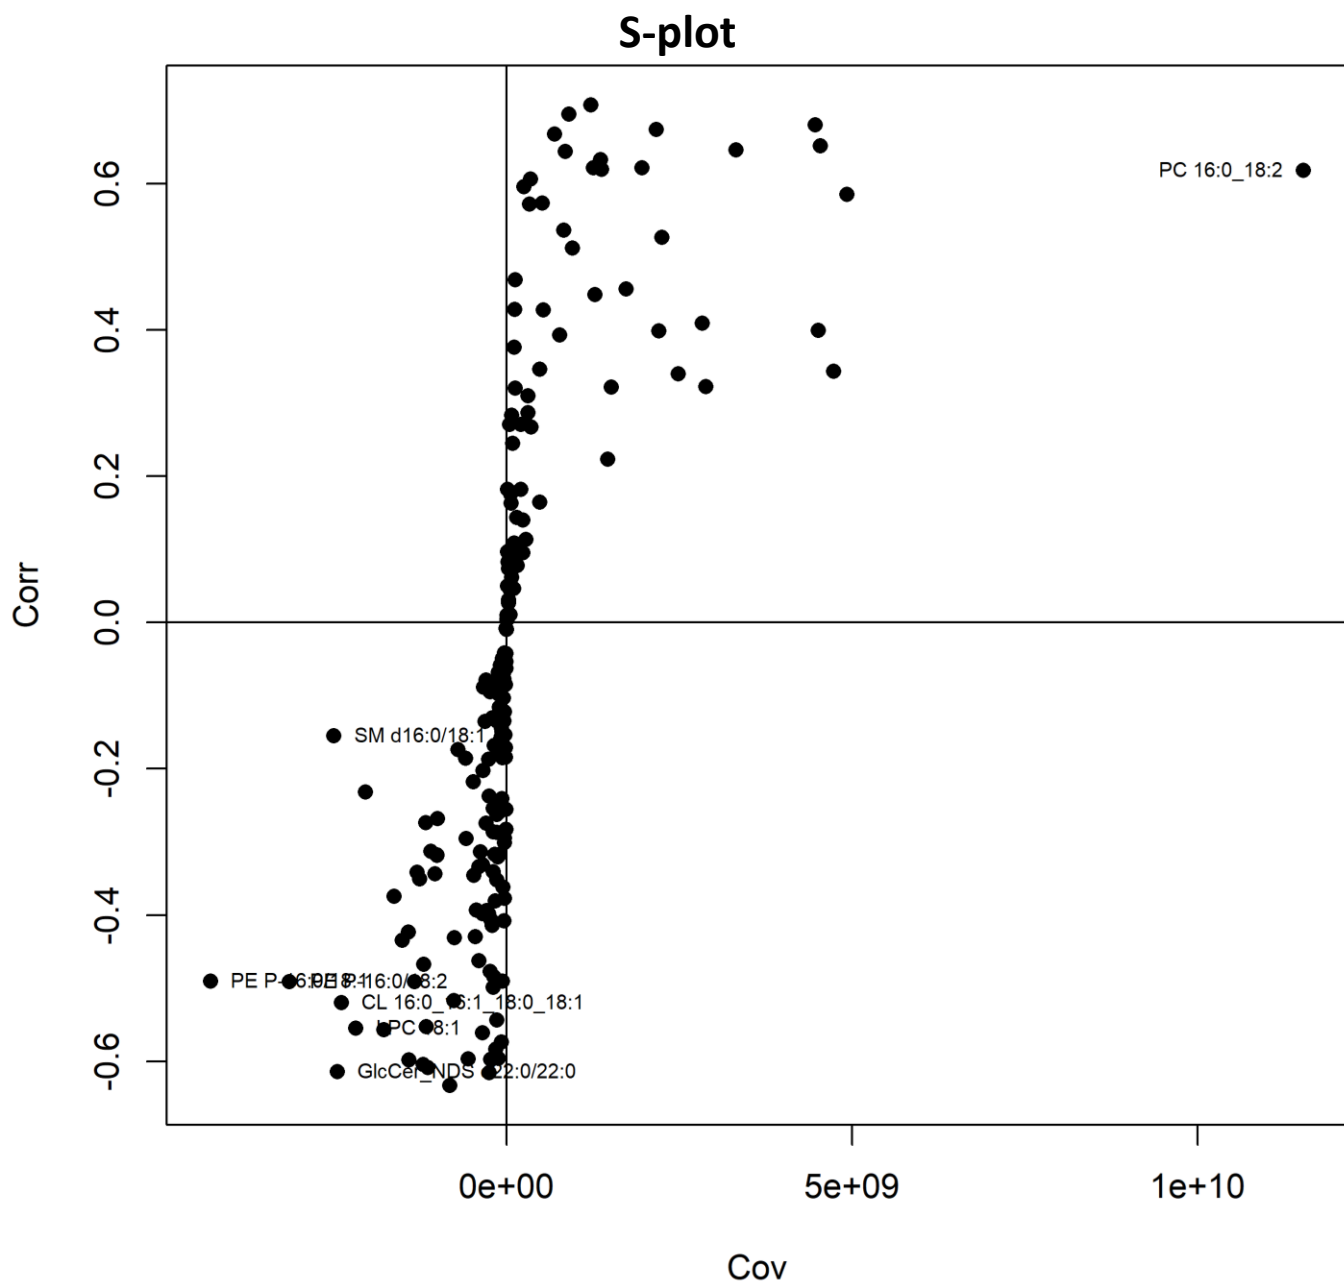

## VIP-plot

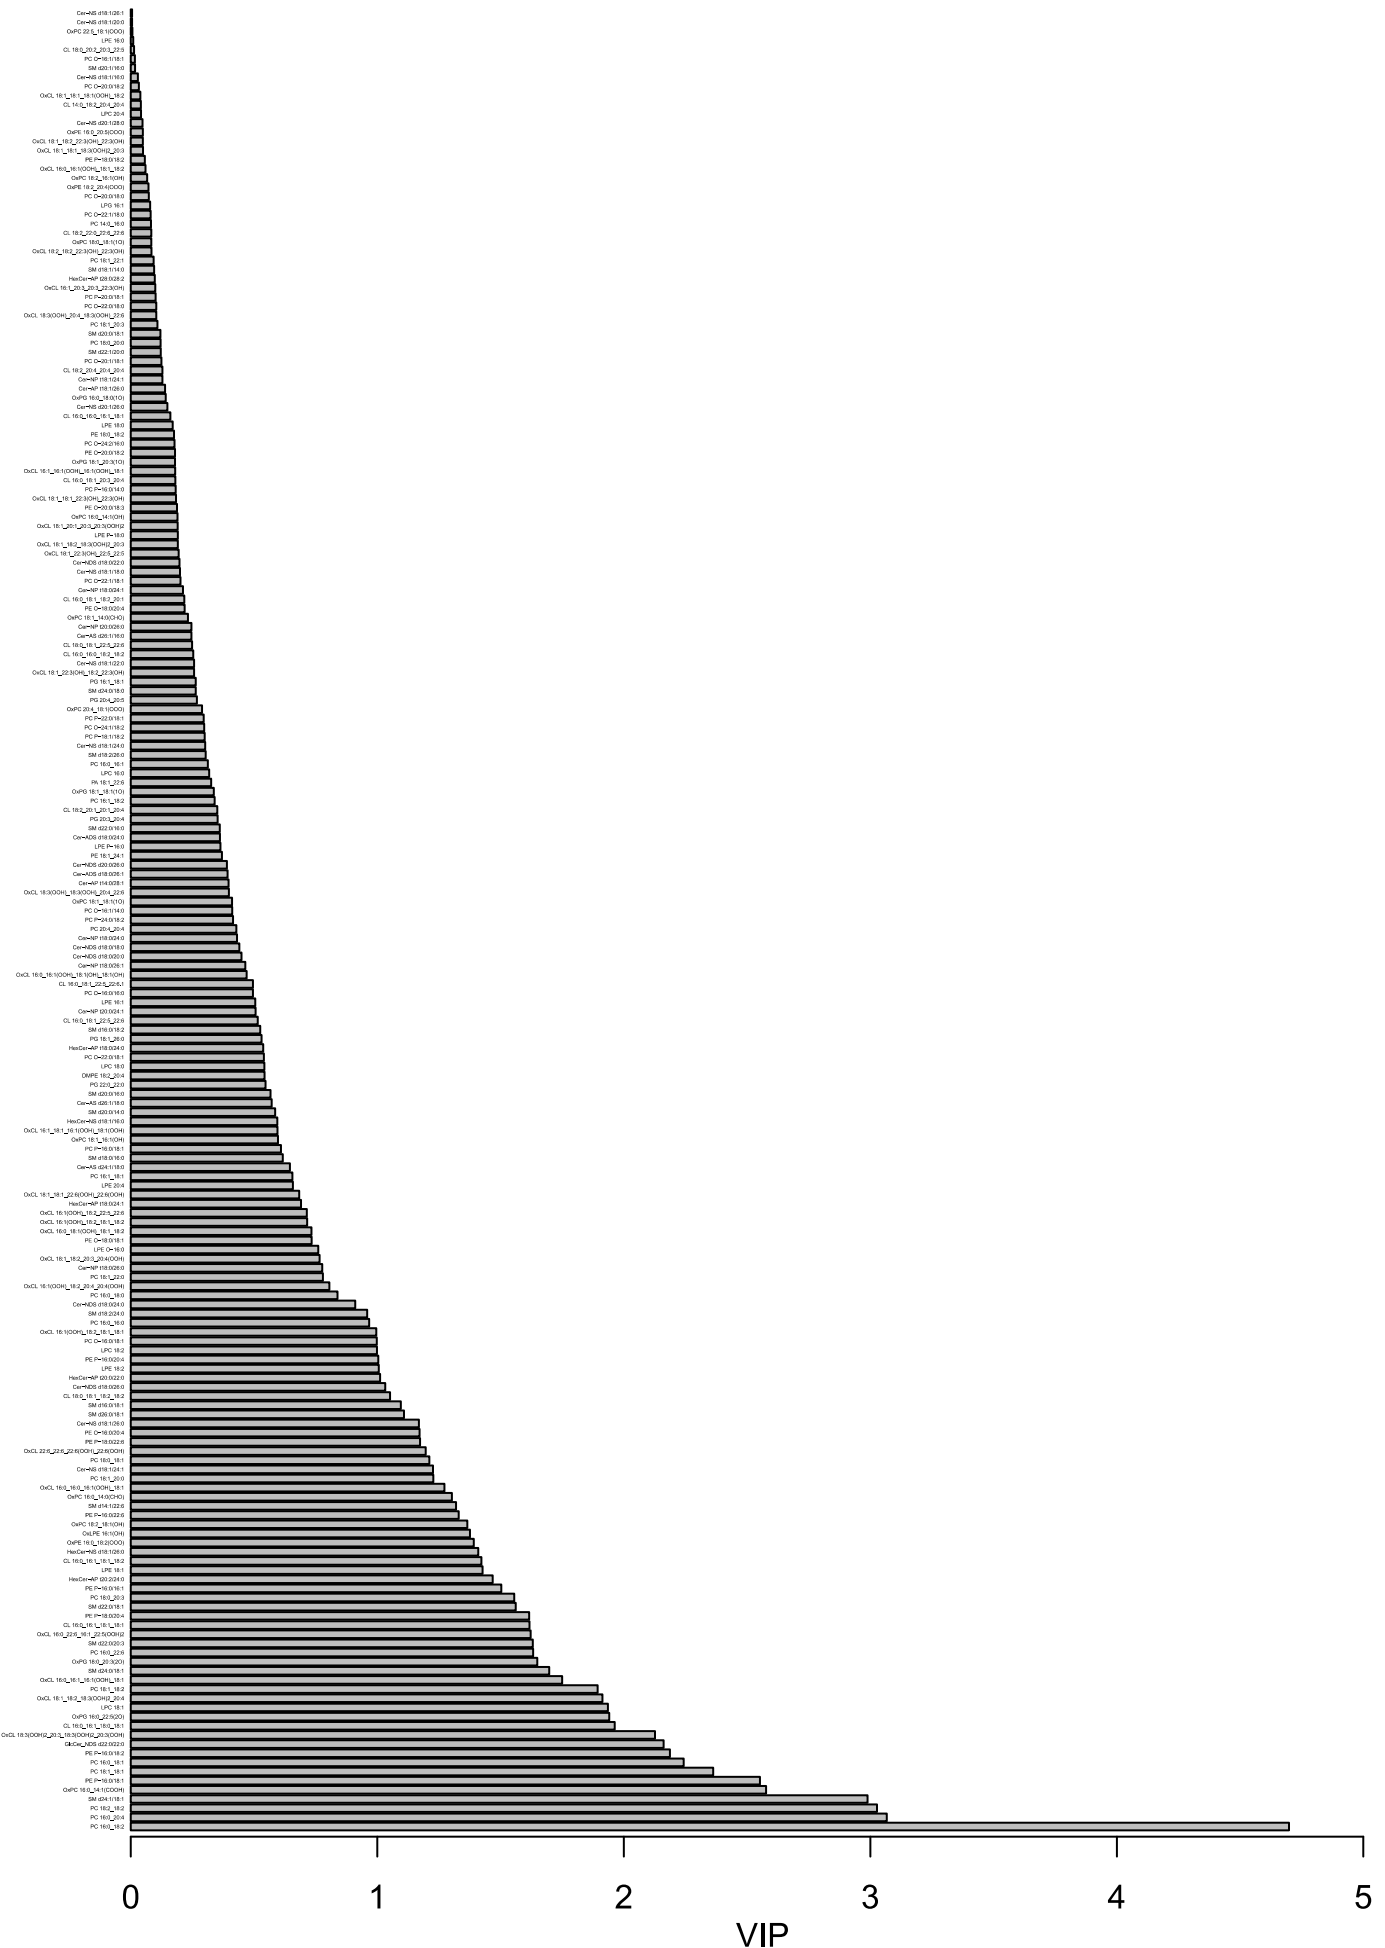

# Cervicitis vs cancer

$R^2X = 0.77$

$R^2Y = 0.38$

$Q^2Y = 0.27$

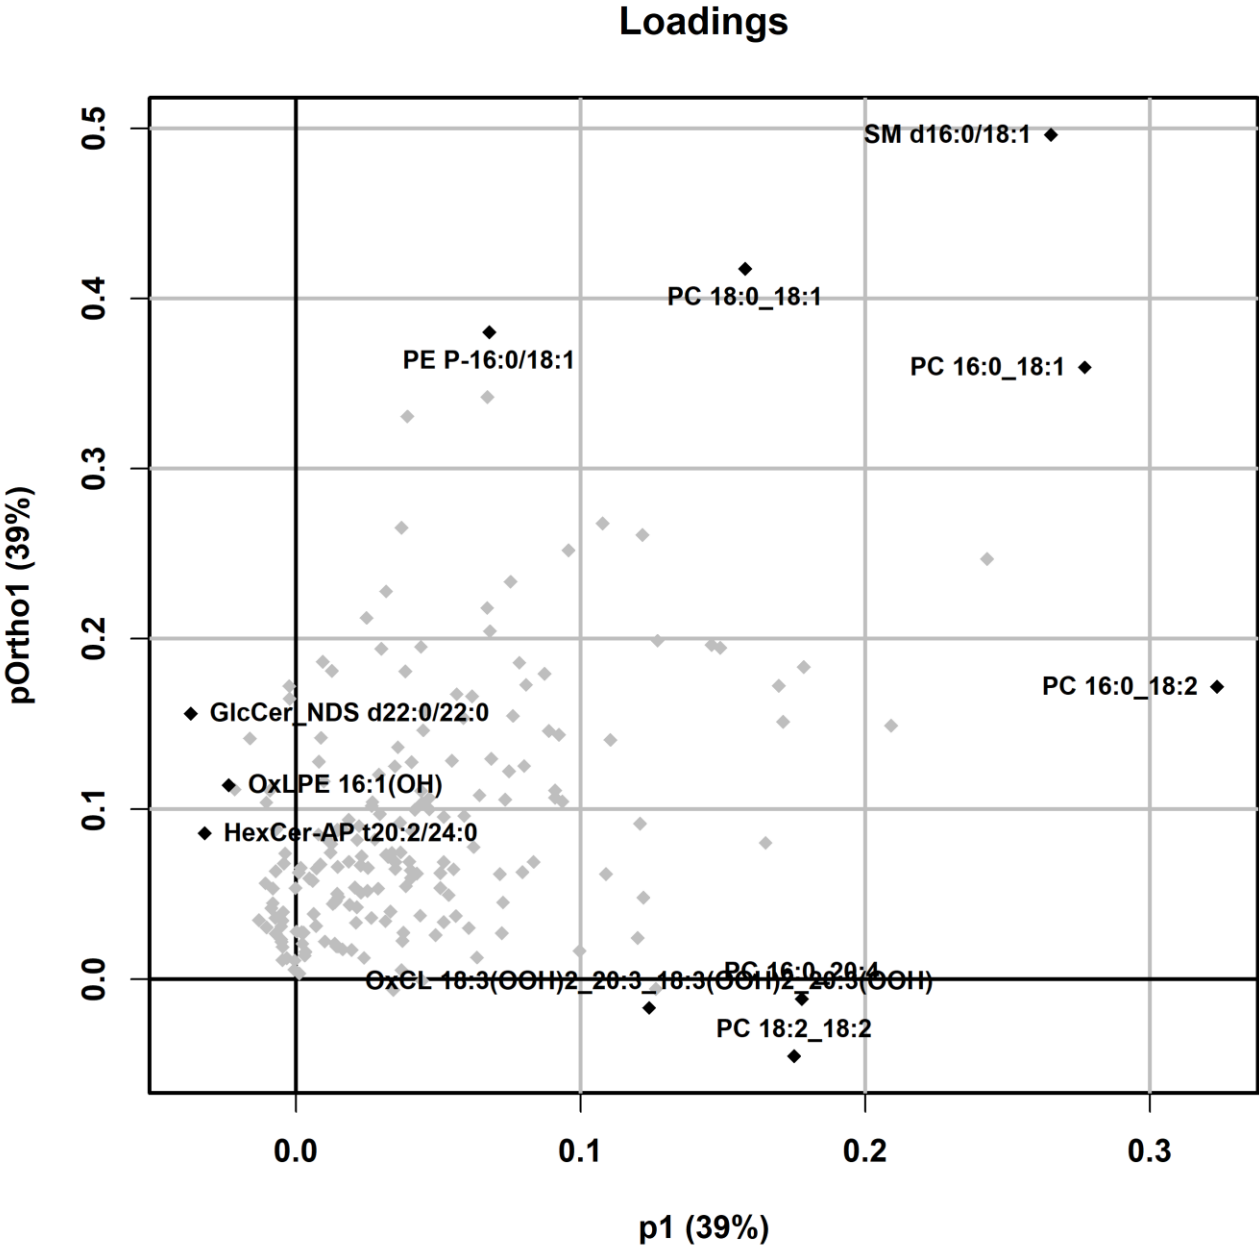

# S-plot

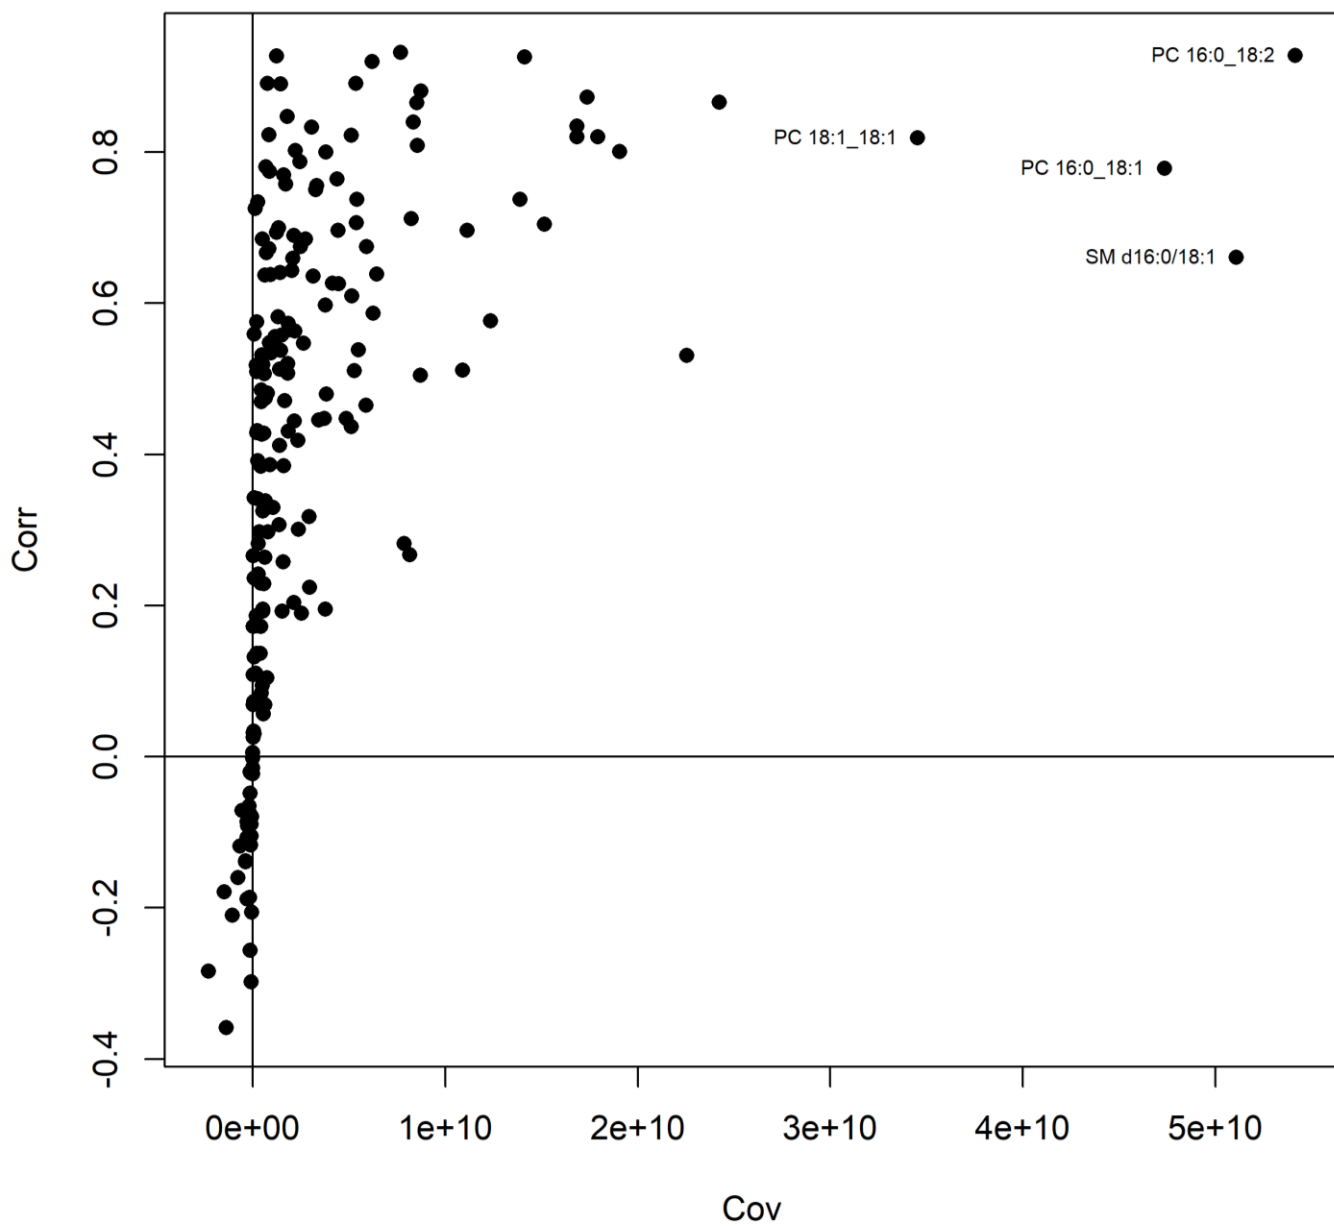

VIP-plot

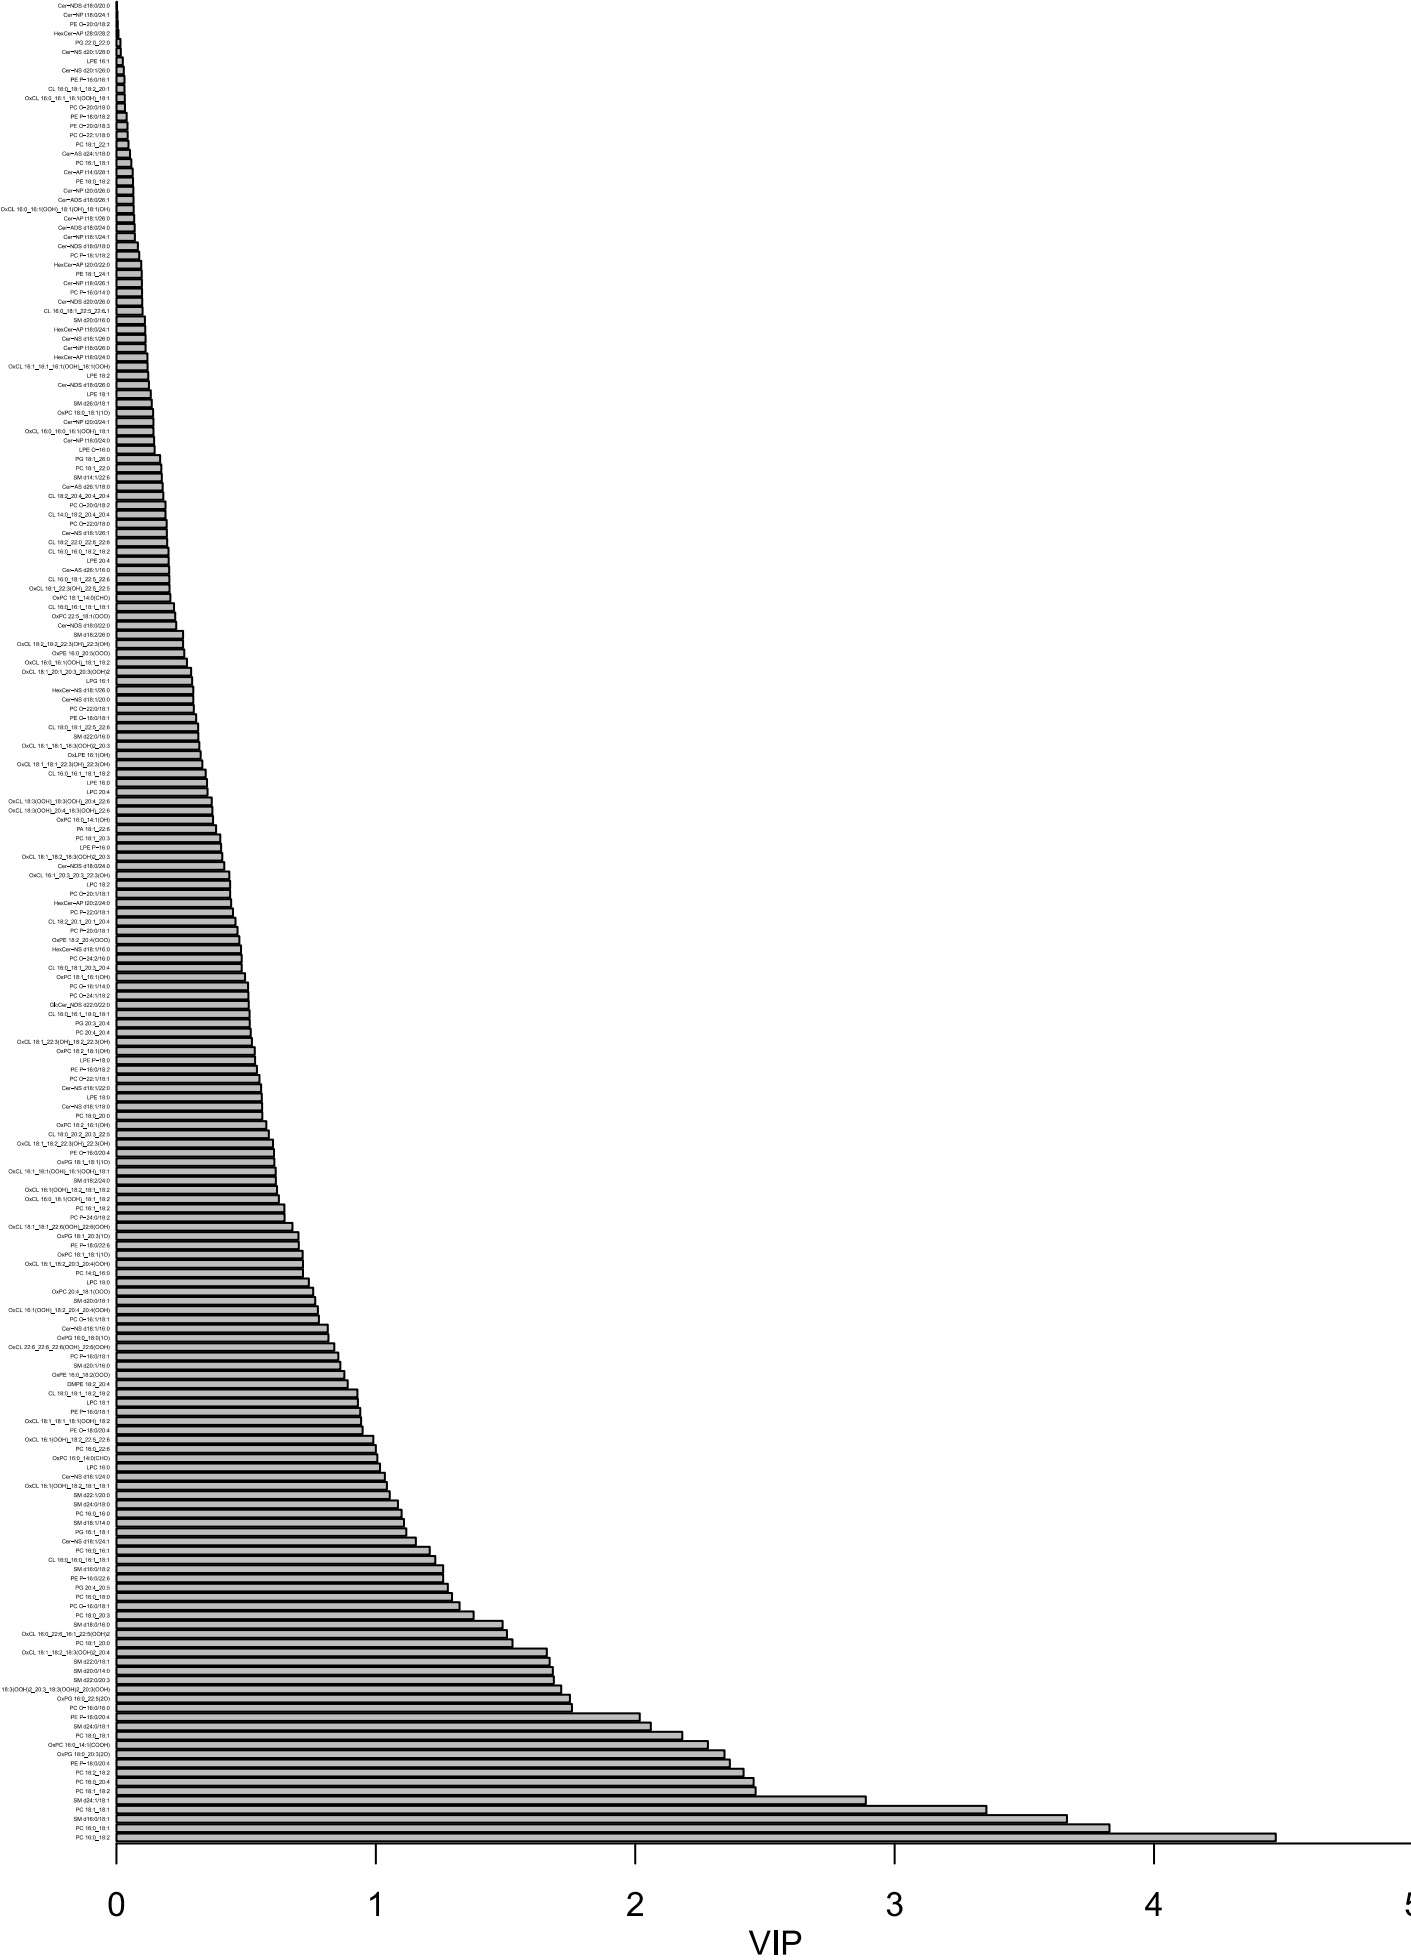

# LSIL vs HSIL

$R^2X = 0.76$

$R^2Y = 0.18$

$Q^2Y = 0.08$

Loadings

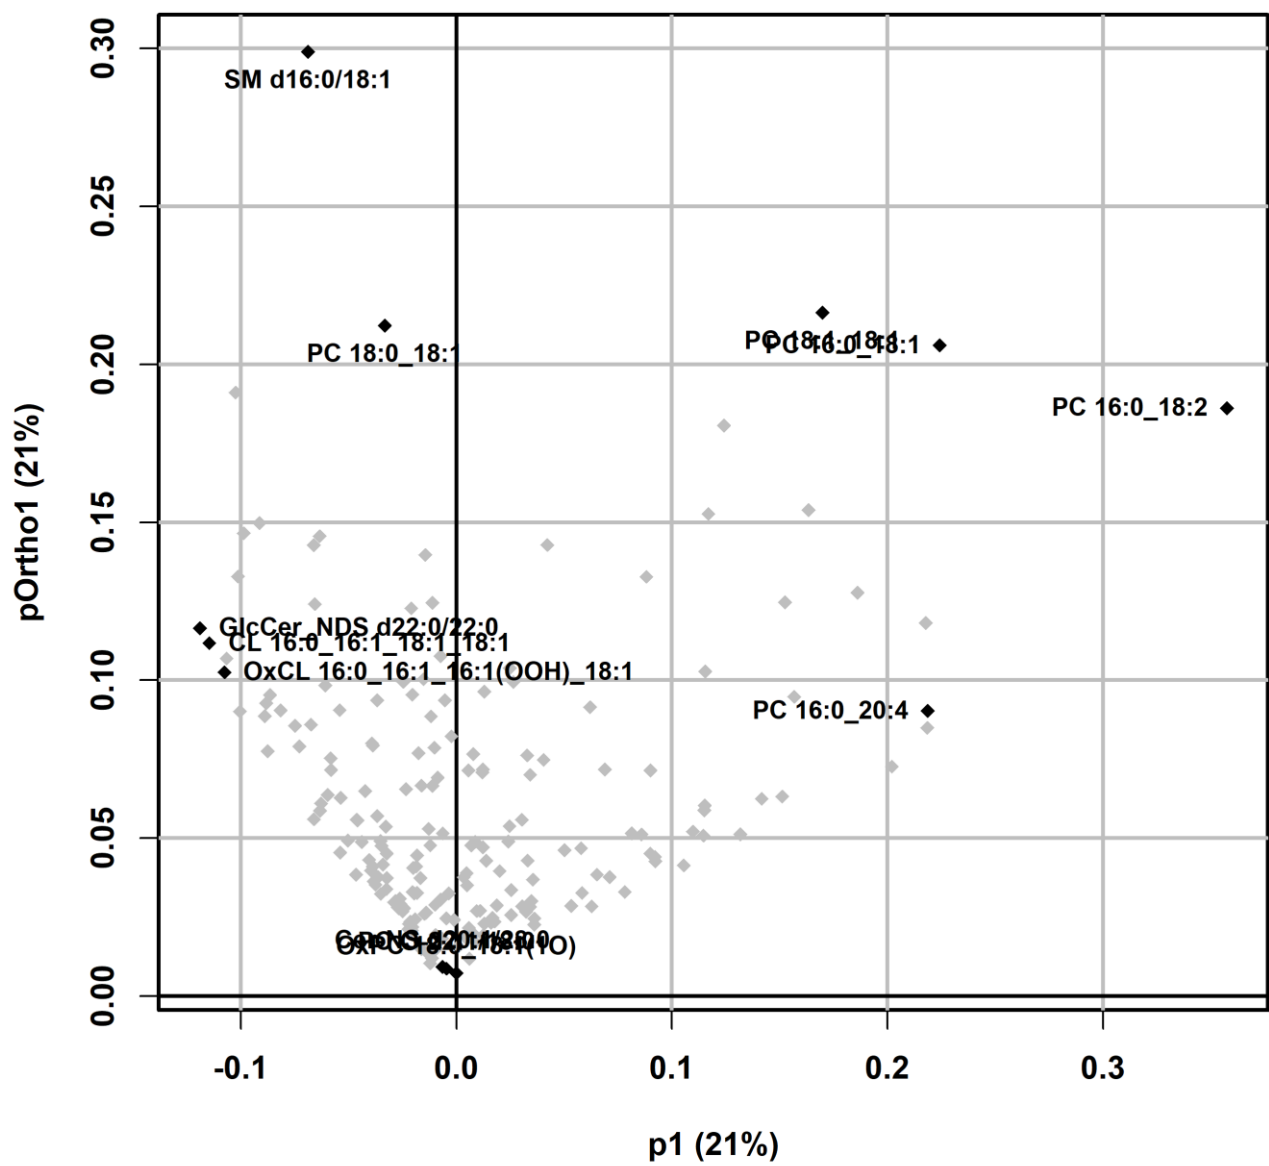

S-plot

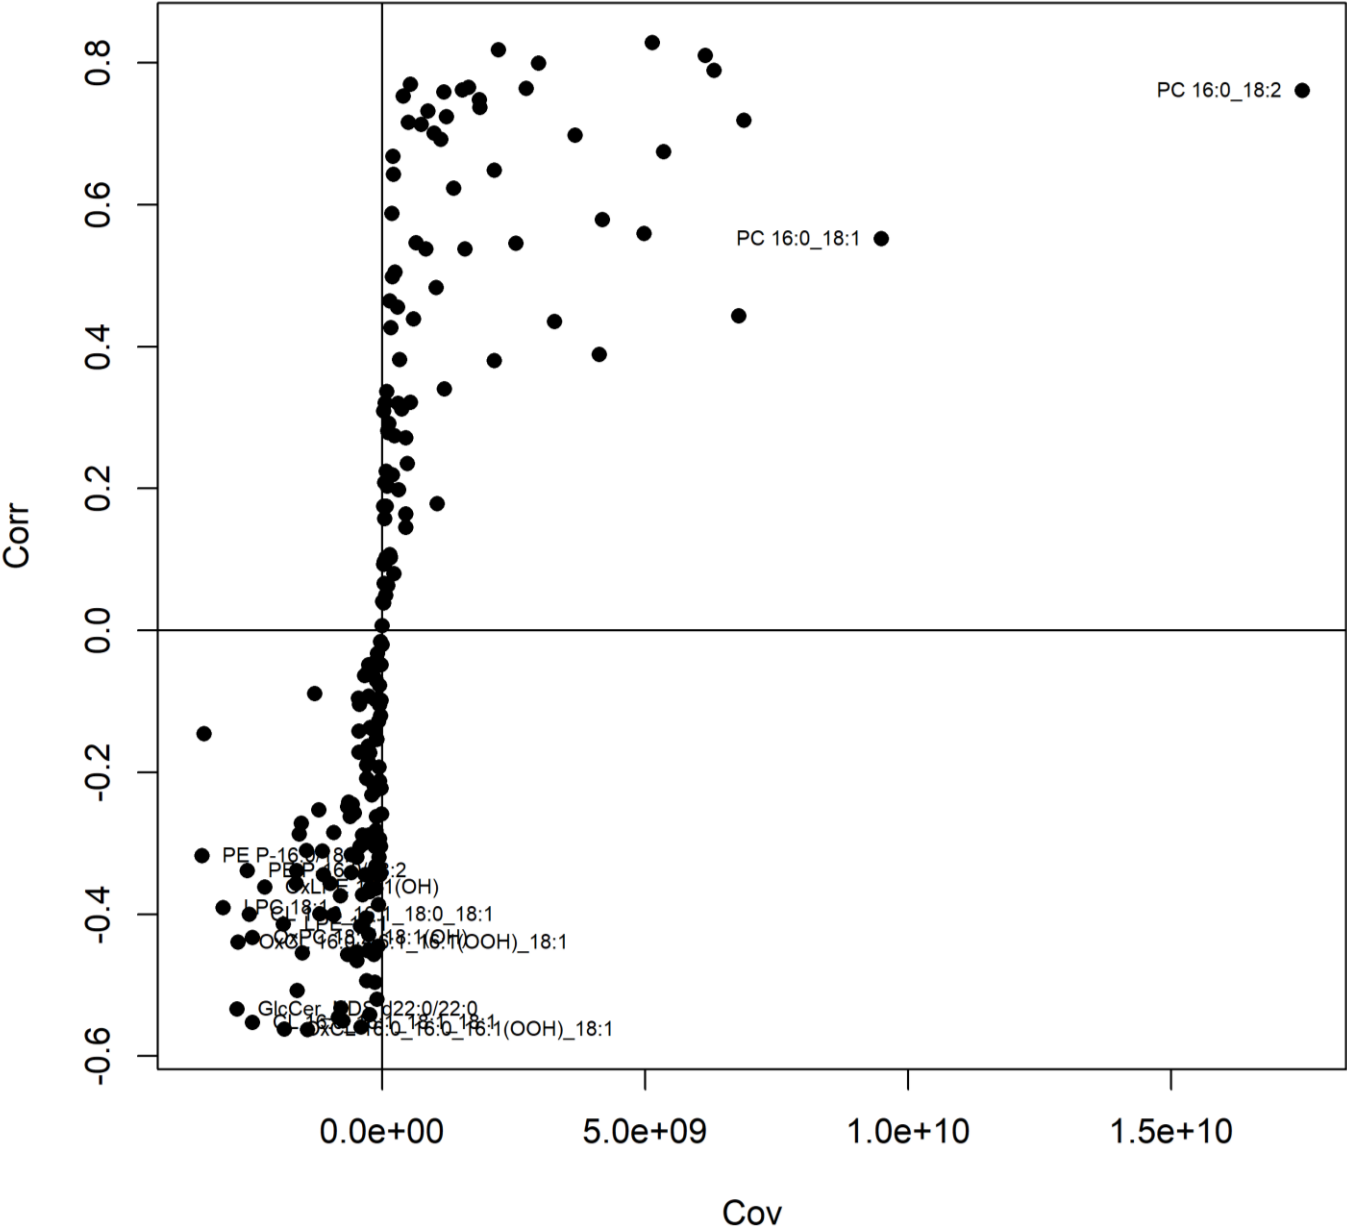

VIP-plot

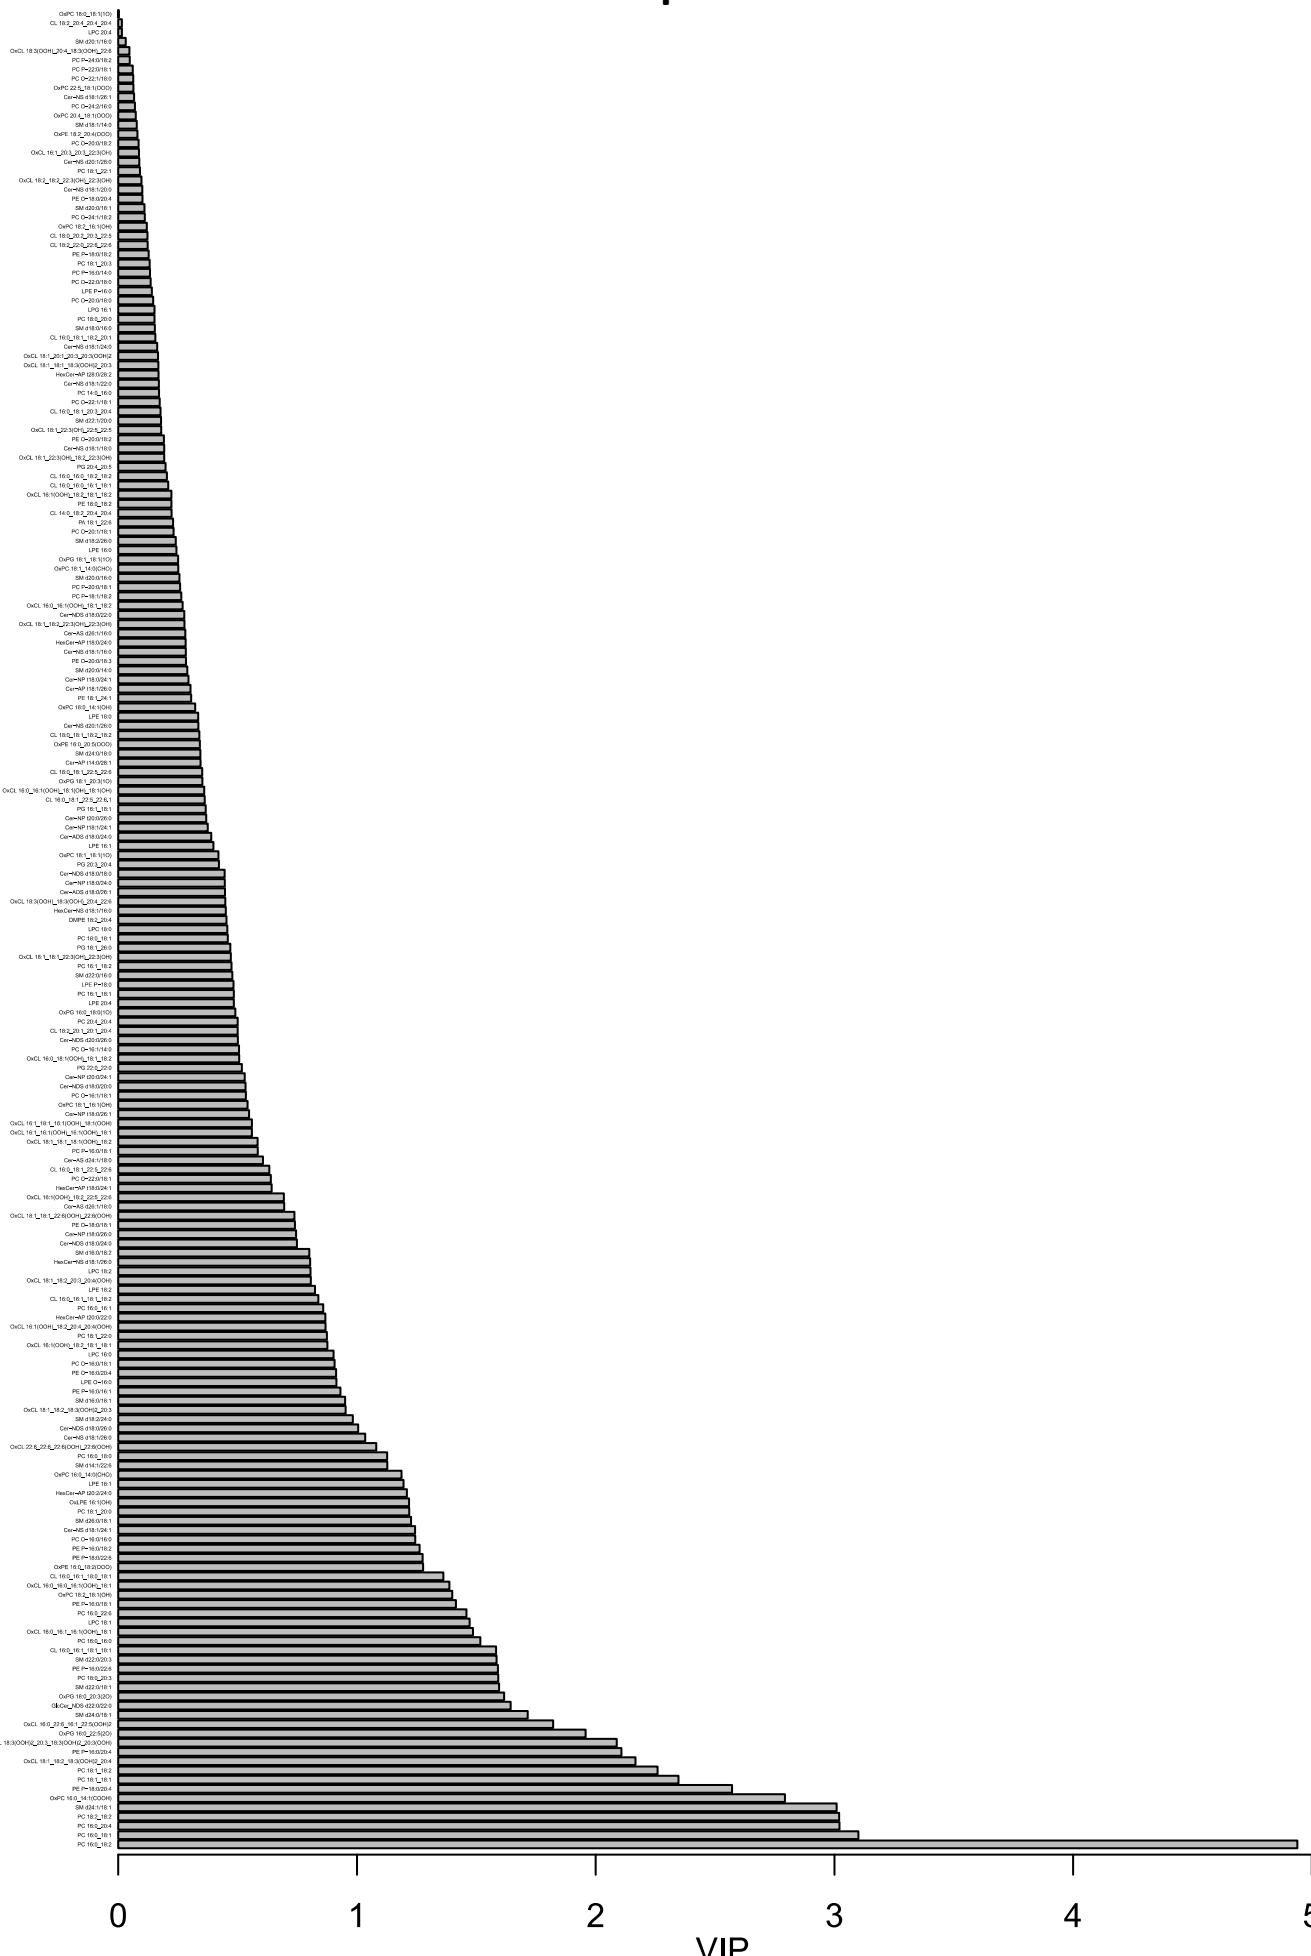



# LSIL vs cancer

$R^2X = 0.77$

$R^2Y = 0.42$

$Q^2Y = 0.34$

Loadings

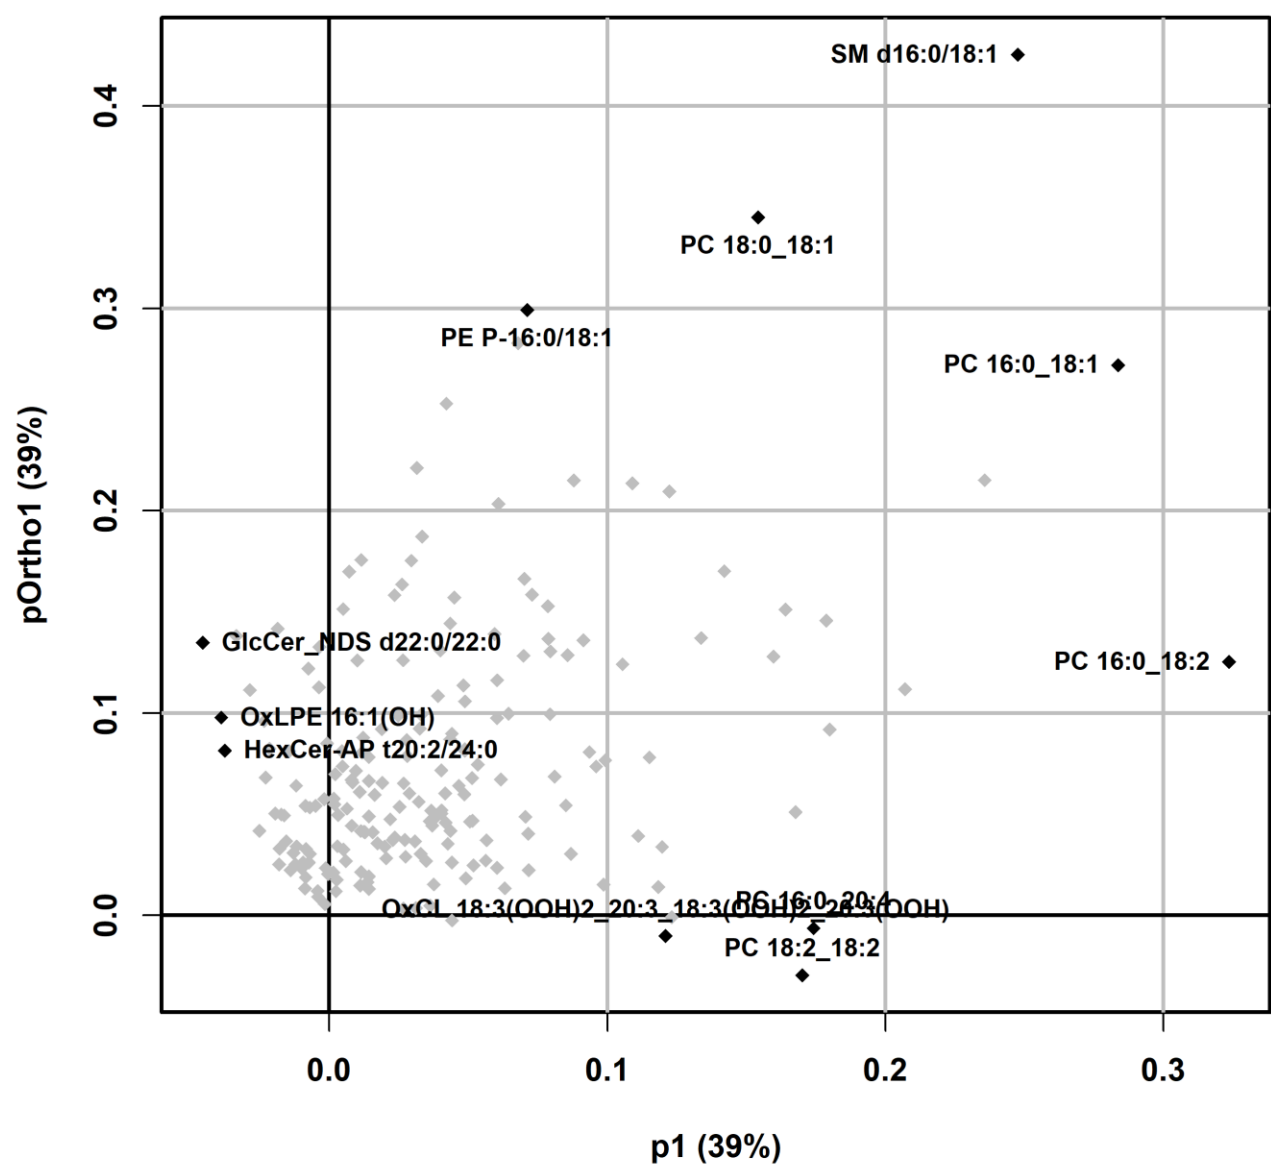

S-plot

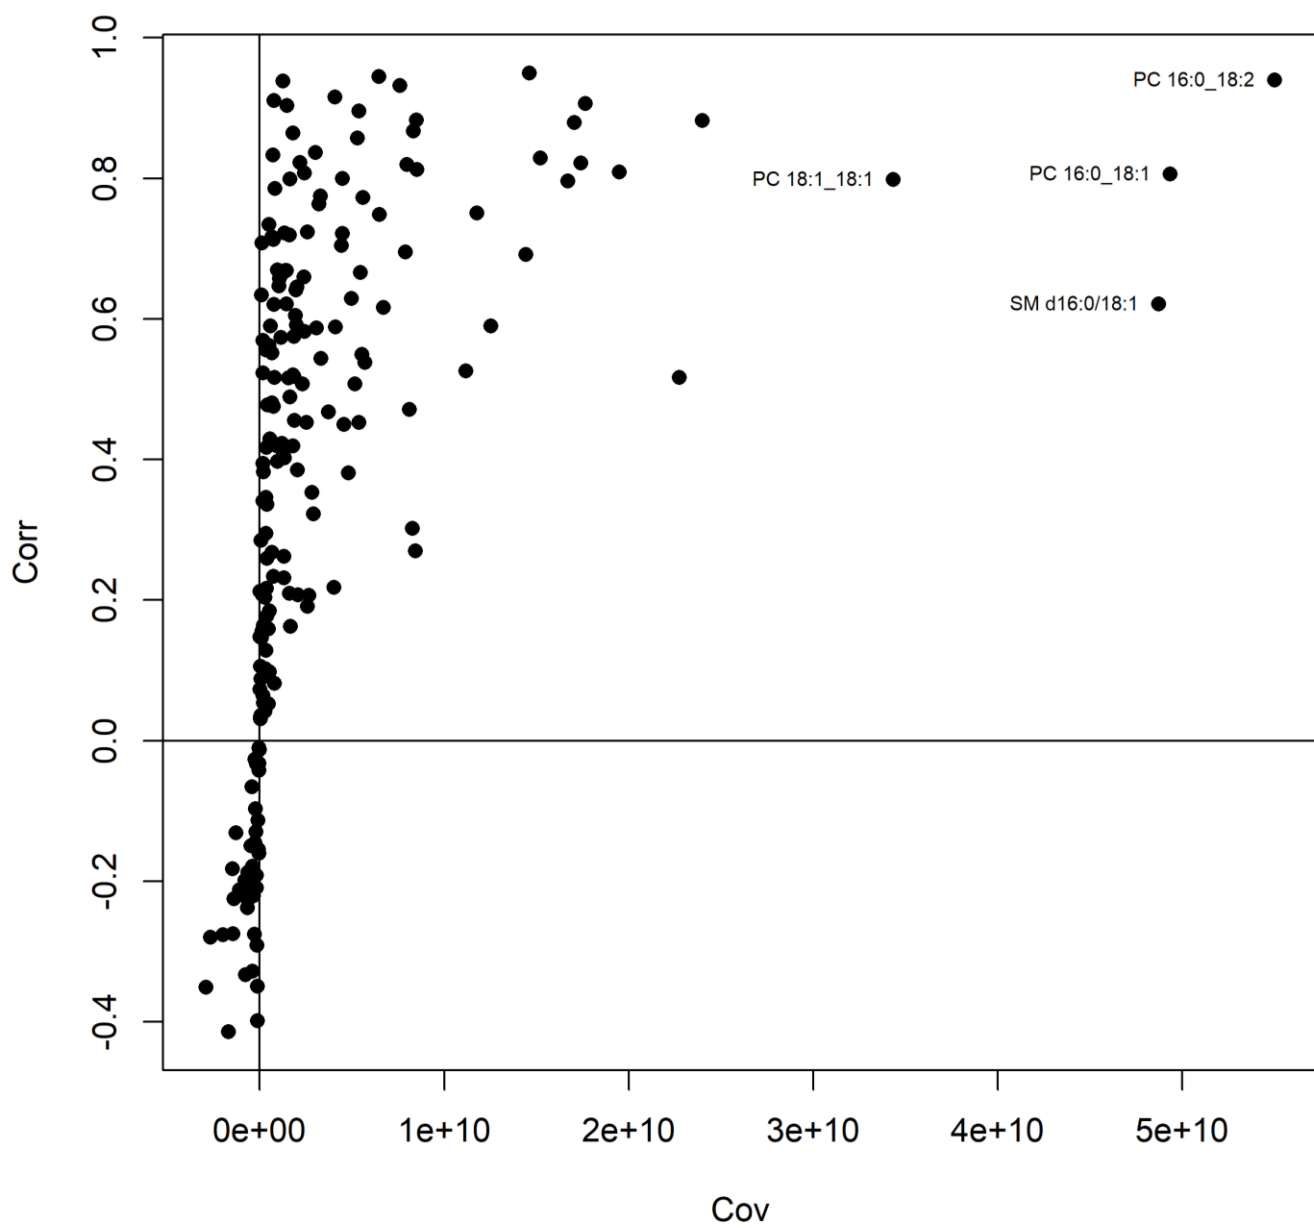

## VIP-plot

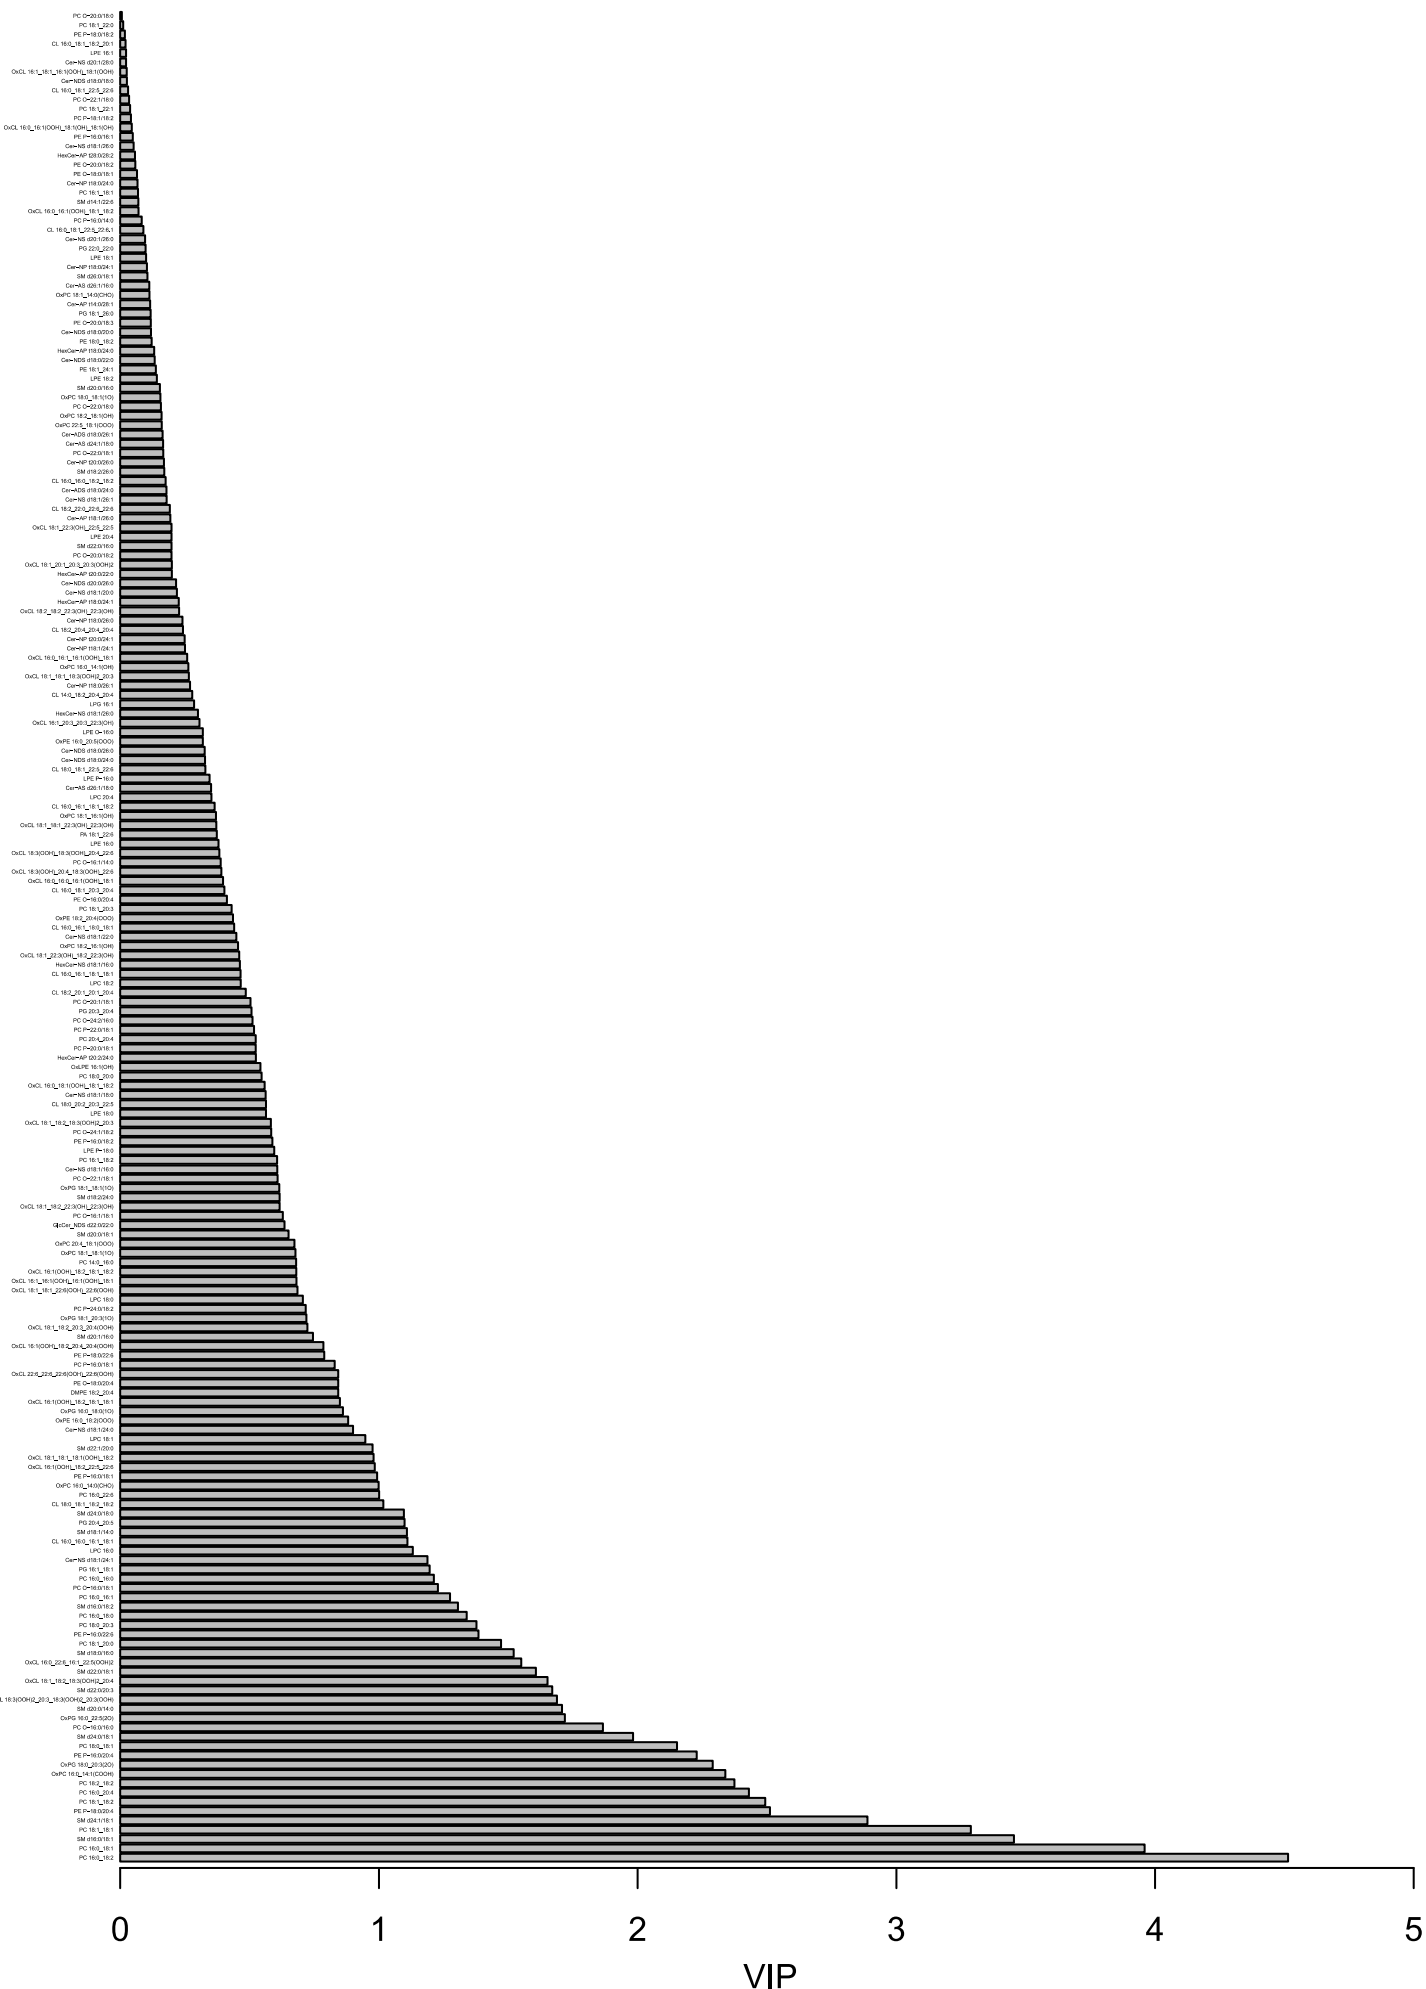

# HSIL vs cancer

$R^2X = 0.68$

$R^2Y = 0.48$

$Q^2Y = -0.05$

Loadings

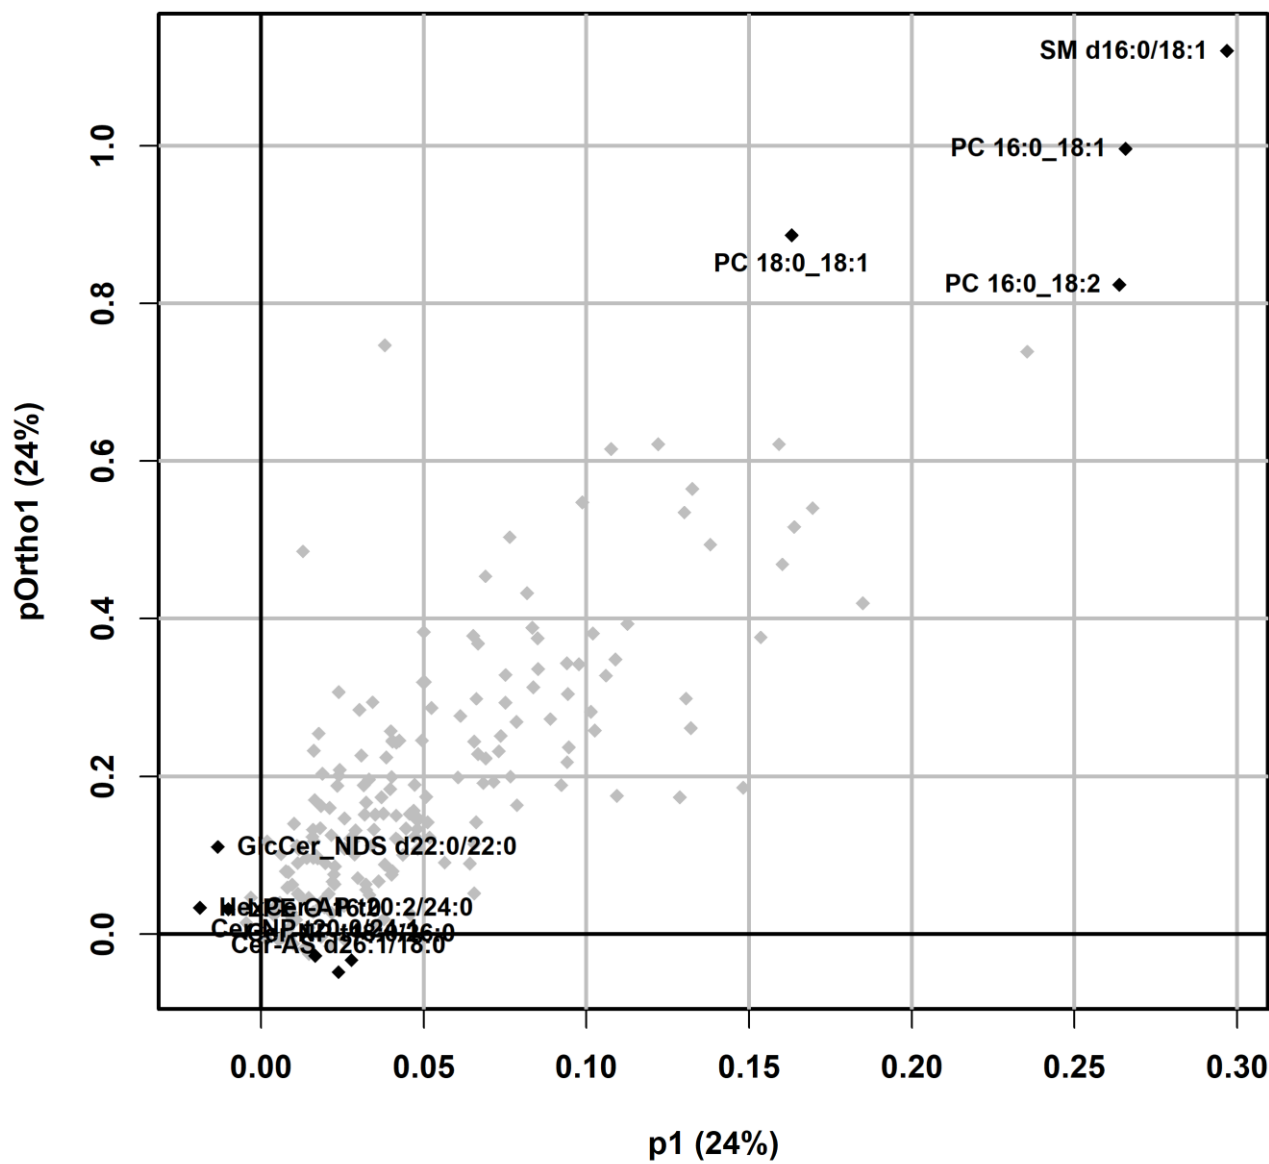

S-plot

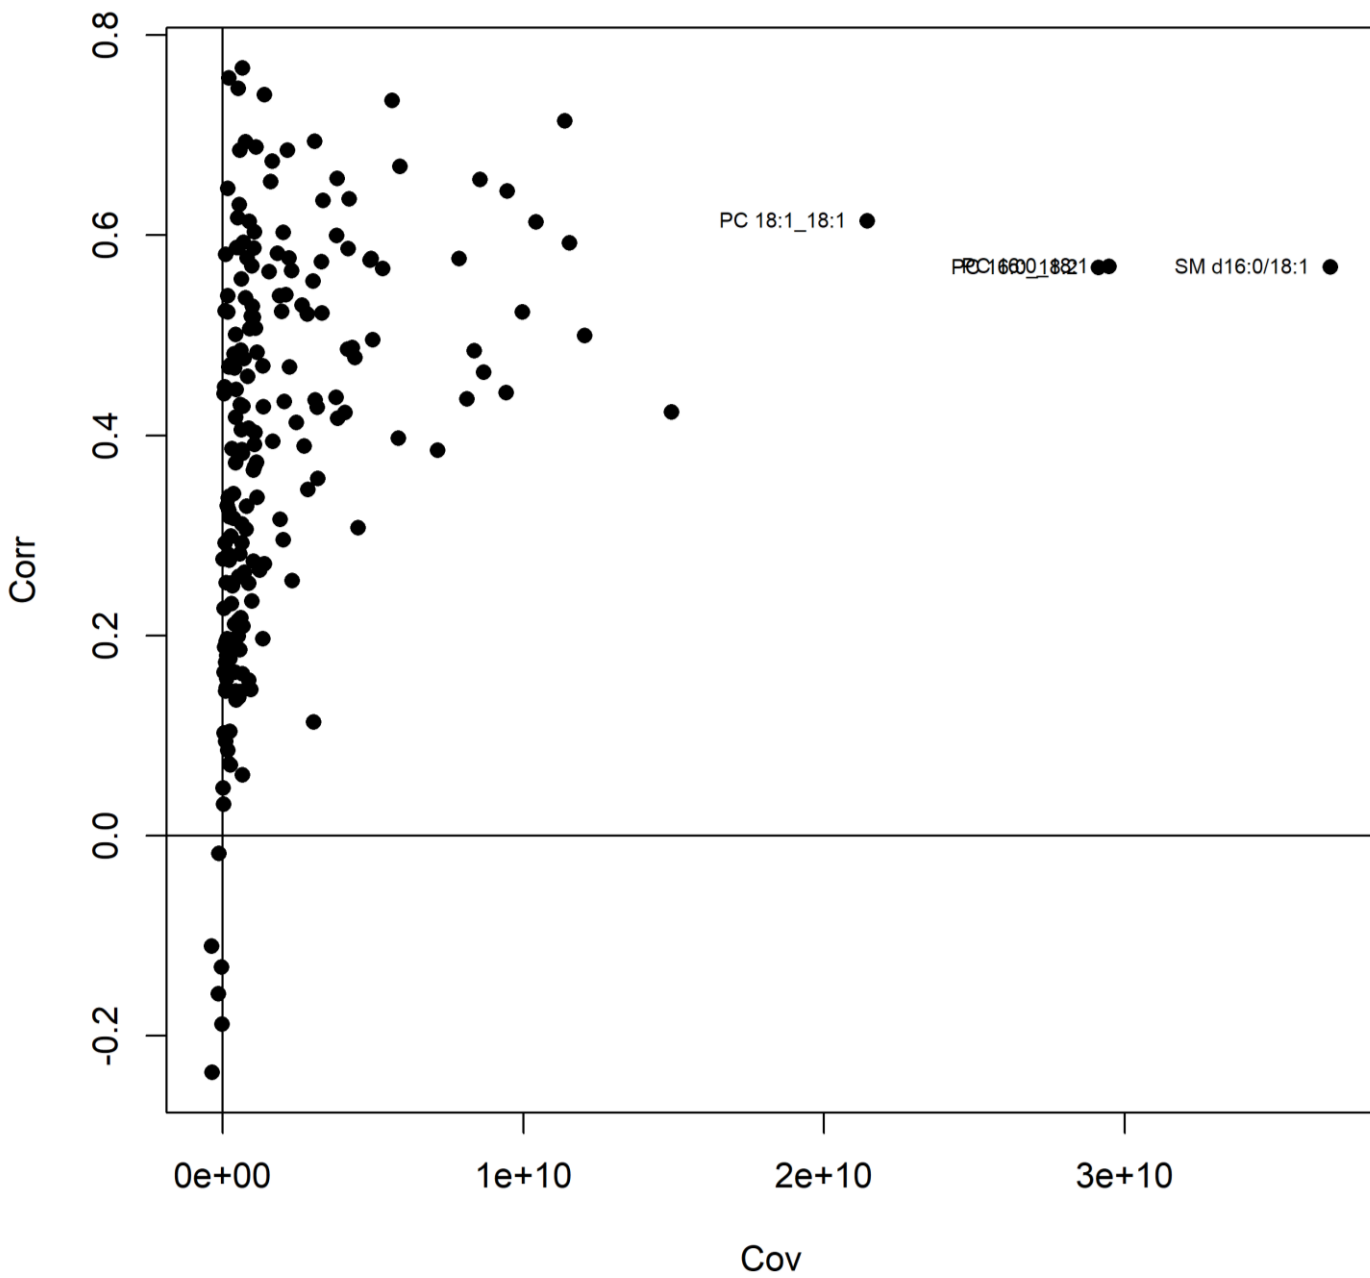

# VIP-plot

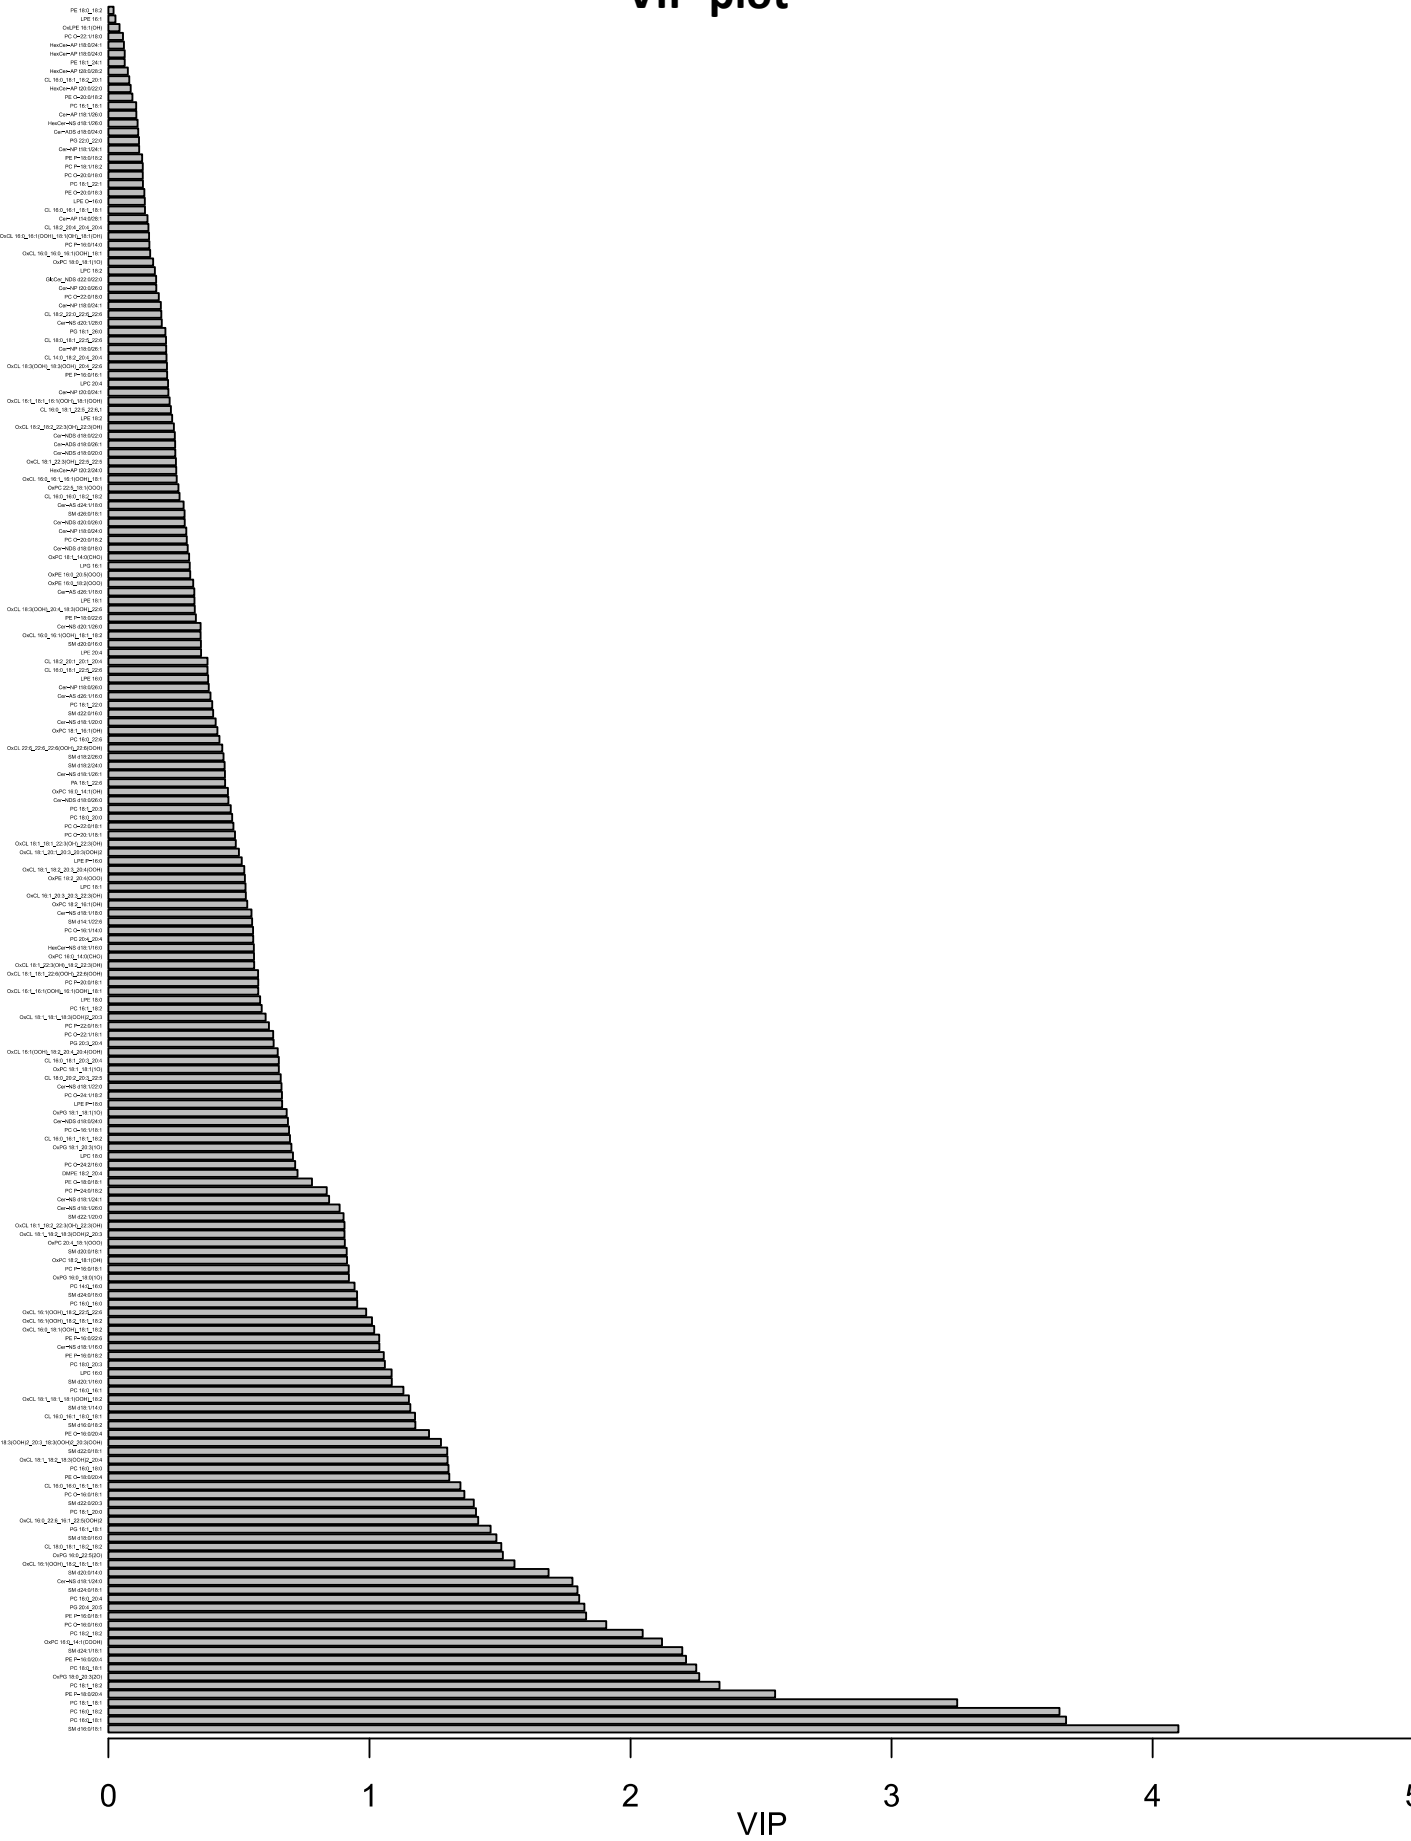

Supplement: s1 [file s1]
