# Supplementary figures and images for: Non-Invasive Differential Diagnosis of Cervical Neoplastic Lesions by the Lipid Profile Analysis of Cervical Scrapings
Source: MDPI journal article supplement (doi:10.3390/metabo12090883), 2022-09-19

# Positive ion mode lipid markers MS/MS

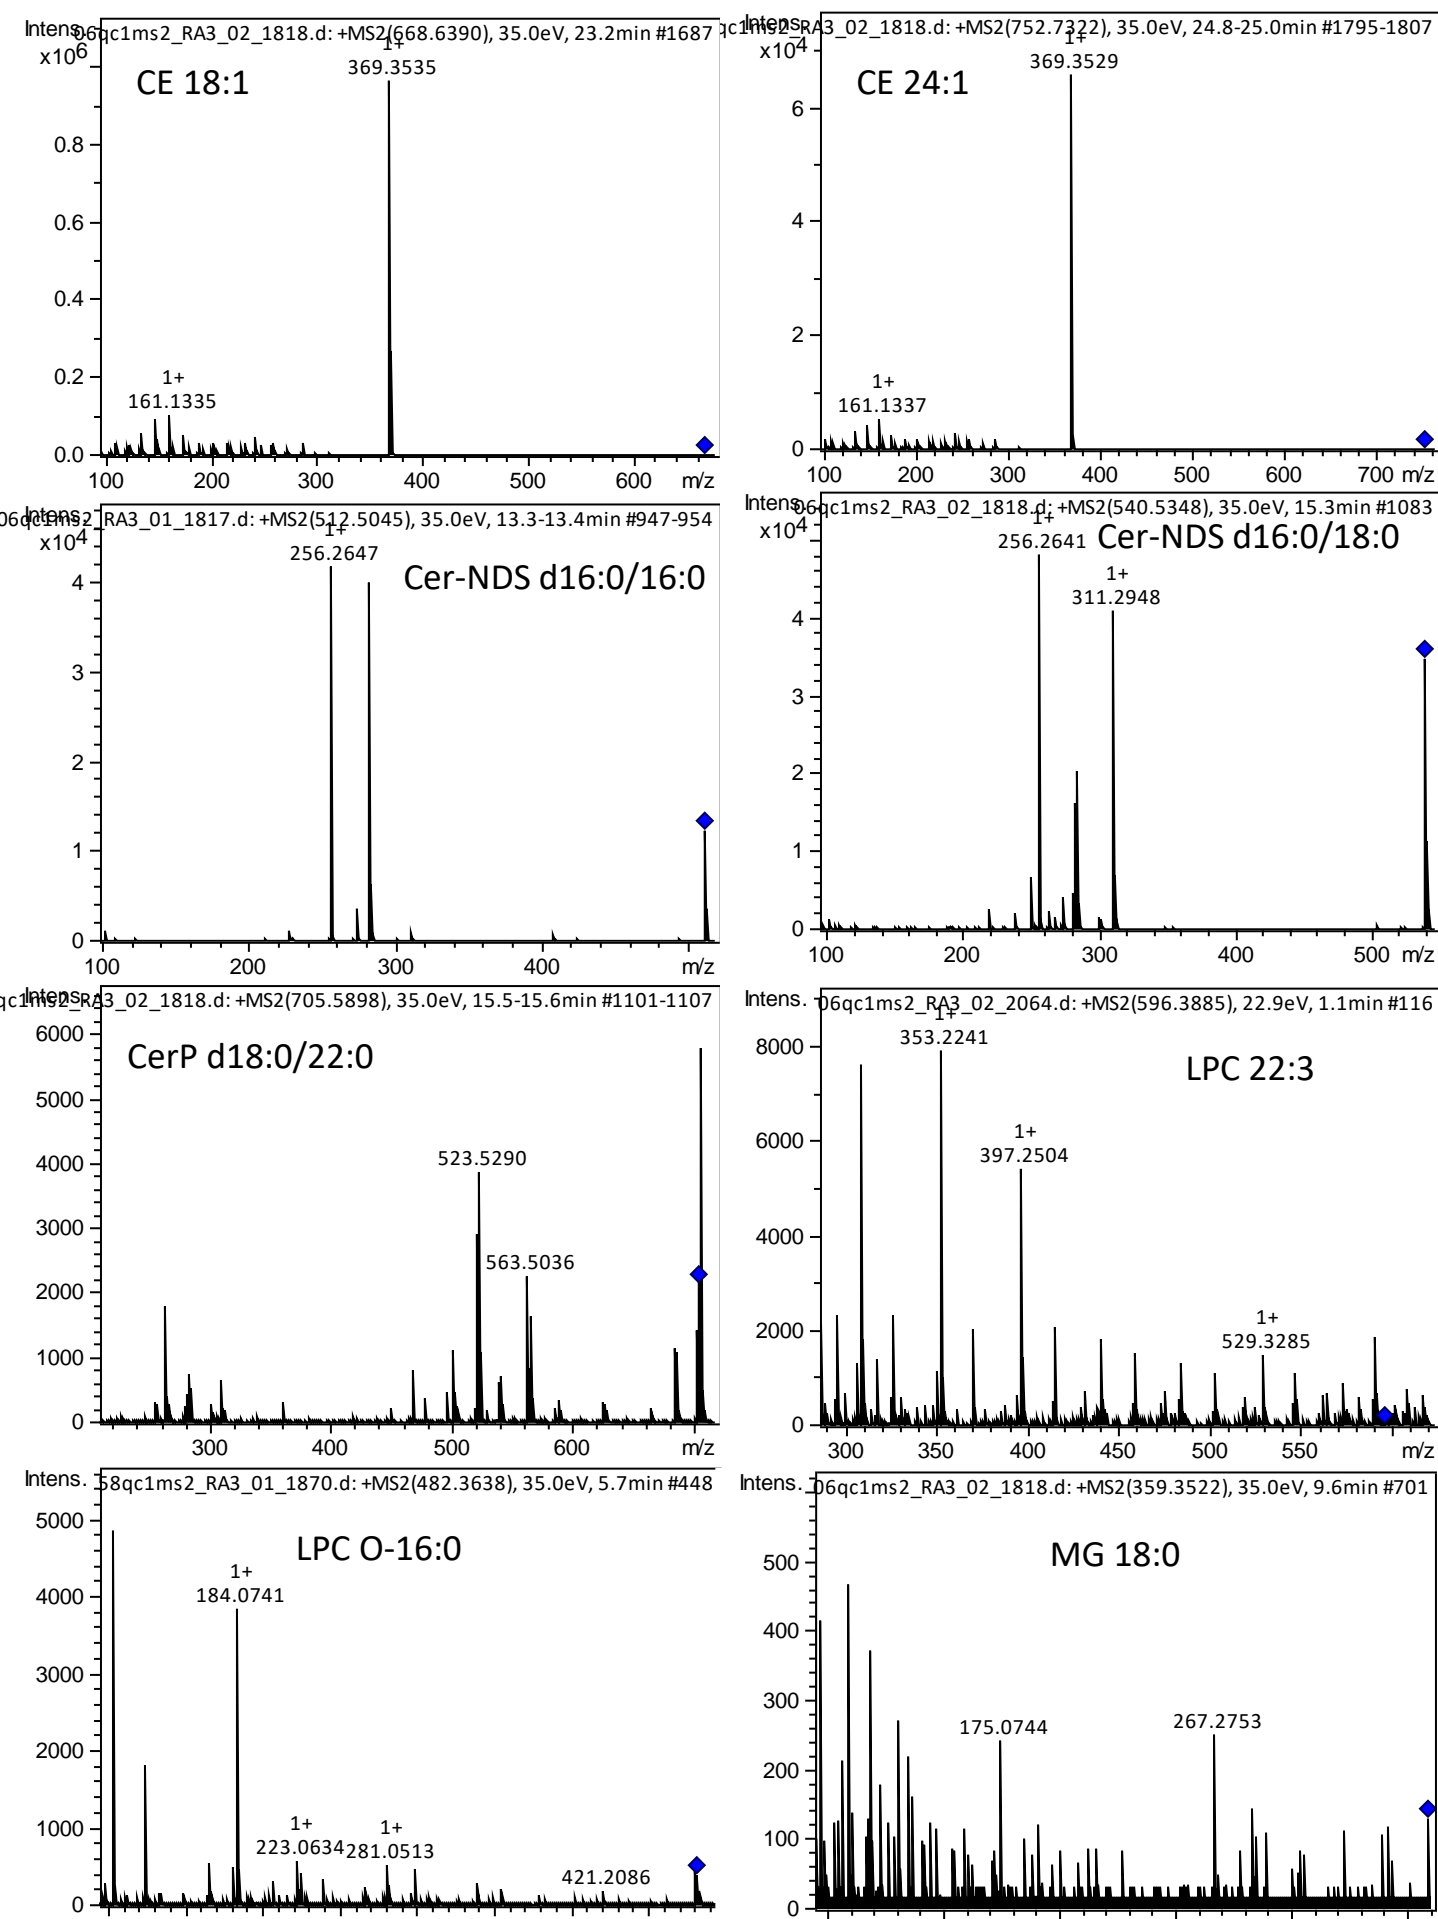

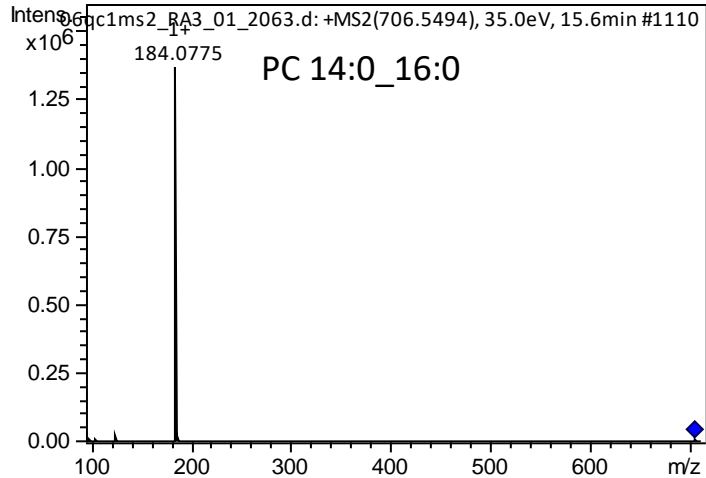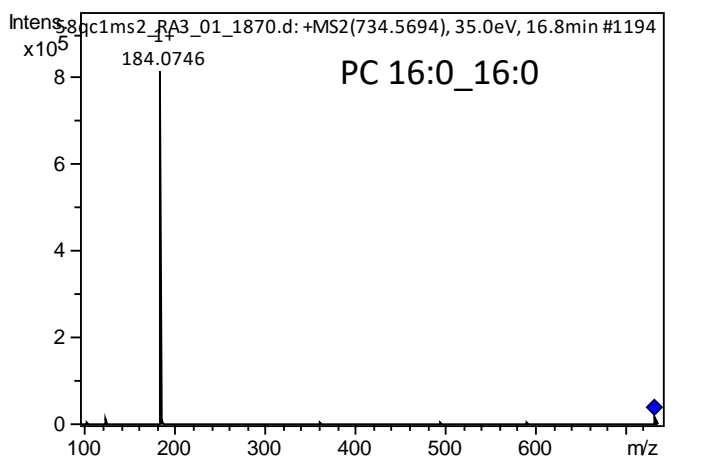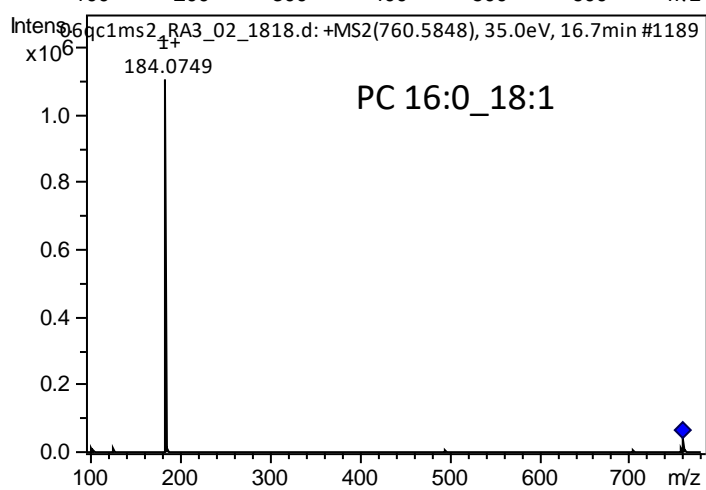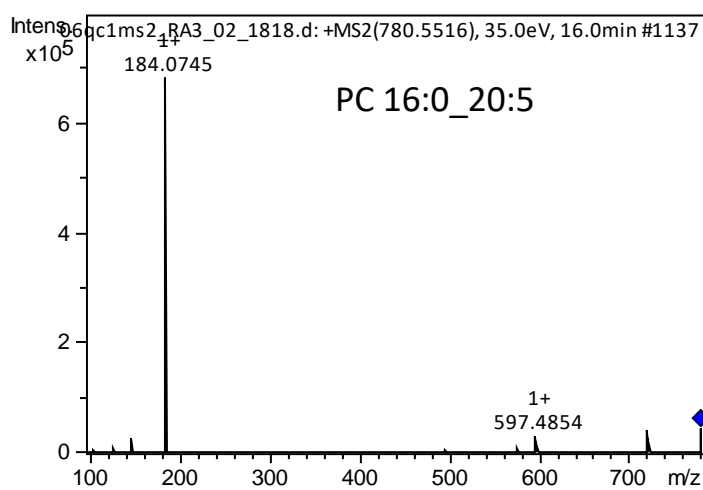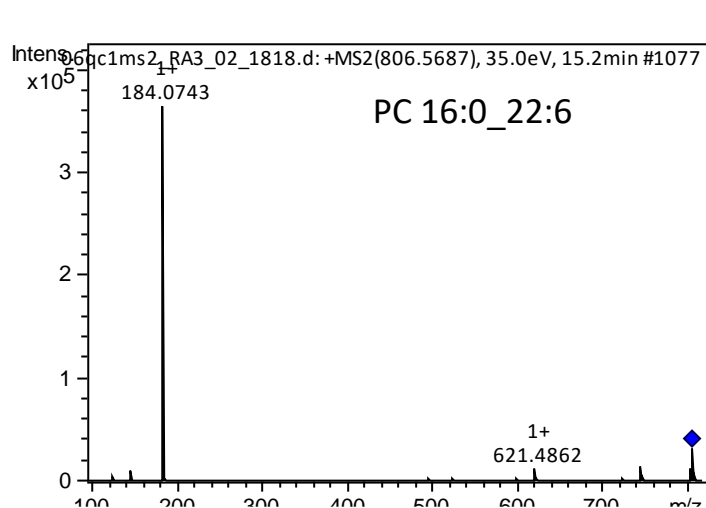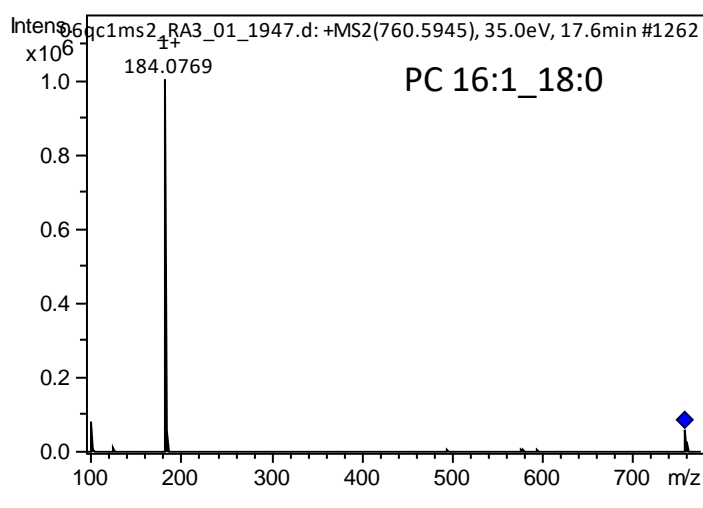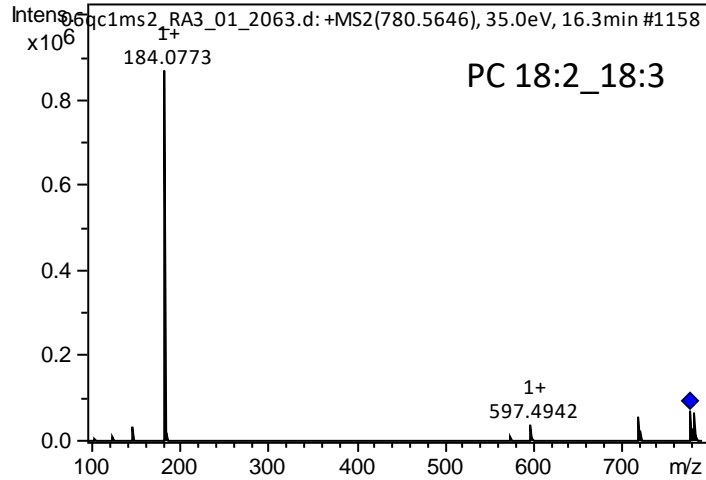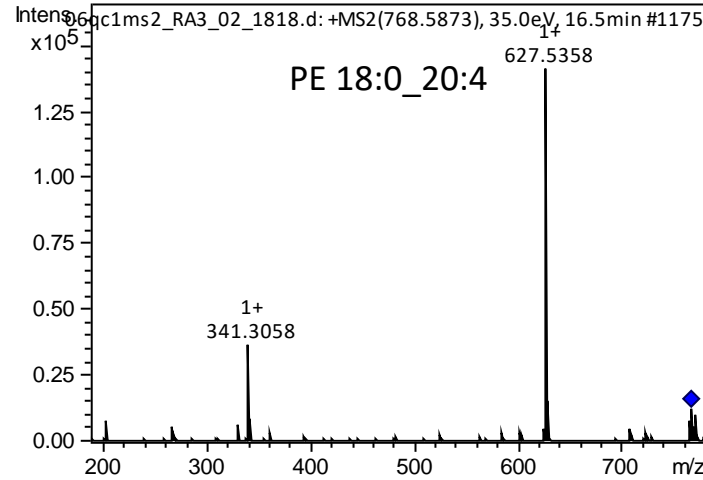

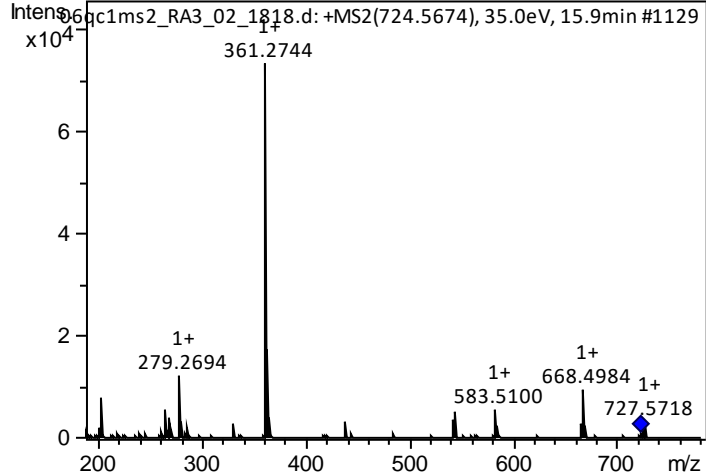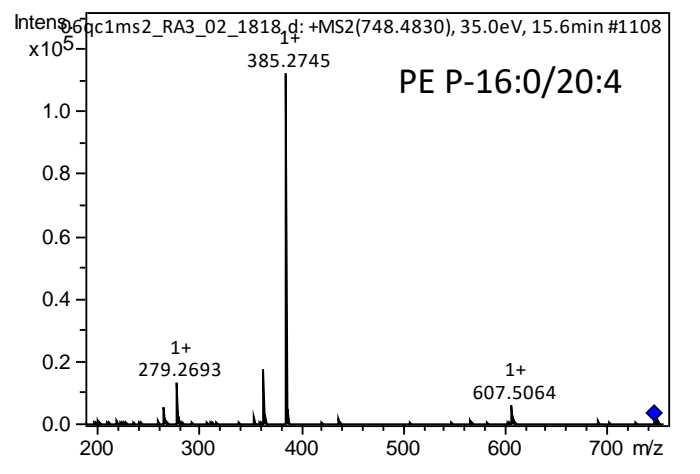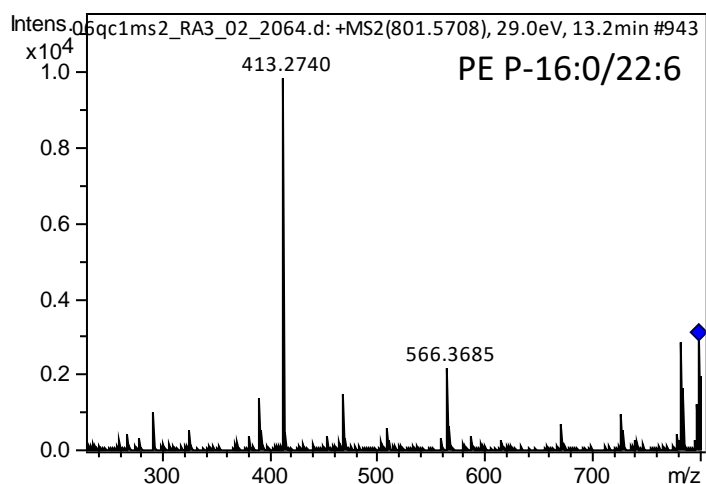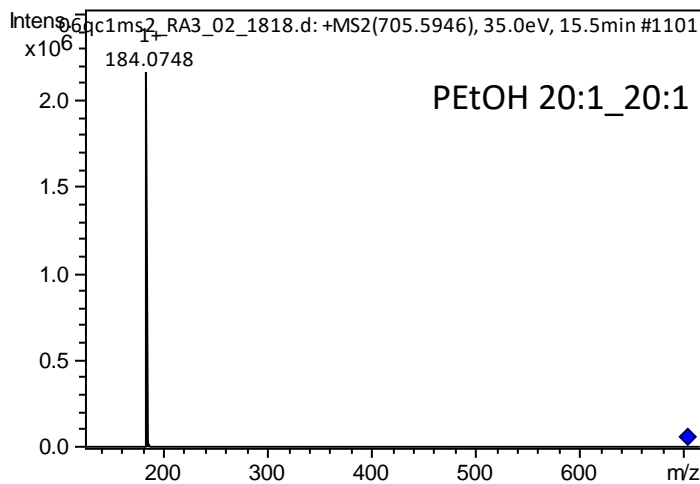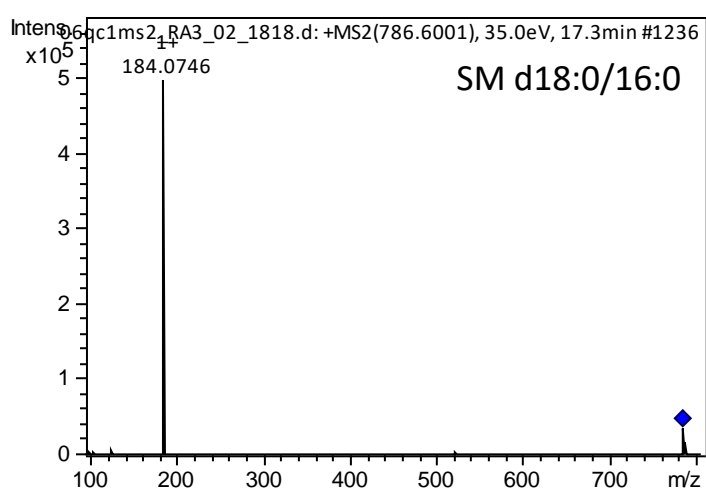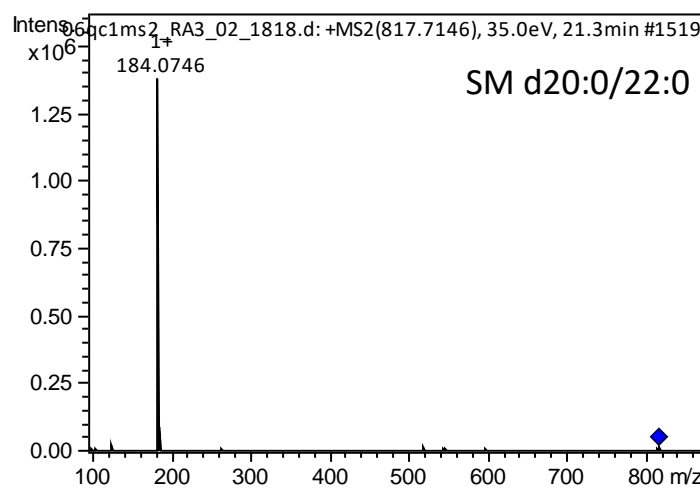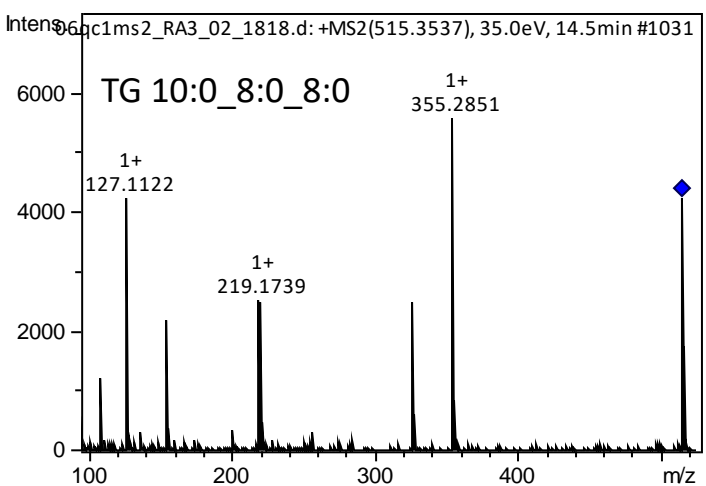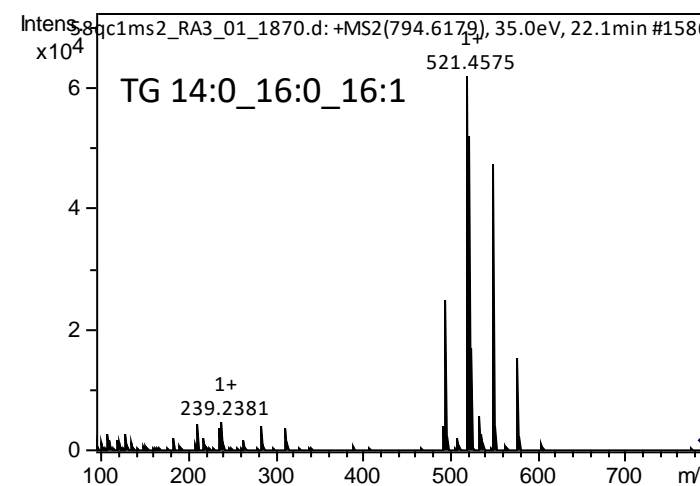

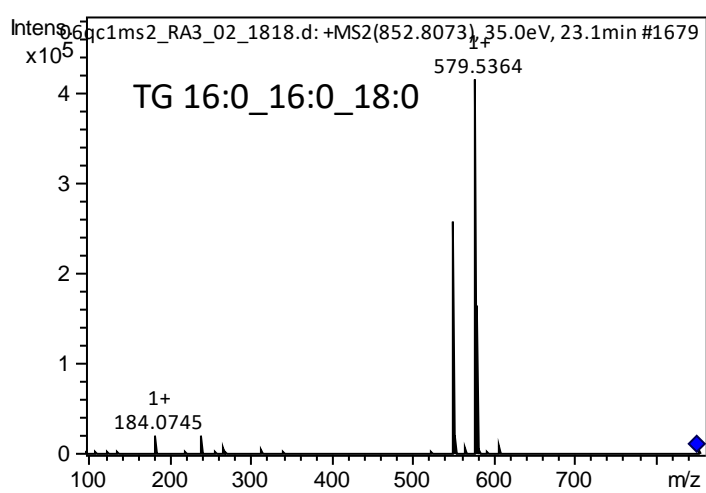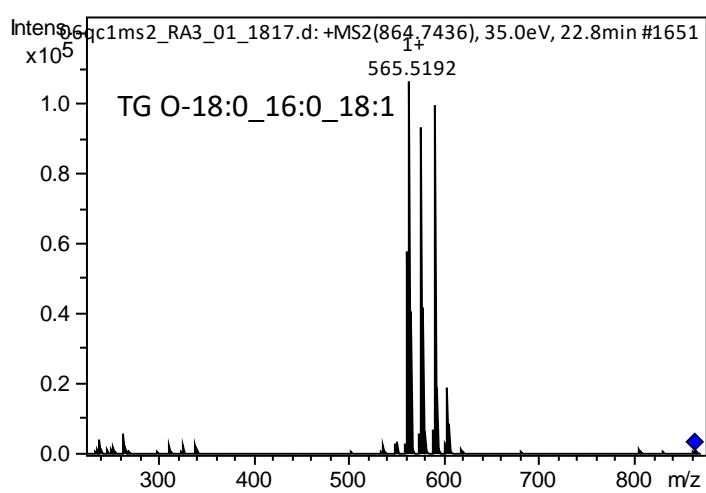

# Negative ion mode lipid markers MS/MS

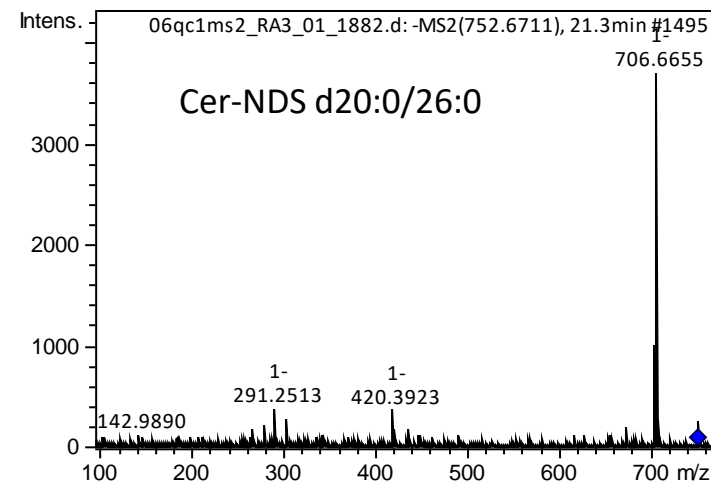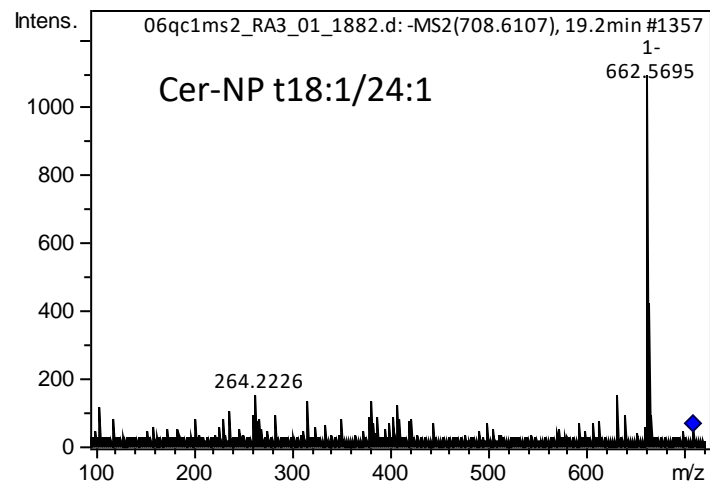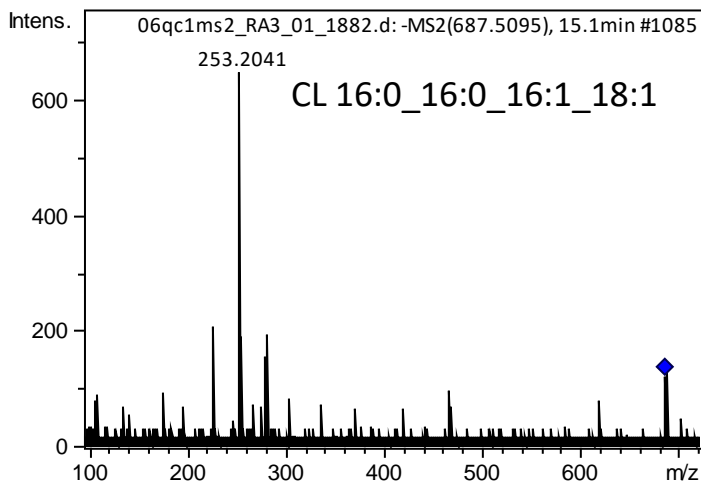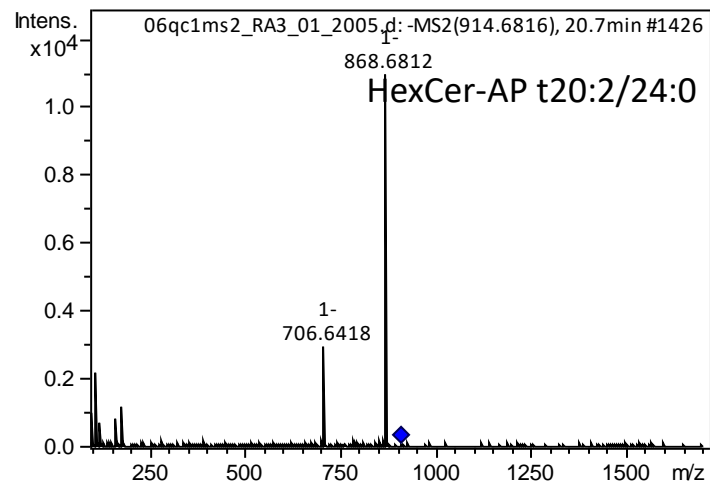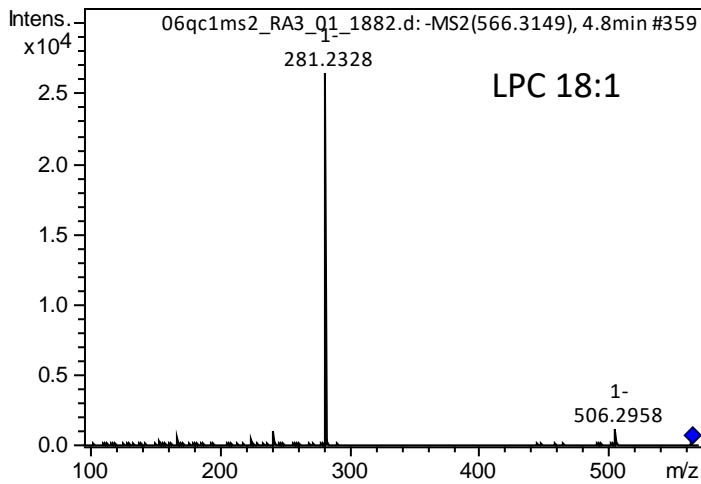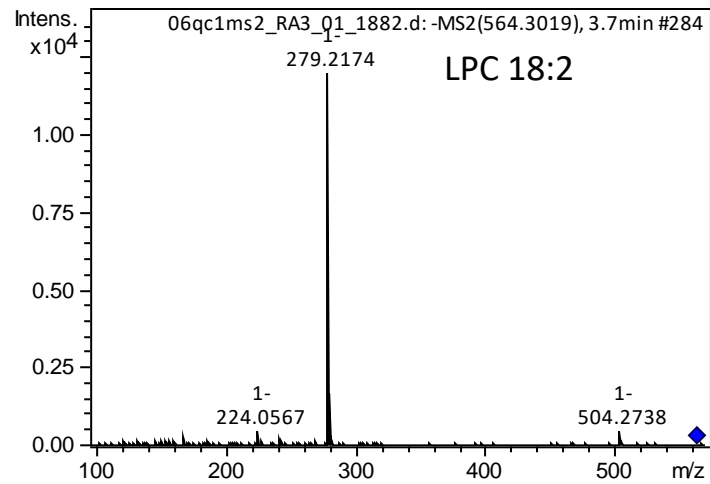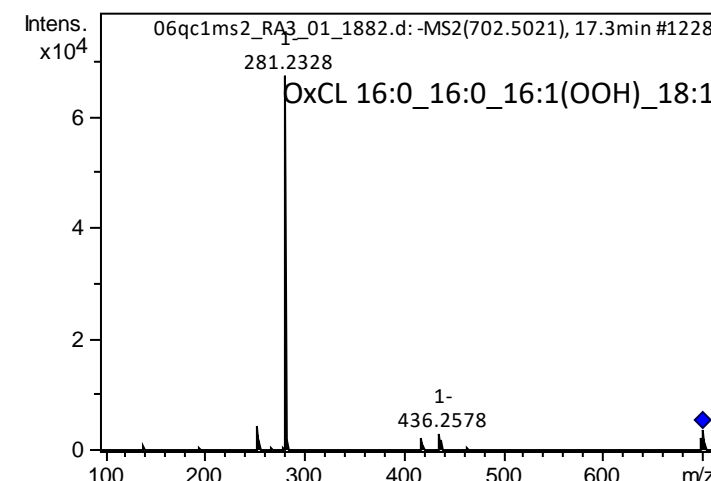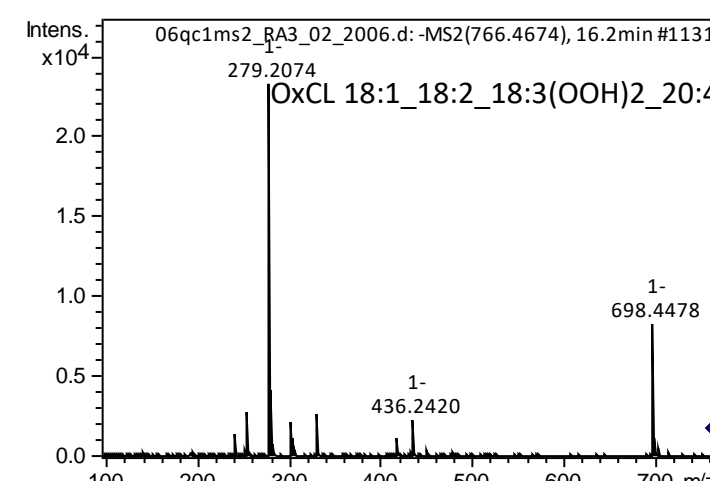

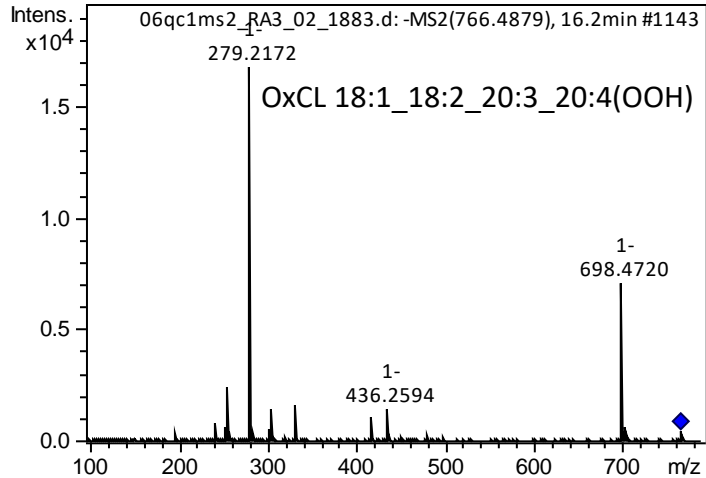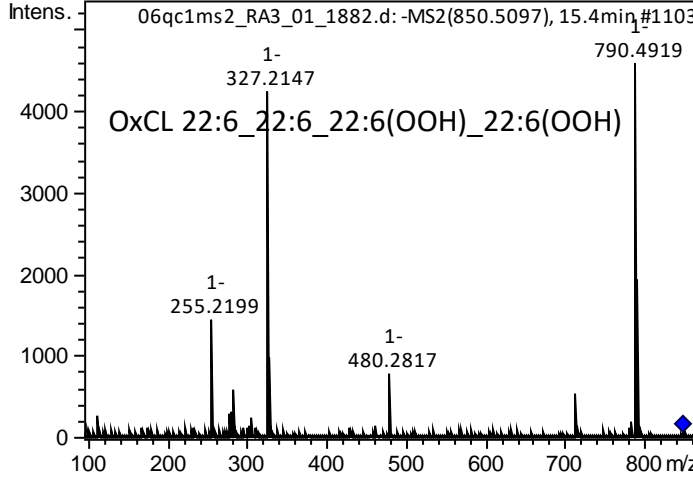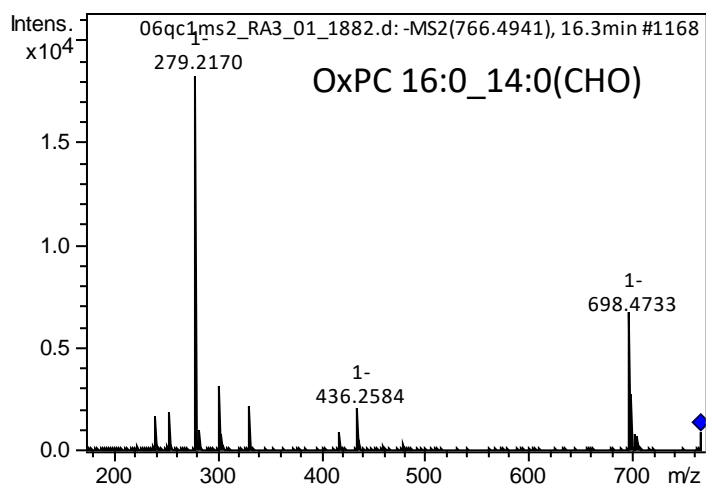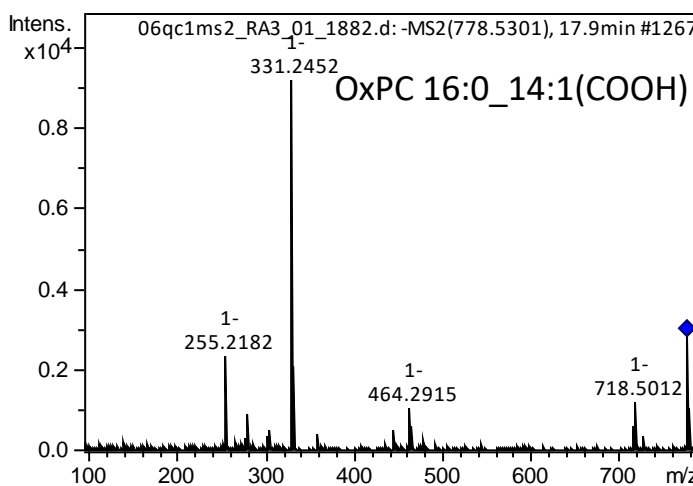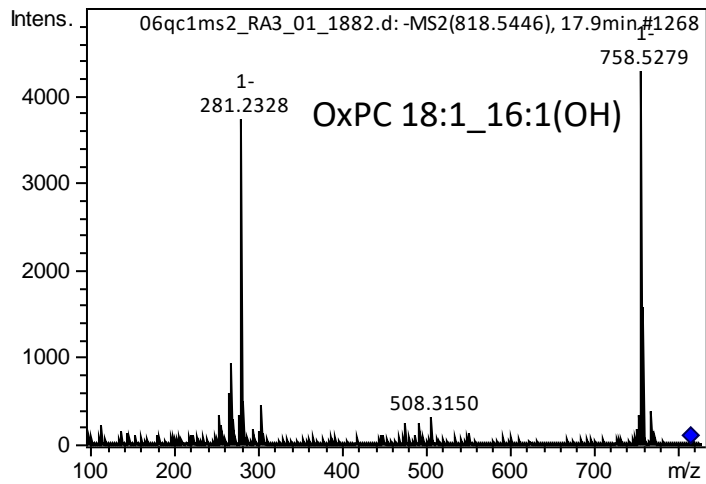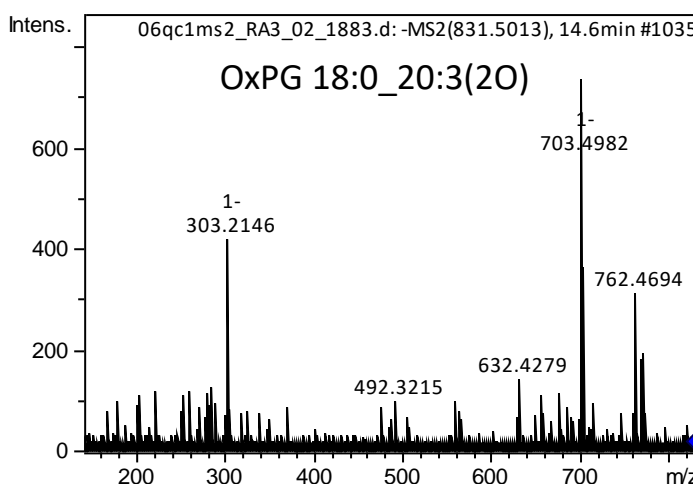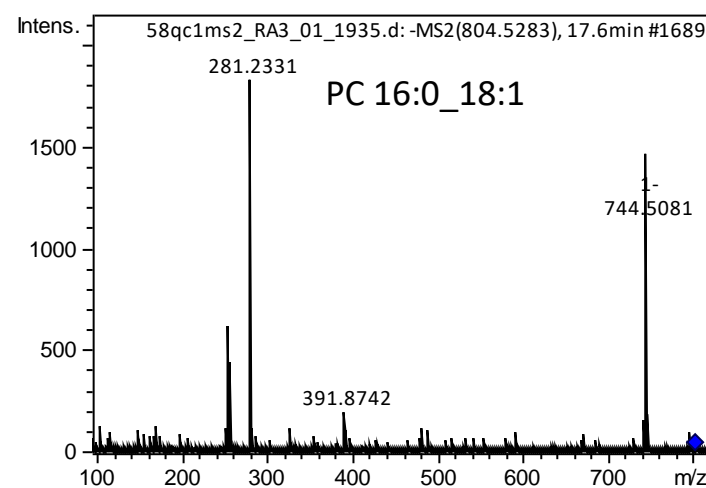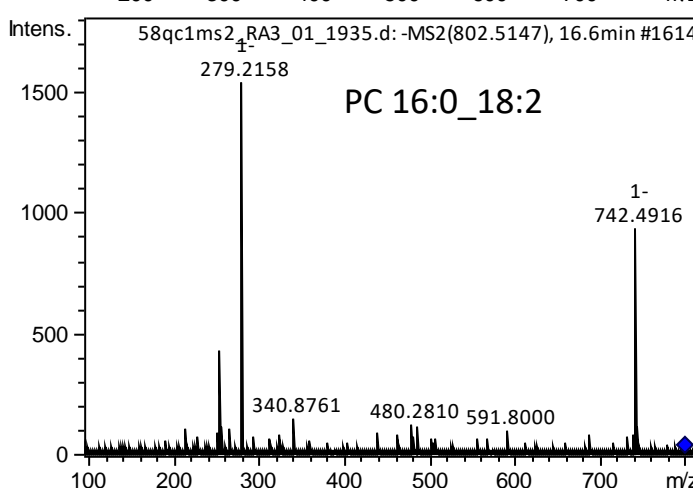

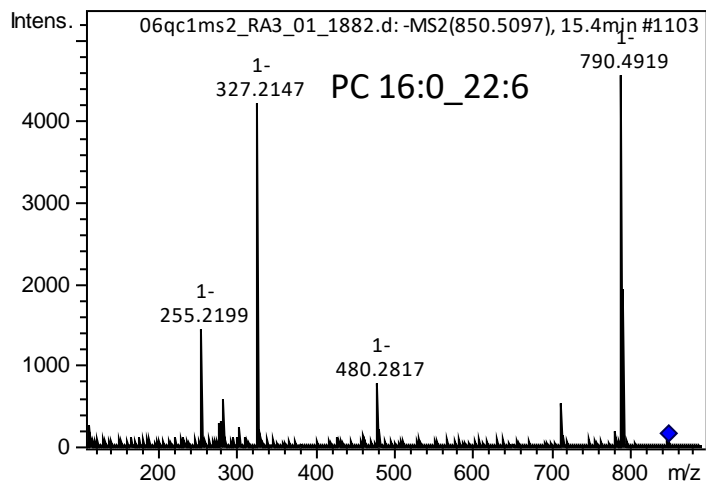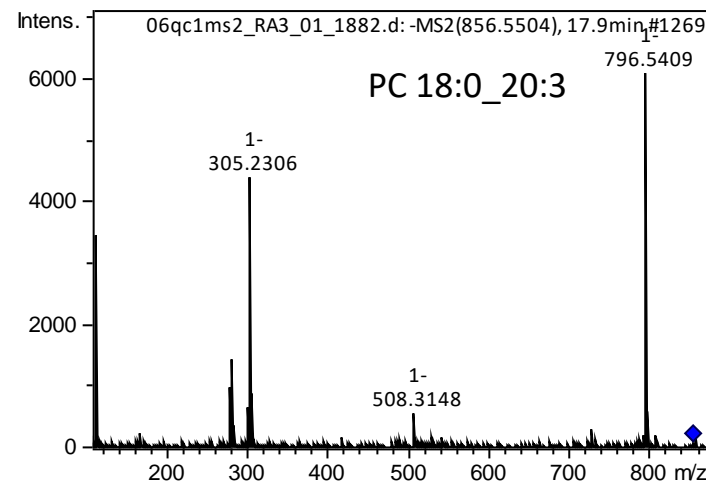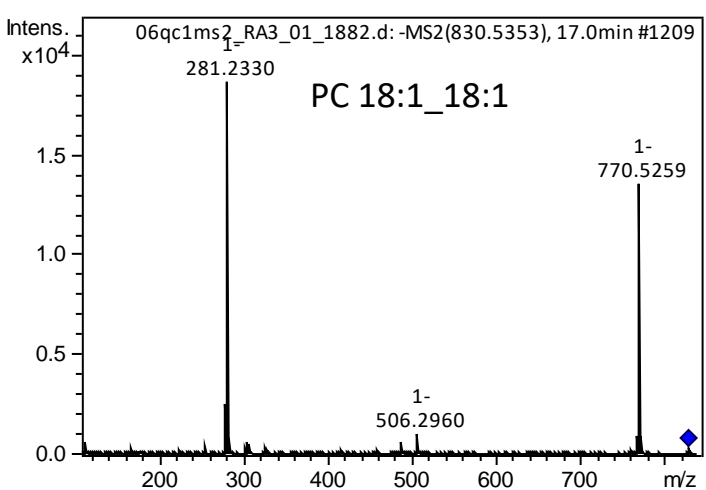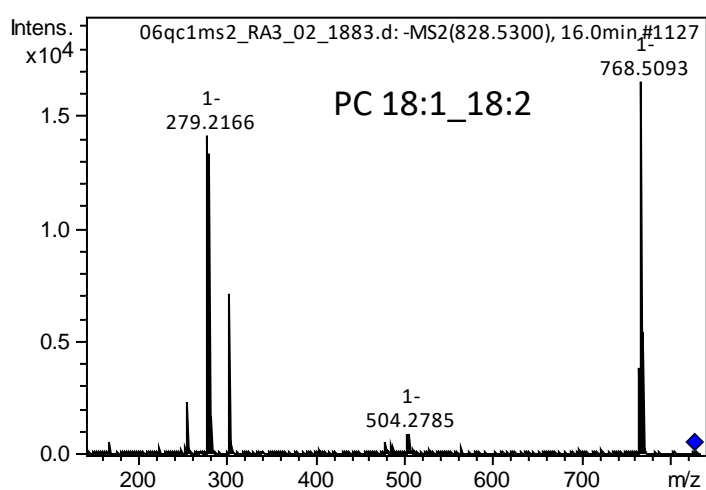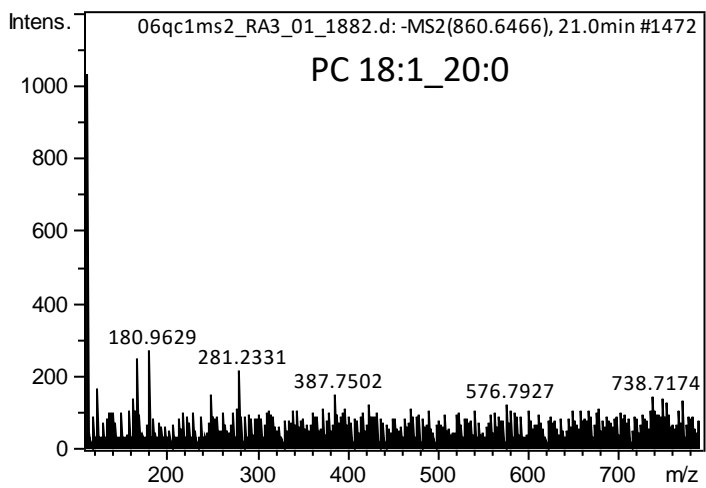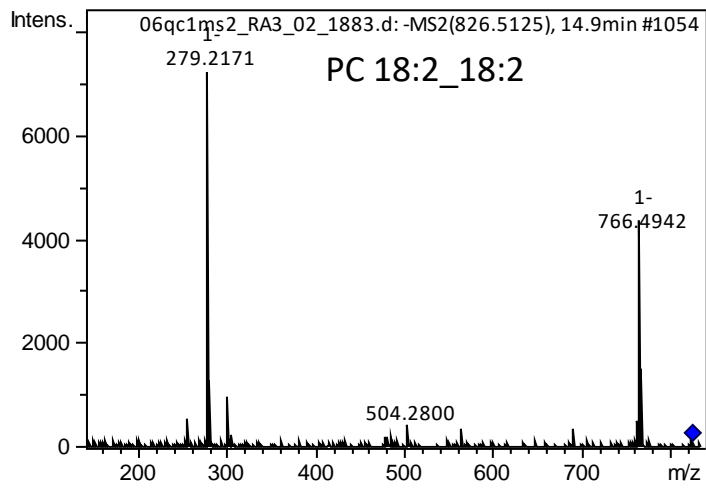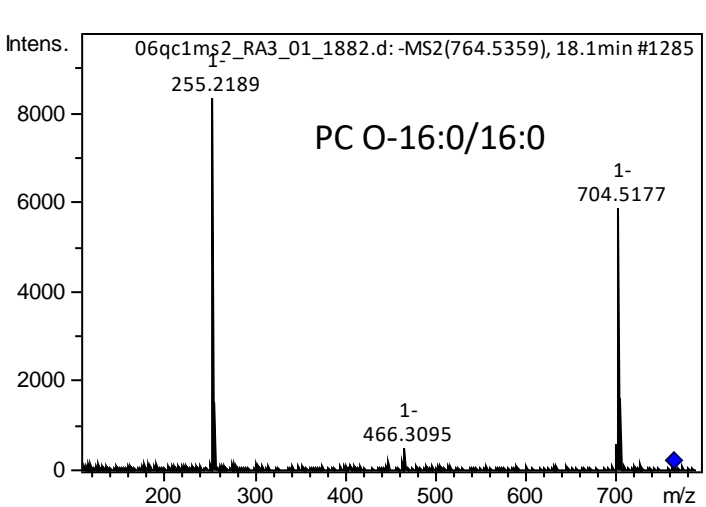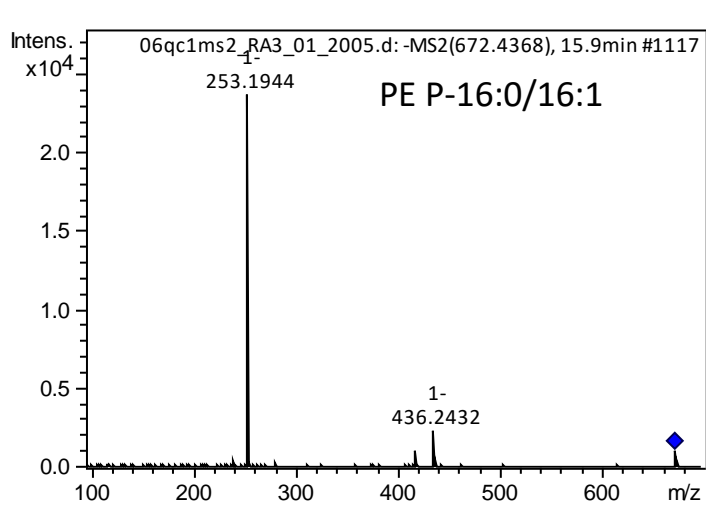

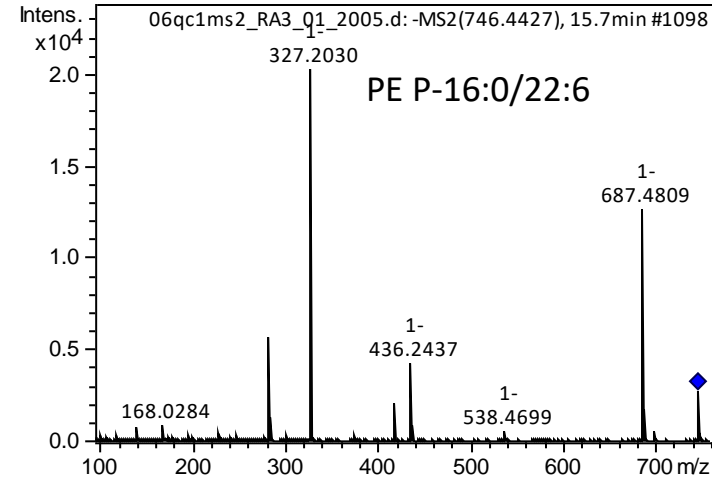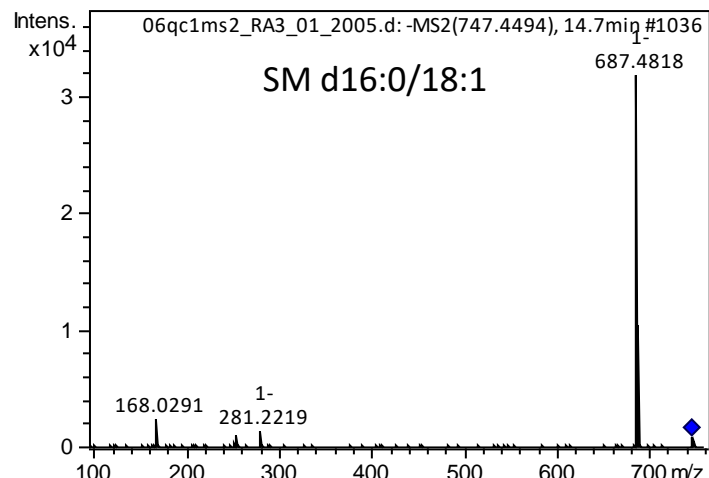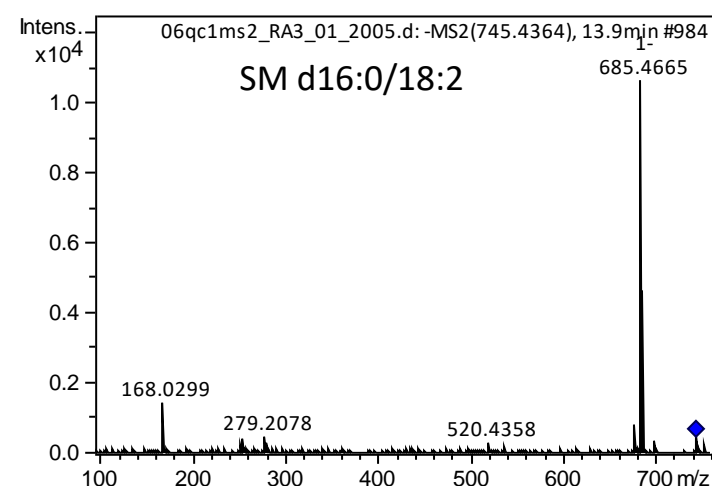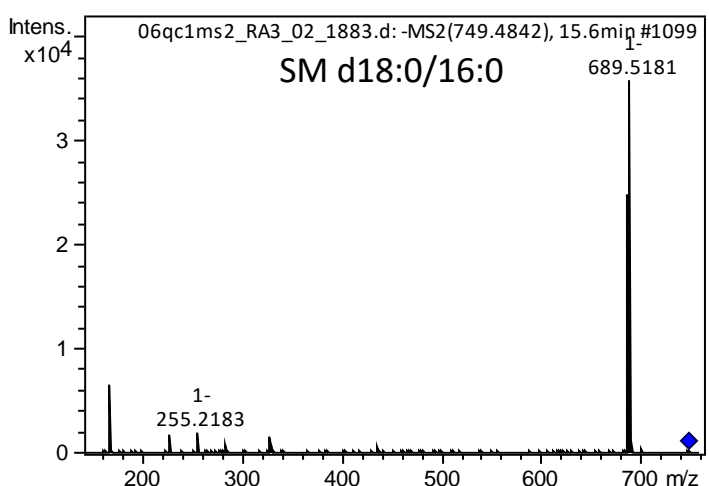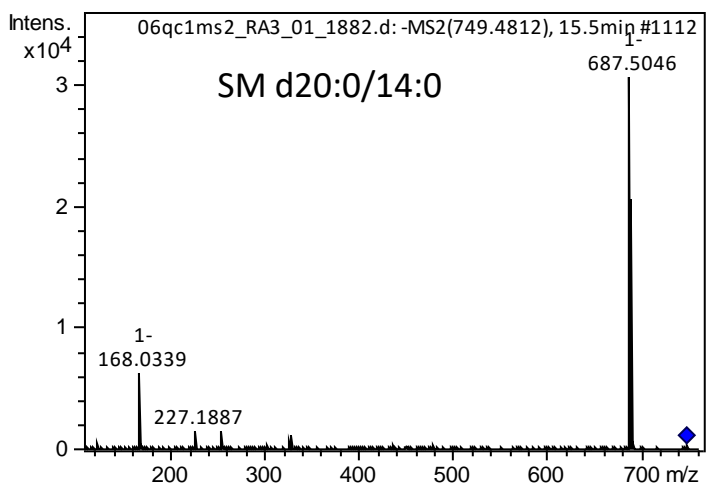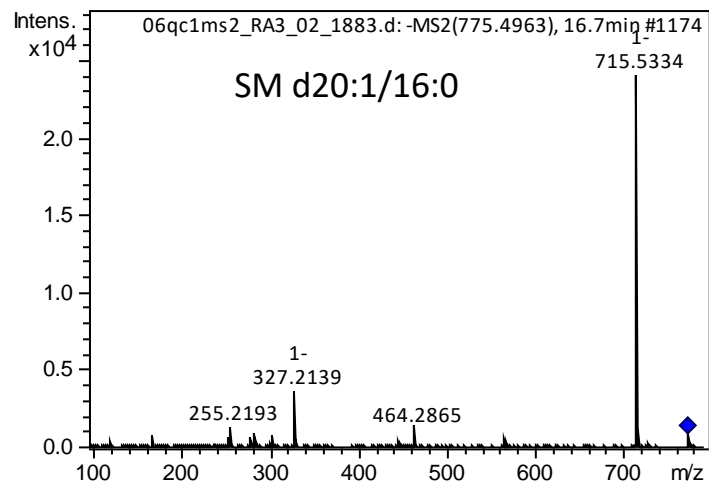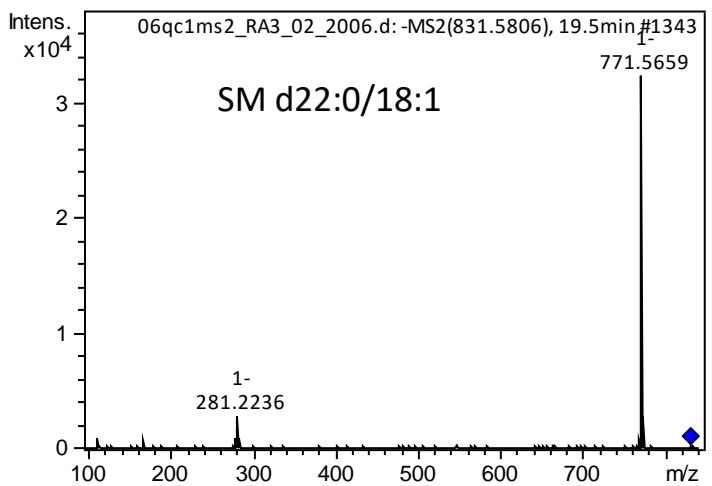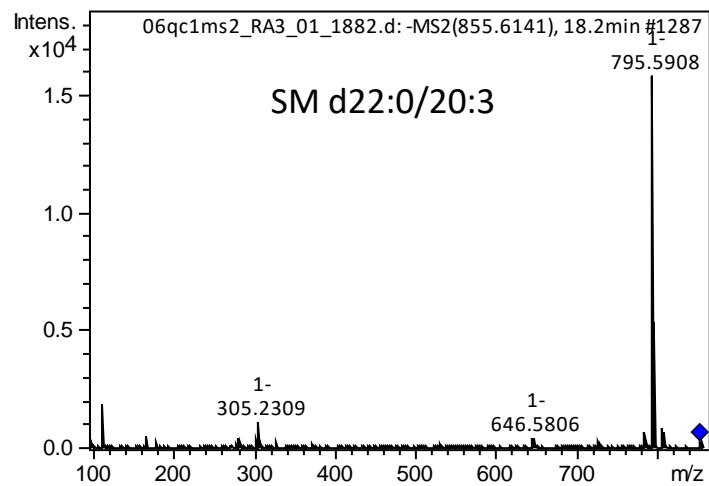



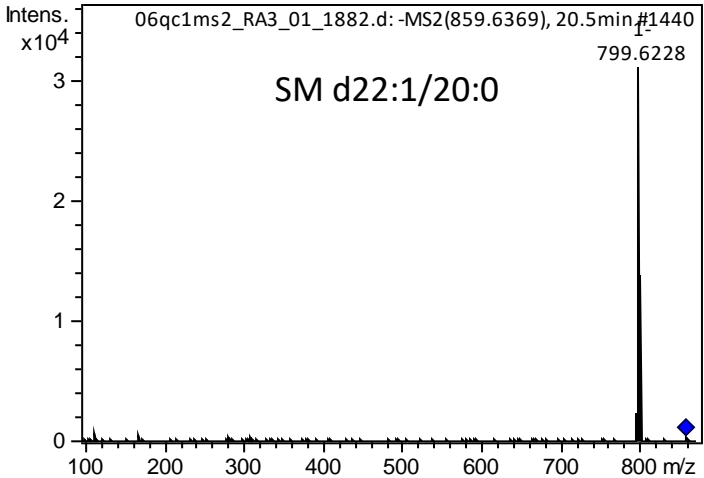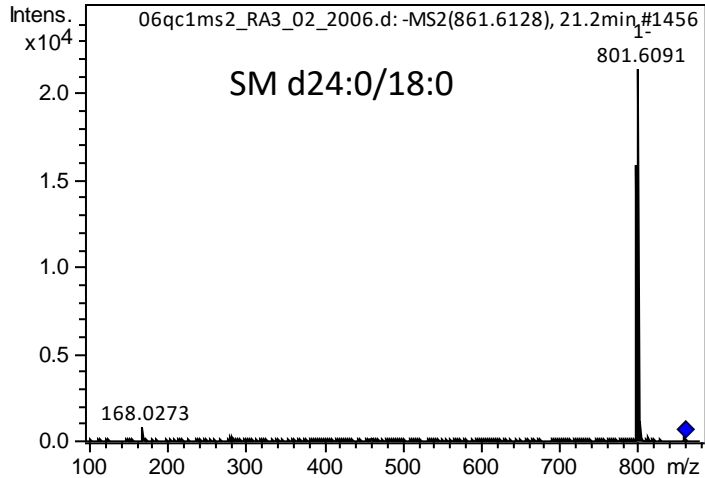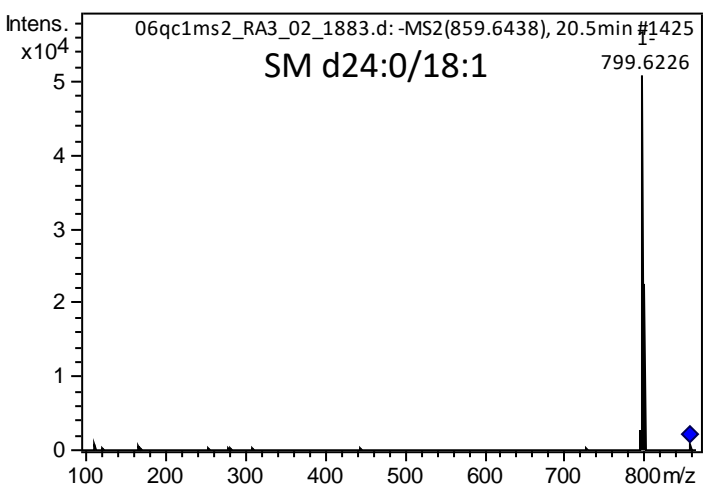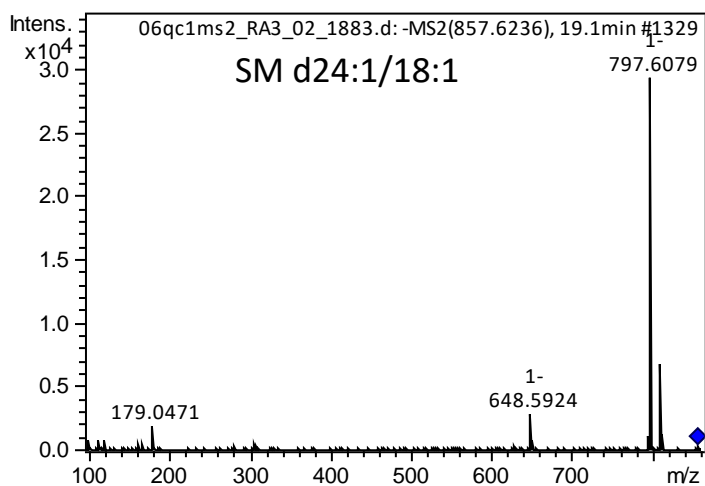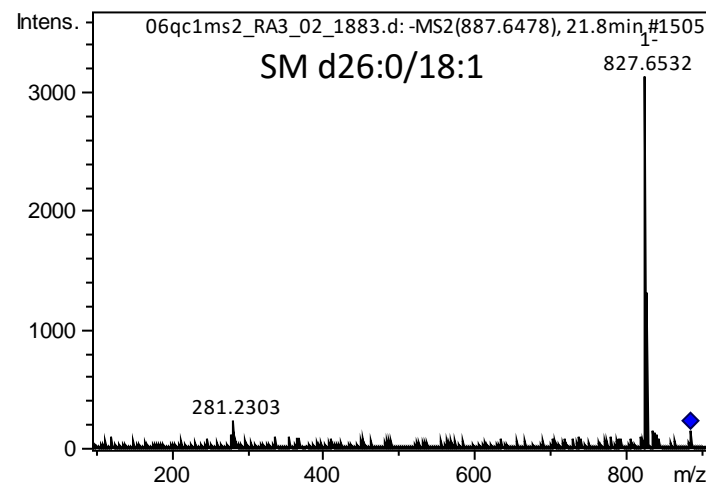

Supplement: s1 [file s1]
